# Supplementary material
Source: publisher site journal article supplement (https://www.spandidos-publications.com/5797/downloadSupplementary)
Supplement: Supplementary file 1 [file downloadSupplementary]

## Sheet: Sheet1
Table SIII. Prognostic–related genes
Tag	HR	Lower	Upper	Likelihood	logrank	Wald	95%CI
CCL19	0.632143	0.542215	0.736986	2.01589e-08	5.80457e-09	4.68725e-09	0.194771
MFNG	0.436995	0.328965	0.580501	3.94511e-08	6.01697e-09	1.10549e-08	0.251537
LTB	0.562517	0.459872	0.688073	1.98229e-08	1.1262e-08	2.18187e-08	0.228201
KIAA1949	0.403752	0.293493	0.555434	4.02083e-08	2.07036e-08	2.49933e-08	0.261941
NAPSB	0.516173	0.408867	0.651641	1.54834e-08	2.32131e-08	2.67273e-08	0.242775
LPXN	0.489059	0.378449	0.631996	1.89292e-07	3.82694e-08	4.56009e-08	0.253546
PBK	1.5547	1.32205	1.82829	2.06394e-07	5.65761e-08	9.51768e-08	0.506235
ARHGAP15	0.497934	0.385019	0.643965	1.98868e-07	1.00526e-07	1.0719e-07	0.258946
PTPRN	1.71267	1.38771	2.11372	1.4405e-05	1.02127e-07	5.37909e-07	0.726009
PPP1R16B	0.552384	0.440989	0.691917	1.6945e-07	1.23002e-07	2.40532e-07	0.250928
CD37	0.605581	0.501057	0.73191	1.74136e-07	1.31879e-07	2.12044e-07	0.230853
CD52	0.612879	0.51066	0.735558	2.88075e-07	1.41696e-07	1.44832e-07	0.224899
INPP5D	0.436177	0.320016	0.594503	1.62841e-07	1.64316e-07	1.51067e-07	0.274487
INHA	1.46931	1.26241	1.71013	1.03948e-05	1.90689e-07	6.72235e-07	0.447715
FMNL3	0.332685	0.219016	0.505346	8.06916e-07	1.94647e-07	2.4719e-07	0.28633
ARHGDIB	0.395481	0.27678	0.56509	1.20517e-06	2.07246e-07	3.495e-07	0.28831
PPARGC1B	0.505031	0.388907	0.65583	1.71905e-07	2.54064e-07	2.98441e-07	0.266924
SPOCK2	0.637376	0.535167	0.759106	2.22319e-06	2.78444e-07	4.40331e-07	0.223939
IRF8	0.553715	0.44304	0.692038	8.69969e-07	2.93387e-07	2.04172e-07	0.248997
FXYD4	1.52021	1.28232	1.80224	4.51275e-05	4.00368e-07	1.40762e-06	0.519919
TNFSF12	0.300939	0.188596	0.480203	6.77165e-07	4.25063e-07	4.73822e-07	0.291607
TNFRSF7	0.53351	0.417198	0.682249	1.36733e-07	4.40863e-07	5.5174e-07	0.265051
A2M	0.584905	0.472031	0.724769	1.28414e-06	5.97651e-07	9.45632e-07	0.252737
CDH16	1.59202	1.31437	1.92831	3.3593e-05	6.2695e-07	1.97851e-06	0.613944
PTGDS	0.749279	0.668044	0.840393	2.74269e-06	6.43339e-07	8.23182e-07	0.172349
PKP2	1.69804	1.37081	2.10338	1.49106e-06	6.60637e-07	1.24898e-06	0.732563
DNER	1.37217	1.20483	1.56274	7.5217e-06	7.85631e-07	1.85772e-06	0.357905
IL32	0.532655	0.413261	0.686543	1.37551e-06	8.23855e-07	1.14842e-06	0.273282
GNAI2	0.462456	0.338515	0.631776	2.73555e-06	8.26031e-07	1.26674e-06	0.293262
IL10RA	0.598765	0.488318	0.734193	3.79066e-06	8.97912e-07	8.22395e-07	0.245876
ARHGAP9	0.538728	0.420413	0.690339	9.78893e-07	9.79602e-07	1.01376e-06	0.269926
RAC2	0.560695	0.443261	0.709242	3.24032e-06	1.02297e-06	1.39927e-06	0.265981
SLC15A3	0.545778	0.427727	0.69641	1.21399e-06	1.19418e-06	1.11837e-06	0.268682
LOC653743	0.559694	0.441599	0.709372	3.50027e-06	1.2197e-06	1.58858e-06	0.267774
GMFG	0.536167	0.41516	0.692443	2.24489e-06	1.43228e-06	1.78625e-06	0.277283
HAL	1.6869	1.35734	2.09649	2.91166e-05	1.44691e-06	2.41915e-06	0.739148
VASH1	0.510311	0.386378	0.673996	3.10375e-06	1.47059e-06	2.14294e-06	0.287618
KCNJ6	1.69136	1.35489	2.11138	4.73366e-05	1.49065e-06	3.4216e-06	0.756487
CD2	0.625643	0.516102	0.758435	3.82351e-06	1.59033e-06	1.7924e-06	0.242333
WAS	0.561517	0.442857	0.711972	2.11398e-06	1.60395e-06	1.89139e-06	0.269115
IL7R	0.627918	0.518025	0.761123	4.87529e-06	1.72114e-06	2.12883e-06	0.243098
ARHGEF6	0.508916	0.386665	0.669818	4.5528e-06	1.77986e-06	1.44252e-06	0.283153
RPRM	1.31247	1.16979	1.47255	1.65057e-05	1.82534e-06	3.64325e-06	0.302759
EVI2B	0.494801	0.370183	0.66137	5.8109e-06	1.86638e-06	2.0074e-06	0.291188
VGF	1.4335	1.23126	1.66896	1.39337e-05	1.88591e-06	3.46446e-06	0.437692
CD6	0.670049	0.568249	0.790086	8.59955e-06	1.88592e-06	1.91449e-06	0.221838
GYPC	0.44769	0.322542	0.621394	3.03921e-06	1.90123e-06	1.55362e-06	0.298852
LGALS9	0.582162	0.464574	0.729514	3.57723e-06	1.97529e-06	2.60746e-06	0.26494
MCOLN2	0.593282	0.478108	0.736202	3.58661e-06	1.99596e-06	2.12686e-06	0.258095
TBC1D10C	0.610629	0.499021	0.747199	3.23697e-06	2.12482e-06	1.66944e-06	0.248178
GHRL	0.530277	0.406023	0.692558	9.28444e-07	2.21777e-06	3.21233e-06	0.286535
FAIM3	0.558159	0.438605	0.710301	2.7092e-06	2.28623e-06	2.12295e-06	0.271696
GIMAP8	0.663334	0.559118	0.786976	1.15335e-05	2.34579e-06	2.51371e-06	0.227859
LOC644065	0.224897	0.120177	0.420871	3.68883e-06	2.48786e-06	3.06193e-06	0.300694
HLA-E	0.496233	0.370281	0.665029	1.13884e-05	2.5185e-06	2.72259e-06	0.294748
LBA1	0.402221	0.274136	0.590153	2.19426e-06	2.60146e-06	3.22304e-06	0.316018
ADAM3A	0.0769225	0.0262298	0.225586	1.20986e-06	2.74598e-06	2.97473e-06	0.199356
ITGB2	0.568647	0.448711	0.72064	6.68876e-06	2.84425e-06	3.002e-06	0.271929
FGD2	0.311947	0.189667	0.513062	9.76106e-07	3.01209e-06	4.45866e-06	0.323395
STAT4	0.652505	0.544307	0.78221	2.44597e-05	3.02462e-06	3.9247e-06	0.237903
RBP5	0.446972	0.31809	0.628073	6.49697e-06	3.30616e-06	3.48745e-06	0.309983
RASGRP2	0.408133	0.280045	0.594807	1.52357e-06	3.38035e-06	3.10998e-06	0.314762
GPSM3	0.628054	0.515506	0.765175	2.13235e-05	3.46478e-06	3.90466e-06	0.249669
CD48	0.681987	0.579528	0.80256	6.89218e-06	3.5044e-06	4.06539e-06	0.223032
PTPRCAP	0.643066	0.53248	0.776618	7.40165e-06	3.77614e-06	4.52328e-06	0.244138
COX4I2	0.637941	0.525344	0.774672	2.59623e-06	4.24638e-06	5.7108e-06	0.249328
TNFRSF4	0.370203	0.241342	0.567867	3.84805e-06	4.37285e-06	5.30684e-06	0.326524
FLT3LG	0.610772	0.493664	0.75566	1.05669e-05	4.4116e-06	5.63746e-06	0.261996
MLF1IP	1.64279	1.32295	2.03996	2.31441e-05	4.85846e-06	7.01646e-06	0.717006
MGC2463	0.673107	0.567461	0.798421	6.80064e-06	5.15e-06	5.51231e-06	0.23096
TMEM119	0.593913	0.474497	0.743383	2.71941e-06	5.23654e-06	5.38644e-06	0.268886
CXCL16	0.501972	0.372217	0.676958	1.40639e-05	5.25073e-06	6.27736e-06	0.304741
HSF2BP	1.63905	1.31867	2.03727	2.03187e-05	5.41388e-06	8.47598e-06	0.718602
U18B	0.259453	0.144654	0.46536	2.84976e-06	5.90953e-06	6.00618e-06	0.320706
SMC1L2	1.77451	1.37655	2.28752	6.74998e-05	5.93209e-06	9.57509e-06	0.910967
GIMAP4	0.569892	0.445715	0.728665	9.32697e-06	6.13509e-06	7.31374e-06	0.28295
TNS3	0.34602	0.218833	0.54713	7.71298e-06	6.28331e-06	5.63417e-06	0.328297
TRPC6	0.600407	0.480995	0.749465	2.60022e-06	6.37252e-06	6.51455e-06	0.26847
LOC653157	0.615142	0.496622	0.761946	1.85808e-05	7.0564e-06	8.59636e-06	0.265323
TNIP3	0.648736	0.535051	0.786575	3.25963e-06	7.11298e-06	1.07171e-05	0.251524
NEXN	0.511418	0.381036	0.686416	1.06177e-05	7.14722e-06	7.97409e-06	0.30538
MND1	1.83286	1.40737	2.38698	1.3465e-05	7.30933e-06	6.94117e-06	0.979607
PLCB2	0.572606	0.448718	0.730699	6.33287e-06	7.72323e-06	7.38577e-06	0.281982
PPM1M	0.474274	0.340634	0.660345	9.61523e-06	8.29469e-06	9.98719e-06	0.319711
SERPING1	0.325008	0.199753	0.528803	3.93404e-06	8.31317e-06	6.02814e-06	0.32905
ITGAL	0.620956	0.502891	0.766739	7.61584e-06	8.37098e-06	9.48847e-06	0.263848
AKNA	0.541484	0.413016	0.709911	7.33473e-06	8.43033e-06	9.01825e-06	0.296895
TIP39	1.40752	1.19145	1.66276	0.000903319	8.53568e-06	5.81784e-05	0.471315
MAP4K1	0.580873	0.456189	0.739636	6.8717e-06	8.7977e-06	1.05111e-05	0.283448
CCR7	0.670787	0.56165	0.801132	2.05483e-05	9.00216e-06	1.04666e-05	0.239482
CD3E	0.657689	0.545862	0.792425	1.01109e-05	9.25634e-06	1.04931e-05	0.246564
HCST	0.590334	0.46698	0.746273	9.41393e-06	9.36234e-06	1.04769e-05	0.279293
CD247	0.631746	0.514824	0.775221	1.56685e-05	9.69289e-06	1.09138e-05	0.260397
KIAA0748	0.505789	0.373161	0.685553	1.04044e-05	1.005e-05	1.11731e-05	0.312392
KRTHB1	1.24945	1.12685	1.38539	0.000107986	1.0091e-05	2.37499e-05	0.25854
CCND2	0.543787	0.415019	0.712507	1.46236e-05	1.03462e-05	9.94171e-06	0.297488
SNAP23	0.404674	0.269745	0.607095	2.35786e-05	1.10505e-05	1.23355e-05	0.33735
C6orf32	0.676994	0.568073	0.8068	3.96494e-05	1.10529e-05	1.30858e-05	0.238727
LOC646812	0.199416	0.0970168	0.409894	2.36911e-05	1.11272e-05	1.15433e-05	0.312877
SLC13A5	1.53554	1.25873	1.87323	0.000148425	1.12043e-05	2.34996e-05	0.614498
LOC652881	0.381286	0.246852	0.588932	1.20637e-05	1.12579e-05	1.38159e-05	0.342081
CD74	0.671371	0.560995	0.803464	4.66468e-05	1.14455e-05	1.37486e-05	0.242469
DNASE1L3	0.73065	0.632879	0.843526	1.73578e-05	1.30207e-05	1.85562e-05	0.210648
ICOS	0.625778	0.505738	0.774311	2.36657e-05	1.31464e-05	1.60441e-05	0.268573
RAFTLIN	0.520125	0.386158	0.700567	3.42799e-05	1.31517e-05	1.69327e-05	0.314409
FLJ21438	0.600671	0.477527	0.755571	1.37416e-05	1.35058e-05	1.3344e-05	0.278043
VAMP1	0.254736	0.137111	0.473266	1.66301e-05	1.38236e-05	1.51126e-05	0.336155
FLJ21986	0.559405	0.429934	0.727866	1.50959e-05	1.38977e-05	1.5258e-05	0.297932
EMP3	0.540603	0.40799	0.71632	2.20353e-05	1.40949e-05	1.84101e-05	0.30833
HLA-DPA1	0.646823	0.530817	0.788182	4.71842e-05	1.41138e-05	1.55859e-05	0.257365
GVIN1	0.624049	0.505156	0.770924	1.3046e-05	1.49442e-05	1.22844e-05	0.265769
CD4	0.671876	0.561897	0.803382	1.82045e-05	1.50213e-05	1.29846e-05	0.241485
FNBP1	0.440337	0.302794	0.640361	1.47347e-05	1.50245e-05	1.7648e-05	0.337567
ARHGEF3	0.44251	0.303593	0.644991	3.07696e-05	1.54815e-05	2.2241e-05	0.341398
TMEM173	0.407979	0.270787	0.614677	2.15648e-05	1.55024e-05	1.81051e-05	0.343889
C1QTNF4	0.286283	0.16034	0.511149	1.146e-05	1.56787e-05	2.34731e-05	0.350809
LOC648044	0.301485	0.174043	0.522247	3.26348e-05	1.58104e-05	1.89118e-05	0.348203
EDG6	0.566485	0.436506	0.735167	1.99882e-05	1.59901e-05	1.92486e-05	0.29866
GRIN2C	1.42802	1.20206	1.69645	0.000711133	1.60436e-05	5.03347e-05	0.494388
LOC648470	0.52326	0.388951	0.703948	1.29751e-05	1.60754e-05	1.87277e-05	0.314997
CD3D	0.575986	0.447384	0.741554	4.14463e-05	1.69323e-05	1.87393e-05	0.29417
CLEC14A	0.632348	0.513293	0.779018	2.24255e-05	1.69586e-05	1.65953e-05	0.265725
P2RY8	0.663656	0.549461	0.801586	3.42665e-05	1.71994e-05	2.08517e-05	0.252125
C10orf54	0.69112	0.583312	0.818854	0.000132256	1.72868e-05	1.95802e-05	0.235541
C20orf70	1.61439	1.29426	2.0137	0.000158191	1.76899e-05	2.16304e-05	0.719438
BTN3A1	0.24507	0.13248	0.453349	1.15874e-06	1.78881e-05	7.44183e-06	0.32087
DOCK8	0.661189	0.546867	0.799409	6.72629e-05	1.80241e-05	1.94188e-05	0.252542
FAM57B	1.53842	1.25765	1.88187	0.000120511	1.82932e-05	2.79342e-05	0.624222
MGC15619	0.448389	0.309118	0.650408	2.78614e-06	1.84025e-05	2.37137e-05	0.34129
TRAF3IP3	0.634332	0.515097	0.781167	2.78653e-05	1.86068e-05	1.83006e-05	0.26607
CDCA2	1.6811	1.32202	2.13771	2.42002e-05	1.90283e-05	2.26464e-05	0.815683
KLHL6	0.61417	0.490598	0.768867	2.25325e-05	1.93867e-05	2.10798e-05	0.278269
HLA-DMB	0.563249	0.432982	0.732708	2.37701e-05	1.97446e-05	1.8903e-05	0.299726
FGD5	0.646247	0.528792	0.789791	7.58589e-05	2.06599e-05	1.99153e-05	0.260998
TRPV2	0.60558	0.480942	0.762517	4.56043e-05	2.08243e-05	1.98988e-05	0.281575
SELL	0.691316	0.582761	0.820091	4.03226e-05	2.1248e-05	2.27842e-05	0.23733
CD3G	0.657771	0.541087	0.799617	2.93974e-05	2.15797e-05	2.61732e-05	0.25853
TNF	0.565787	0.43298	0.73933	8.70762e-06	2.15833e-05	3.01178e-05	0.30635
CD34	0.313601	0.183084	0.537162	2.07293e-05	2.21748e-05	2.4084e-05	0.354078
IQGAP2	0.686333	0.575033	0.819176	7.32835e-05	2.31628e-05	3.0541e-05	0.244143
HLA-DPB1	0.716927	0.614048	0.837043	5.90777e-05	2.3172e-05	2.5462e-05	0.222996
CD79B	0.604904	0.47819	0.765196	1.46354e-05	2.3466e-05	2.77196e-05	0.287005
MFAP4	0.702295	0.595819	0.8278	2.82782e-05	2.34696e-05	2.52259e-05	0.231982
CXCL14	0.753939	0.660393	0.860736	1.18653e-05	2.35365e-05	2.9317e-05	0.200343
SPI1	0.644759	0.525512	0.791064	2.29794e-05	2.39329e-05	2.59659e-05	0.265552
DPEP3	0.358842	0.223691	0.575647	9.17806e-06	2.39611e-05	2.13557e-05	0.351956
STK17B	0.458672	0.318167	0.661226	0.000140118	2.42528e-05	2.95891e-05	0.343059
MGC59937	1.42256	1.20386	1.68098	6.93953e-05	2.50413e-05	3.49569e-05	0.477116
LOC653371	0.560796	0.42761	0.735464	3.15878e-05	2.52141e-05	2.90317e-05	0.307854
ITK	0.654612	0.536311	0.799007	5.24599e-05	2.61589e-05	3.09551e-05	0.262696
CD5	0.639509	0.51801	0.789505	5.84e-05	2.6764e-05	3.20403e-05	0.271495
DAB2	0.494655	0.358312	0.682878	1.74322e-05	2.68879e-05	1.88206e-05	0.324566
FCRL3	0.487665	0.347864	0.683651	2.25833e-05	2.70563e-05	3.09386e-05	0.335787
APLP1	1.75413	1.34366	2.28998	0.000106851	2.71495e-05	3.59825e-05	0.946319
SELPLG	0.537885	0.402833	0.718213	2.00073e-05	2.73671e-05	2.62533e-05	0.31538
GIMAP6	0.479507	0.340305	0.675651	2.98183e-05	2.8998e-05	2.65831e-05	0.335345
Septin 6	0.428732	0.289436	0.635064	1.63425e-05	2.94287e-05	2.39056e-05	0.345628
SLC40A1	0.627439	0.502648	0.783212	5.24409e-05	2.98497e-05	3.79478e-05	0.280564
URP2	0.595018	0.46487	0.761604	2.91663e-05	3.02207e-05	3.75001e-05	0.296734
DOC1	0.448041	0.306074	0.655856	8.86942e-05	3.08335e-05	3.6345e-05	0.349782
RASSF2	0.30286	0.17067	0.537435	6.03741e-05	3.2846e-05	4.46624e-05	0.366766
FGR	0.48492	0.343314	0.684933	2.06256e-05	3.31548e-05	3.99513e-05	0.341619
AMICA1	0.663655	0.546507	0.805914	5.08033e-05	3.39501e-05	3.51039e-05	0.259407
ZMYND15	0.591926	0.461748	0.758805	3.85618e-05	3.41478e-05	3.50193e-05	0.297058
SLC7A7	0.710372	0.605561	0.833324	0.00011015	3.41548e-05	2.68533e-05	0.227763
CHAF1B	1.71553	1.32756	2.21687	1.61069e-05	3.42805e-05	3.69028e-05	0.889314
FYCO1	0.377807	0.236631	0.603208	4.89344e-05	3.48455e-05	4.55246e-05	0.366577
LOC647769	1.29846	1.13694	1.48294	0.00127216	3.49254e-05	0.000116465	0.346002
GAS7	0.24525	0.126147	0.476803	6.52197e-05	3.64554e-05	3.42086e-05	0.350655
KLRB1	0.747148	0.649345	0.859682	0.000165085	3.74238e-05	4.65914e-05	0.210338
PPAPDC3	0.440532	0.297239	0.652903	2.91268e-05	3.7891e-05	4.43186e-05	0.355663
ABI3	0.655085	0.537037	0.799081	5.78905e-05	3.95491e-05	3.01397e-05	0.262044
LIMS2	0.526392	0.387797	0.714519	1.87468e-05	3.97071e-05	3.85341e-05	0.326721
HLA-DMA	0.63655	0.512068	0.791293	0.000116237	3.97818e-05	4.73396e-05	0.279224
ANKRD37	1.6629	1.31034	2.11033	3.94194e-05	3.98763e-05	2.87457e-05	0.799996
FYN	0.487414	0.34505	0.688514	3.61837e-05	4.02584e-05	4.5494e-05	0.343464
C14orf139	0.527512	0.388372	0.716501	5.10065e-05	4.03505e-05	4.2432e-05	0.328129
POU4F1	1.3924	1.18225	1.6399	0.00027176	4.07882e-05	7.3208e-05	0.457651
PTPNS1	0.589484	0.458393	0.758064	3.57584e-05	4.17735e-05	3.8155e-05	0.299671
MRGPRF	0.571074	0.435526	0.748807	4.69701e-05	4.24903e-05	5.07e-05	0.313281
C19orf48	1.72179	1.32715	2.23378	4.04962e-05	4.29814e-05	4.29718e-05	0.906622
DOCK10	0.66647	0.548067	0.810453	0.00023831	4.34431e-05	4.78547e-05	0.262386
C6orf189	0.691795	0.578297	0.827568	4.67976e-05	4.36655e-05	5.57795e-05	0.24927
FLJ13909	1.57087	1.26206	1.95524	3.58637e-05	4.39152e-05	5.2543e-05	0.693181
TNFAIP8L1	0.496772	0.355381	0.694417	7.29797e-05	4.44165e-05	4.24061e-05	0.339036
RGS5	0.643249	0.519748	0.796095	6.76954e-05	4.51422e-05	4.98261e-05	0.276347
LOC651104	0.311009	0.176417	0.548283	6.46846e-05	4.53017e-05	5.40368e-05	0.371866
RASGRP3	0.507596	0.36549	0.704953	3.21886e-05	4.61139e-05	5.20341e-05	0.339464
CBX7	0.613376	0.483727	0.777773	9.32662e-05	4.68549e-05	5.47535e-05	0.294047
CLEC10A	0.536869	0.397188	0.725671	1.49039e-05	4.71689e-05	5.21998e-05	0.328483
SH2D3C	0.40927	0.265484	0.630928	6.88694e-05	4.80242e-05	5.2196e-05	0.365444
PSTPIP1	0.599385	0.469247	0.765615	3.58862e-05	4.83098e-05	4.15864e-05	0.296369
ITM2A	0.469707	0.326813	0.675081	6.71115e-05	4.86889e-05	4.44355e-05	0.348268
CAPG	0.637555	0.514363	0.790252	0.000123791	5.09835e-05	3.97707e-05	0.275889
ENG	0.718859	0.611693	0.8448	0.000331132	5.19257e-05	6.13407e-05	0.233107
CD86	0.50038	0.357038	0.701271	2.90133e-05	5.43983e-05	5.8053e-05	0.344233
NOL4	1.61092	1.26476	2.05182	0.00105392	5.51061e-05	0.000112059	0.78706
IQSEC1	0.467632	0.323336	0.676323	0.000140508	5.66499e-05	5.40717e-05	0.352987
OBFC2A	0.560086	0.421949	0.743446	0.000103457	5.69458e-05	6.02965e-05	0.321497
TXK	0.384077	0.239681	0.615466	4.7486e-05	5.792e-05	6.96575e-05	0.375785
CXorf9	0.649677	0.525898	0.802588	7.29653e-05	5.86322e-05	6.35642e-05	0.27669
SPANXB1	1.51212	1.21954	1.8749	0.0016943	5.8811e-05	0.000163939	0.65536
PARVG	0.586026	0.451965	0.759854	4.03313e-05	5.90413e-05	5.52768e-05	0.307889
ABI3BP	0.702613	0.590509	0.836001	8.54195e-05	5.93114e-05	6.89958e-05	0.245492
DKFZp451A211	1.71419	1.30723	2.24786	0.000588519	6.10421e-05	9.72556e-05	0.940627
BCL3	0.557869	0.418065	0.744423	0.000127365	6.12598e-05	7.33396e-05	0.326357
CD44	0.572905	0.436012	0.752778	8.09912e-05	6.16187e-05	6.37668e-05	0.316766
MGC14376	0.675842	0.559044	0.817043	0.000171728	6.24041e-05	5.18093e-05	0.257999
LYN	0.445589	0.298391	0.665401	9.71787e-05	6.32375e-05	7.7799e-05	0.36701
C5orf20	0.569713	0.432753	0.750018	5.65252e-05	6.36585e-05	6.06144e-05	0.317265
RTN1	0.389131	0.245647	0.616423	7.56045e-05	6.5207e-05	5.78654e-05	0.370775
GIMAP5	0.746505	0.646787	0.861597	0.000217859	6.65351e-05	6.43596e-05	0.21481
RUNX3	0.367672	0.223898	0.603768	6.86856e-05	6.65471e-05	7.69275e-05	0.37987
SRF	0.453152	0.30658	0.669798	0.000157262	6.74556e-05	7.18006e-05	0.363218
APOC1	0.674983	0.554809	0.821188	6.05516e-05	6.90303e-05	8.51856e-05	0.266378
C20orf174	0.496991	0.350622	0.70446	3.67111e-05	6.9302e-05	8.56047e-05	0.353838
HLA-DRA	0.64243	0.514997	0.801395	0.000300716	7.05016e-05	8.75859e-05	0.286398
LOC440928	1.40092	1.18465	1.65667	0.000103485	7.09999e-05	8.12663e-05	0.472017
ETS1	0.63344	0.505648	0.793527	0.000252192	7.16425e-05	7.13818e-05	0.287879
LTA	0.612708	0.479641	0.782691	5.60579e-05	7.50574e-05	8.80843e-05	0.30305
GAD1	1.42982	1.19484	1.71102	0.000217084	7.58193e-05	9.49159e-05	0.516183
AP3B2	1.50918	1.22192	1.86398	0.000633008	7.79817e-05	0.000133237	0.64206
FAM43A	0.623697	0.492792	0.789375	7.45896e-05	8.07063e-05	8.57529e-05	0.296583
PYHIN1	0.613381	0.480043	0.783755	5.8992e-05	8.10869e-05	9.29425e-05	0.303713
ALOX5	0.315609	0.176951	0.562917	6.43538e-05	8.22348e-05	9.36979e-05	0.385966
ARHGAP25	0.233793	0.114081	0.479123	5.1103e-05	8.28092e-05	7.19174e-05	0.365041
ZFHX1B	0.682771	0.56411	0.826392	0.000145152	8.30856e-05	8.94203e-05	0.262281
C1orf162	0.633804	0.503643	0.797604	0.000127089	8.34383e-05	0.000101016	0.29396
MS4A7	0.680715	0.561711	0.824931	9.2235e-05	8.46335e-05	8.74597e-05	0.26322
PTK9L	0.410196	0.2623	0.64148	0.000134945	8.58335e-05	9.38175e-05	0.37918
TCF4	0.573898	0.438882	0.75045	6.9816e-05	8.60264e-05	4.9547e-05	0.311568
IRF1	0.556343	0.413894	0.747817	7.1889e-05	8.71874e-05	0.000102069	0.333923
GRK5	0.528203	0.384038	0.726487	5.40362e-05	8.78256e-05	8.67952e-05	0.342449
U2AF1L4	0.663269	0.539386	0.815604	0.000220573	9.17172e-05	9.93291e-05	0.276218
SLC2A1	1.38755	1.17605	1.63709	0.000150818	9.21059e-05	0.000103694	0.461037
PLEKHO1	0.555753	0.412701	0.748389	9.94953e-05	9.25876e-05	0.000109386	0.335688
IL12RB1	0.420928	0.272441	0.650345	6.6791e-05	9.30815e-05	9.68483e-05	0.377904
CDC25C	1.67382	1.28824	2.1748	0.000165724	9.49777e-05	0.000115282	0.886552
GIMAP7	0.507836	0.360971	0.714454	0.000120942	9.54521e-05	0.000100036	0.353483
MGC35212	1.40247	1.17533	1.67351	0.000747885	9.60541e-05	0.000175411	0.498178
HCLS1	0.637225	0.50846	0.798601	0.000205929	9.63683e-05	9.13057e-05	0.290141
GAB2	0.319098	0.179405	0.567564	0.000145679	9.73365e-05	0.000101177	0.38816
HLA-DOB	0.63028	0.498469	0.796945	8.39905e-05	9.88226e-05	0.00011526	0.298477
PIK3CD	0.624754	0.493308	0.791225	0.000126023	0.000100453	9.50442e-05	0.297917
CALB2	1.744	1.31428	2.31423	0.000187907	0.00010266	0.000116497	0.999951
LY86	0.687197	0.568624	0.830497	9.67436e-05	0.000106659	0.000103628	0.261873
ANKRD55	0.462519	0.312407	0.684759	0.000106317	0.000107837	0.000117379	0.372352
KIAA0895	1.54699	1.23922	1.9312	6.27221e-05	0.000108514	0.000115736	0.691982
DDR2	0.409636	0.261173	0.64249	0.00017663	0.000111695	0.000101707	0.381317
CD68	0.561272	0.417281	0.754951	5.3006e-05	0.000111813	0.000134275	0.33767
ARHGAP24	0.4877	0.337821	0.704075	0.000107078	0.000112507	0.000126669	0.366254
CDGAP	0.632192	0.499513	0.800113	0.000147431	0.000115298	0.000135939	0.3006
LNK	0.709373	0.595576	0.844913	0.000479688	0.00011711	0.000118622	0.249338
C9orf9	1.52896	1.2307	1.89952	0.000159245	0.000117782	0.000125686	0.668821
LOC387841	0.467564	0.316501	0.690728	0.000148773	0.00011814	0.000134283	0.374226
MCM2	1.61264	1.26326	2.05864	0.00010365	0.000118716	0.000125166	0.795385
WDR34	1.73315	1.30454	2.30258	0.00017438	0.000119043	0.000148168	0.998035
PSCD4	0.586469	0.446593	0.770155	8.85252e-05	0.000124256	0.000123747	0.323562
AGTR1	0.490828	0.340174	0.708201	4.8043e-05	0.000125365	0.000142136	0.368026
ZZEF1	0.4785	0.328151	0.697735	0.000182203	0.000126084	0.000128038	0.369584
MYLK	0.437567	0.286003	0.669452	0.000143628	0.000126144	0.000139179	0.383448
IGFBP4	0.61355	0.477505	0.788357	0.000201932	0.000126976	0.000133887	0.310852
LGR4	1.55327	1.23764	1.9494	0.000176689	0.000129114	0.000144946	0.711757
CD83	0.674119	0.551613	0.823832	0.000198152	0.000132029	0.000116316	0.272219
ACVRL1	0.607915	0.47001	0.786282	8.83794e-05	0.000133431	0.000149662	0.316272
C1orf54	0.519618	0.370781	0.7282	9.71915e-05	0.000134452	0.000143517	0.357418
HES6	1.28596	1.12857	1.46531	0.000229778	0.000139379	0.000159556	0.336738
CTDSP1	0.300019	0.160848	0.559607	0.000156858	0.000139547	0.000153617	0.398759
CYSLTR1	0.693782	0.574836	0.83734	0.000144384	0.000140352	0.000138966	0.262504
C18orf56	1.42808	1.18679	1.71843	0.000154927	0.000142889	0.000160962	0.531641
SCML4	0.400707	0.249273	0.644137	3.85436e-05	0.000144031	0.000159316	0.394864
FLJ20130	1.45642	1.19857	1.76973	0.00011526	0.000144654	0.000155607	0.571161
LOC644744	0.221394	0.102554	0.477947	4.70488e-05	0.000144974	0.000122928	0.375393
TNFRSF13B	0.718789	0.605556	0.853196	7.62646e-05	0.000145748	0.000159854	0.24764
IL18R1	0.645049	0.513881	0.809698	0.000181819	0.000146092	0.000156884	0.295817
GRRP1	0.583107	0.441068	0.770887	9.26763e-05	0.000146234	0.000152585	0.32982
C13orf18	0.637278	0.504348	0.805244	0.000186848	0.000147636	0.000160179	0.300897
CARD8	0.689663	0.569288	0.835492	0.00052741	0.000148132	0.000146778	0.266205
DENND1C	0.525845	0.377133	0.733197	5.85829e-05	0.000151204	0.000150762	0.356064
LOC641694	0.305508	0.164229	0.568324	0.000214953	0.000154136	0.000180971	0.404096
HHEX	0.673607	0.548561	0.827158	0.000188298	0.000156401	0.000162505	0.278597
FBP1	0.666487	0.538848	0.824361	0.000288273	0.000158037	0.000183509	0.285512
TAPBP	0.499176	0.346582	0.718955	0.000323685	0.000159262	0.00018957	0.372374
KIF4A	1.49454	1.2108	1.84479	0.000147299	0.000159265	0.000183597	0.633994
CAMK1	0.651578	0.520701	0.815351	0.000776331	0.000160324	0.000180853	0.29465
LOC653247	1.39175	1.1632	1.66522	0.00156521	0.000166165	0.000304328	0.502026
SATB2	1.47949	1.20502	1.81648	0.000226867	0.000168955	0.000183078	0.61146
TNFAIP2	0.593976	0.454017	0.77708	0.000128521	0.000169068	0.000144908	0.323062
DDIT4	1.52135	1.22133	1.89508	0.000323136	0.000174511	0.000181137	0.673749
LAT	0.392795	0.240224	0.642268	0.000141786	0.000174622	0.000195512	0.402044
TWIST2	0.227438	0.104349	0.495725	8.19433e-05	0.000177312	0.000195155	0.391376
LILRB5	0.585792	0.442534	0.775426	0.000105487	0.000177762	0.000185862	0.332891
HOXD11	1.53769	1.23016	1.92209	0.000519651	0.000178461	0.000157146	0.691928
LCP1	0.606828	0.466675	0.789071	0.000332899	0.00017935	0.000192988	0.322396
CD19	0.760409	0.658218	0.878465	0.000196244	0.000180963	0.00019943	0.220247
CORO1A	0.744381	0.638135	0.868317	0.000552814	0.000186411	0.000171986	0.230182
APOE	0.685455	0.56104	0.83746	0.000208056	0.000187903	0.00021924	0.27642
RHOJ	0.63082	0.494566	0.804611	0.00014139	0.000194161	0.000206468	0.310045
CCL3L3	0.719162	0.604999	0.854868	0.000249002	0.000197068	0.000185541	0.249868
PEA15	0.433927	0.278251	0.676701	0.000280184	0.000200057	0.00023095	0.39845
LRRC33	0.710747	0.593797	0.850731	0.000299591	0.000202232	0.000197351	0.256934
XK	1.31961	1.13794	1.53028	0.00047422	0.000202571	0.000242709	0.392342
B4GALNT4	1.38569	1.16342	1.65042	0.000370198	0.000204006	0.000255377	0.487004
SLC7A14	1.57227	1.22397	2.01969	0.00379572	0.000207853	0.000397568	0.795723
CDH5	0.665045	0.534624	0.827283	0.000200588	0.000208859	0.00024987	0.292659
EGFL6	0.685701	0.562173	0.836371	0.000261291	0.000209253	0.0001968	0.274198
C20orf79	0.22959	0.105356	0.500315	0.000100253	0.000209389	0.000213521	0.394959
IL27RA	0.659132	0.528349	0.822287	0.000336183	0.000212524	0.00022081	0.293939
LOC197135	0.58713	0.442571	0.778907	0.000145612	0.000215613	0.000221969	0.336336
CENTB1	0.67018	0.543526	0.826348	0.000176636	0.000216589	0.000180628	0.282822
BHLHB5	0.676855	0.550814	0.831739	0.000358048	0.00021737	0.000205345	0.280925
LAT2	0.53893	0.387998	0.748577	0.000261376	0.000218786	0.000226675	0.360579
E2F7	1.4288	1.18064	1.72911	0.000286806	0.00021976	0.00024638	0.548467
SF3A1	0.304576	0.162312	0.571531	0.000214464	0.000221532	0.000213855	0.409219
MS4A6A	0.69157	0.568016	0.842	0.000267274	0.000223412	0.000240134	0.273984
MYL9	0.58774	0.441962	0.781602	0.000255243	0.000227179	0.000258003	0.339639
HLA-DOA	0.679232	0.553205	0.833969	0.000202347	0.000227243	0.00022089	0.280763
P2RY13	0.529933	0.378759	0.741445	0.000137613	0.000228561	0.00021075	0.362687
LOC646448	0.332844	0.184829	0.599394	0.000189756	0.000230288	0.000247011	0.414566
CCL22	0.709073	0.590506	0.851447	0.000247891	0.000230476	0.000230904	0.260941
LRFN5	0.445367	0.291376	0.680742	0.000123467	0.000231133	0.000186617	0.389366
LRMP	0.693896	0.571215	0.842926	0.000415267	0.000233616	0.000231978	0.27171
TYROBP	0.703111	0.582319	0.84896	0.00032746	0.000235546	0.00024972	0.266641
LOC643883	0.29243	0.153246	0.558028	9.16927e-05	0.000235827	0.000191982	0.404782
PSMB10	0.467271	0.31001	0.704307	0.000200578	0.000241871	0.000278579	0.394297
FRMD4A	0.660418	0.530469	0.822202	0.00039248	0.000245992	0.000206339	0.291733
VPREB3	0.753767	0.646997	0.878157	0.000210723	0.000246294	0.000286502	0.23116
C1orf74	1.57736	1.24097	2.00493	0.000152733	0.00024686	0.000195989	0.763961
IGSF6	0.741206	0.631585	0.869852	0.000376009	0.000248201	0.000244937	0.238267
TTYH3	0.565609	0.416265	0.768533	0.000268576	0.00024832	0.000269418	0.352268
CNTNAP2	1.19491	1.08447	1.31659	0.000588798	0.000248725	0.000319568	0.23212
TRAPPC1	0.313387	0.169049	0.580962	0.00030049	0.00024938	0.000229247	0.411912
CEBPA	0.733285	0.621478	0.865208	0.000466417	0.00025162	0.000237582	0.24373
ZNFN1A1	0.684898	0.558833	0.839401	0.000279923	0.000262526	0.000265566	0.280567
CPVL	0.750891	0.644059	0.875444	0.00046767	0.000267929	0.000253393	0.231385
PLEK	0.765489	0.663302	0.883418	0.00071454	0.00027002	0.000256627	0.220116
PPP3CB	0.398904	0.242509	0.656157	0.000364816	0.000270544	0.000295349	0.413648
XPC	0.427653	0.27044	0.676259	0.000262833	0.000270927	0.000280128	0.405819
RRAS	0.490058	0.334213	0.718574	0.000369734	0.000272518	0.000259873	0.38436
DOCK2	0.723572	0.607878	0.861284	0.00055809	0.000273184	0.000272769	0.253406
SIDT2	0.535102	0.382268	0.749042	0.000264864	0.000275361	0.000268595	0.366774
PDGFRB	0.615195	0.472913	0.800286	0.000484776	0.000275681	0.00029454	0.327373
CDC14B	0.400722	0.243943	0.658262	0.00030775	0.000278517	0.000304792	0.414319
ITGAX	0.408471	0.257438	0.648112	3.40618e-05	0.000279962	0.000143966	0.390675
SPANXC	1.35434	1.14162	1.60671	0.0029159	0.000280785	0.000503038	0.465098
CD96	0.68281	0.555316	0.839576	0.000313412	0.000282329	0.000296703	0.28426
BBOX1	1.3422	1.14248	1.57683	0.000881154	0.000282579	0.00034298	0.434351
CDH20	0.439405	0.281683	0.685438	0.000159678	0.000283506	0.000289124	0.403755
AIF1	0.549501	0.397389	0.759839	0.000232126	0.000284705	0.000293588	0.362451
C6orf151	1.60873	1.2417	2.08425	0.000316626	0.000285462	0.000320141	0.842548
ZNF114	1.55177	1.21984	1.97401	0.000702657	0.000292372	0.000345878	0.754173
LOC648984	0.642123	0.504209	0.81776	0.000532743	0.000297356	0.000329668	0.313551
CXCL12	0.708452	0.587368	0.854498	0.000297498	0.000299697	0.000313081	0.26713
SLIT3	0.73056	0.616552	0.865649	0.00023622	0.000299754	0.000287175	0.249097
WDFY3	0.365536	0.21264	0.62837	0.000381577	0.000304718	0.000271728	0.41573
PNMA3	1.35422	1.14779	1.59778	0.000407152	0.000304983	0.000326405	0.44999
DARC	0.797249	0.703908	0.902968	0.000472689	0.000305464	0.000361721	0.19906
COP1	0.500423	0.343049	0.729993	0.000309369	0.000305961	0.000326112	0.386945
FLJ13946	1.61001	1.23966	2.091	0.000218542	0.000309997	0.000355883	0.851341
TSPAN32	0.522135	0.365273	0.746361	0.000186376	0.000311953	0.000364137	0.381088
FCER1G	0.711893	0.59151	0.856776	0.000346491	0.000312641	0.000323843	0.265265
RGL1	0.591685	0.444798	0.787081	0.000511548	0.000314377	0.000312814	0.342283
SLAMF1	0.700782	0.576567	0.851758	0.000346761	0.000314627	0.000354496	0.27519
BLK	0.666548	0.533906	0.832144	0.000168519	0.000315258	0.000339654	0.298238
KBTBD8	0.495555	0.336656	0.729451	0.000190566	0.00032252	0.000371958	0.392795
NCR3	0.56175	0.408777	0.77197	0.000144581	0.000323955	0.000377012	0.363193
NR6A1	0.181268	0.0715939	0.458949	0.000340136	0.00032474	0.000314398	0.387355
CYGB	0.648159	0.510753	0.822531	0.000444181	0.000328595	0.000360871	0.311779
CCL21	0.753492	0.646169	0.878641	0.000705847	0.000328864	0.000305922	0.232473
LYL1	0.579113	0.428983	0.781783	0.000287707	0.000332119	0.000359901	0.3528
CST5	0.514284	0.357237	0.74037	0.000199203	0.000334921	0.00034768	0.383133
LOC201725	1.61186	1.24118	2.09326	0.000458955	0.000335762	0.000343096	0.852088
EVL	0.527097	0.371654	0.747555	0.00038696	0.000336387	0.000328241	0.375902
C9orf140	1.43543	1.17798	1.74916	0.000297575	0.000337269	0.000338192	0.571175
KLRG1	0.423247	0.263319	0.680308	0.000410421	0.00034669	0.000384055	0.416989
ITGAM	0.730001	0.615067	0.866411	0.000570141	0.000347558	0.000317578	0.251344
C13orf3	1.66532	1.25723	2.20587	0.000510953	0.000347653	0.000376587	0.948646
ACE	0.227722	0.10086	0.514151	0.00028045	0.000347836	0.000369488	0.413291
PLEKHQ1	0.704605	0.581294	0.854073	0.000623497	0.000352693	0.000361098	0.272779
CD28	0.551318	0.396693	0.766212	0.00014654	0.000353084	0.000391618	0.369519
PVALB	0.568695	0.41704	0.775498	0.000235221	0.000355267	0.000361628	0.358458
FILIP1L	0.701862	0.577366	0.853202	0.000972739	0.000356008	0.000380098	0.275837
APBB1IP	0.745279	0.634249	0.875746	0.000960434	0.000362047	0.000354278	0.241496
MYO1F	0.674944	0.543824	0.837678	0.00034738	0.000362218	0.000360934	0.293854
LOC442423	0.267445	0.128962	0.554634	0.000220493	0.000363963	0.000394298	0.425672
LOC653741	0.239549	0.108771	0.527566	0.000286312	0.000364186	0.000388955	0.418796
MICB	0.711245	0.590172	0.857155	0.0008087	0.000364875	0.000345003	0.266983
OR3A1	0.353854	0.198448	0.630958	0.000287869	0.000368111	0.000430599	0.43251
RAI17	0.485399	0.325779	0.723226	0.000492223	0.000372174	0.000381349	0.397448
TMPRSS3	1.65413	1.24872	2.19117	0.000796355	0.000378013	0.000450897	0.942455
HLA-B	0.67862	0.546883	0.842091	0.00140081	0.000378318	0.000430361	0.295208
CSF2RA	0.488056	0.3274	0.727546	0.000472842	0.000383514	0.000429188	0.400146
LOC388419	1.55408	1.22009	1.97948	0.0016708	0.000396093	0.000355137	0.759394
EHD1	0.514662	0.35542	0.745251	0.000355878	0.00039742	0.000437059	0.389832
OAF	0.733632	0.617669	0.871366	0.00150587	0.000399475	0.000417932	0.253698
KLF2	0.656013	0.519581	0.828269	0.000505805	0.000402943	0.000394359	0.308688
TLR10	0.537252	0.379807	0.759963	0.000369028	0.000410328	0.000446045	0.380156
Pfs2	1.37285	1.15214	1.63583	0.000402884	0.000410812	0.000394484	0.483684
HLX1	0.560957	0.40589	0.775265	0.000513442	0.000412794	0.000461951	0.369374
ADH1A	0.85785	0.786991	0.935089	0.000804424	0.000412856	0.000490764	0.148098
ZBTB4	0.421346	0.26133	0.679342	0.000456398	0.000415306	0.000390559	0.418011
UBASH3A	0.418681	0.257378	0.681076	0.000256724	0.000416788	0.000452996	0.423697
FMOD	0.652788	0.514574	0.828124	0.000802657	0.000417275	0.000442037	0.31355
RAMP3	0.70484	0.580052	0.856474	0.000469884	0.000417396	0.000434214	0.276422
LEF1	0.595702	0.446526	0.794714	0.000450539	0.000417527	0.000427733	0.348188
TNFRSF14	0.541333	0.38499	0.761166	0.000444642	0.00041868	0.000416548	0.376176
ST8SIA5	1.70265	1.2758	2.27232	0.00126994	0.000424472	0.000301404	0.996515
LOC388681	0.573224	0.419754	0.782805	0.000672567	0.000429648	0.000464962	0.363051
SOX18	0.722	0.602059	0.865836	0.000732416	0.000430181	0.000441149	0.263778
CENPM	1.64182	1.24349	2.16775	0.000544778	0.000441888	0.000470544	0.924265
MATK	0.365896	0.210071	0.637306	0.000191591	0.000443256	0.000383497	0.427235
LOC653518	0.465251	0.303171	0.713981	0.000388028	0.000444944	0.00046224	0.41081
LBH	0.336279	0.182179	0.620728	0.000240866	0.000448816	0.000492562	0.438549
CCR6	0.327497	0.174579	0.61436	0.000432729	0.000449025	0.000505627	0.43978
CD40	0.605159	0.456477	0.802268	0.00065649	0.000455169	0.000480415	0.345791
CTSH	0.66041	0.52476	0.831126	0.000465438	0.000455195	0.000405036	0.306366
FAM113B	0.598367	0.448787	0.797802	0.000600781	0.000456496	0.000466806	0.349015
VAV1	0.705658	0.580425	0.857911	0.000893415	0.000457728	0.000469756	0.277486
SLC35D3	1.5206	1.19308	1.93802	0.00354381	0.00045868	0.000707975	0.744931
LOC648366	0.630952	0.487912	0.815926	0.000569769	0.000459458	0.000446713	0.328014
FLJ25102	1.53539	1.2045	1.95719	0.00104721	0.00045948	0.000535341	0.75269
PAPLN	0.692995	0.564509	0.850724	0.000831835	0.000459643	0.000456375	0.286215
GLYATL2	1.27075	1.10529	1.46097	0.00254451	0.000462075	0.000761136	0.355679
VIM	0.631677	0.487712	0.818139	0.000882509	0.000465445	0.000499614	0.330426
FLJ35784	1.67785	1.25445	2.24416	0.000697854	0.000472639	0.000487047	0.989714
C8orf51	1.45924	1.17852	1.80683	0.000754493	0.000476977	0.000526747	0.628309
LOC399753	0.181871	0.0694559	0.47623	0.000164645	0.000477246	0.000519574	0.406774
SMAP1L	0.543741	0.38521	0.767514	0.00057279	0.000484004	0.000531132	0.382304
GSTM5	0.608353	0.459496	0.805434	0.000197473	0.000485195	0.000518169	0.345937
LOC645335	0.271788	0.129732	0.569395	0.000593313	0.000489484	0.000555408	0.439664
UBE1L	0.611636	0.463494	0.807127	0.000479642	0.00048959	0.000512344	0.343633
GIMAP1	0.627355	0.48356	0.813911	0.000293271	0.000491779	0.0004479	0.330351
TRIM8	0.512644	0.351501	0.747662	0.000754161	0.000493306	0.000519821	0.396161
CIAS1	0.375505	0.216091	0.65252	0.000379835	0.000498065	0.000512339	0.436429
BCNP1	0.478805	0.314913	0.727993	0.000413762	0.000499484	0.000571115	0.413081
SH3KBP1	0.492948	0.330976	0.734186	0.000505395	0.000499687	0.000500968	0.40321
DCN	0.751058	0.638118	0.883988	0.000927421	0.00050487	0.000575155	0.24587
ICAM3	0.540948	0.382003	0.766028	0.00037336	0.000508556	0.000537027	0.384025
LOC606724	0.467965	0.304353	0.71953	0.000571443	0.000511566	0.000541055	0.415177
HIST2H2BF	1.48006	1.18273	1.85212	0.00129958	0.000513672	0.000610806	0.669389
PMS2L11	0.5045	0.342653	0.742793	0.000665582	0.00051477	0.000527441	0.40014
LOC653471	0.379824	0.220151	0.655307	0.00028232	0.00051621	0.000503607	0.435156
REM1	0.633504	0.48844	0.82165	0.000296295	0.000517802	0.000580616	0.333211
SYT4	1.21594	1.0819	1.36658	0.00549142	0.000524845	0.00103455	0.284683
FOXM1	1.46174	1.17855	1.81297	0.00042391	0.000527598	0.000549797	0.634418
ARID5A	0.380926	0.219737	0.660355	0.000566373	0.000535473	0.00058537	0.440618
TLN1	0.525643	0.364679	0.757655	0.000583574	0.000537934	0.000565258	0.392975
CCL5	0.678576	0.5451	0.844734	0.000557271	0.000537936	0.000520688	0.299634
HSPB6	0.711898	0.587899	0.862049	0.000247095	0.000540455	0.000501018	0.27415
LOC646706	0.296982	0.148334	0.594593	0.000644175	0.000541471	0.00060862	0.446259
STAT5A	0.554812	0.396331	0.776665	0.000456819	0.000543737	0.000597756	0.380333
CD69	0.714056	0.589157	0.865434	0.000575141	0.000544657	0.00059645	0.276277
LILRB2	0.43955	0.275481	0.701332	0.000465848	0.000546495	0.000564364	0.425851
NCF4	0.631776	0.486242	0.820867	0.000659871	0.000549705	0.000586899	0.334625
PLCL2	0.582844	0.428226	0.793288	0.000665211	0.000551827	0.000598527	0.365062
FGL2	0.784746	0.684178	0.900096	0.00132164	0.000553076	0.000531822	0.215918
GZMK	0.775437	0.670742	0.896473	0.000867354	0.00055422	0.000588684	0.225731
UNQ2541	1.35063	1.12661	1.6192	0.0068383	0.000560286	0.00116093	0.492588
FHL1	0.746376	0.632027	0.881413	0.000507159	0.000561372	0.000565417	0.249387
TNFAIP8L3	0.623694	0.4758	0.817557	0.00065643	0.000563906	0.000629376	0.341757
C17orf44	0.613006	0.464145	0.80961	0.000669116	0.000565956	0.00056466	0.345464
MGC33894	0.298978	0.149626	0.597409	0.000478772	0.000569521	0.000629547	0.447783
TMEM156	0.601431	0.450366	0.803167	0.000339689	0.000572939	0.000570594	0.3528
SPANXA1	1.28618	1.10423	1.49812	0.00651666	0.000573555	0.00122095	0.39389
LOC644192	0.387021	0.223981	0.66874	0.000343499	0.000574777	0.00066922	0.444758
FLJ23191	0.787591	0.686145	0.904035	0.00112381	0.00057629	0.000688856	0.21789
TRAT1	0.477917	0.312654	0.730536	0.000398116	0.000577871	0.000649217	0.417882
LOC439951	0.262152	0.121871	0.563904	0.000559629	0.000579078	0.000612881	0.442032
DSP	1.40816	1.15683	1.71409	0.000780931	0.000581089	0.000644204	0.557267
PTK6	1.47101	1.17822	1.83657	0.000515423	0.000582231	0.000653867	0.658349
LOC647540	0.333227	0.177116	0.626935	0.000487596	0.000586474	0.000654618	0.449819
CST7	0.686619	0.553723	0.851411	0.000673856	0.000587172	0.000613432	0.297688
RHOG	0.562176	0.404556	0.781207	0.000797618	0.000588124	0.000601795	0.376651
C20orf106	0.232396	0.100648	0.536602	0.000510892	0.000589047	0.000630918	0.435954
LOC644614	0.449765	0.284637	0.710691	0.000558488	0.000591263	0.00061932	0.426055
SH3BGRL3	0.52527	0.36292	0.760247	0.000809084	0.000595321	0.000642415	0.397327
CD53	0.740417	0.623623	0.879084	0.000814045	0.000600235	0.00060059	0.255462
CECR1	0.452306	0.286567	0.713903	0.000482201	0.00060173	0.000656199	0.427336
SLCO2B1	0.707502	0.580363	0.862493	0.000671818	0.00060641	0.000617885	0.28213
BNIP3	1.48496	1.18338	1.8634	0.000686154	0.000606517	0.00064101	0.680024
CLEC4A	0.742875	0.626575	0.880763	0.000733216	0.000607352	0.000622653	0.254188
FLJ38020	1.43325	1.16396	1.76484	0.00146631	0.000607931	0.000699304	0.600875
CRYBA2	1.41422	1.14876	1.74103	0.00577281	0.000609907	0.00108528	0.592267
TF	1.18693	1.07471	1.31088	0.00136921	0.000616053	0.000720537	0.236173
ECM2	0.659869	0.519651	0.837921	0.000600571	0.000619787	0.000647681	0.318269
HSPA12B	0.654605	0.512165	0.836661	0.000466076	0.000620903	0.000713397	0.324497
ITGA9	0.628232	0.480866	0.820759	0.000507948	0.000627609	0.000653916	0.339893
CSF1R	0.623762	0.476255	0.816955	0.000914625	0.000634932	0.000606803	0.3407
TNFSF13B	0.684617	0.550916	0.850766	0.000645891	0.000636439	0.000631195	0.299851
SH2D3A	1.59269	1.22046	2.07844	0.000814224	0.000636451	0.000610653	0.857984
RAMP2	0.593966	0.441323	0.799405	0.000458795	0.000638112	0.000587713	0.358082
LY9	0.536565	0.374076	0.769635	0.000422274	0.000638147	0.000717957	0.395559
LOC127406	0.323533	0.169028	0.619267	0.000493212	0.000643905	0.00065762	0.450239
PSG6	0.254941	0.103332	0.628989	1.01105e-05	0.000645841	0.00301495	0.525656
PDPN	0.538289	0.377112	0.768352	0.000530419	0.00065701	0.000646512	0.39124
LOC653571	1.21004	1.07885	1.35719	0.00515416	0.000658374	0.00112963	0.278342
TMEM88	0.683883	0.548627	0.852485	0.000600018	0.000665283	0.000726313	0.303858
NOD27	0.577484	0.419863	0.794277	0.000595973	0.000668686	0.000734982	0.374415
C1RL	0.552904	0.391899	0.780055	0.000971846	0.000672125	0.000739645	0.388156
GLRB	1.40352	1.15321	1.70817	0.000722264	0.000675364	0.000718924	0.554958
LMO2	0.67662	0.538969	0.849426	0.00079299	0.000679535	0.00076206	0.310457
FLJ10925	0.456892	0.29046	0.71869	0.000513243	0.000685843	0.000700926	0.42823
CD248	0.664755	0.525597	0.840758	0.000972207	0.000687578	0.00065607	0.315161
FUCA1	0.655894	0.513632	0.837558	0.0010059	0.000690254	0.000722226	0.323926
NCF1C	0.749981	0.635055	0.885704	0.000613973	0.0006957	0.000698636	0.250649
SVEP1	0.74879	0.633363	0.885253	0.000981054	0.000702759	0.000706995	0.251891
SYT1	1.43745	1.16276	1.77702	0.0012812	0.000705222	0.0007975	0.614255
LOC255130	0.337359	0.179632	0.633579	0.000551355	0.000707744	0.000726909	0.453947
FHL5	0.639209	0.49161	0.831124	0.000447515	0.000708977	0.000835227	0.339514
KLHL18	0.400436	0.235458	0.681007	0.000684224	0.000709656	0.000730247	0.445548
PPP1R16A	1.58339	1.21054	2.07109	0.000910145	0.000717675	0.000794672	0.86055
ADAMTS8	0.667025	0.526308	0.845365	0.000506007	0.000721352	0.000809445	0.319057
LRRC25	0.549062	0.38725	0.778486	0.000775975	0.00072219	0.000763626	0.391236
CLEC1A	0.715004	0.587769	0.869782	0.0012351	0.000728844	0.000792512	0.282012
PILRA	0.660088	0.518429	0.840455	0.000509232	0.000730957	0.000751199	0.322026
NBL1	0.652062	0.507747	0.837396	0.00099347	0.000737264	0.000807153	0.32965
NCF1	0.747817	0.630935	0.886352	0.000398023	0.000744006	0.000804552	0.255417
ARL6IP5	0.56462	0.404235	0.78864	0.00149514	0.000748215	0.000800343	0.384405
COX7B2	1.24319	1.0906	1.41714	0.00310081	0.000748863	0.00112235	0.326546
ALAS1	0.336946	0.178428	0.636294	0.000780095	0.00075147	0.000797201	0.457865
TRIM22	0.762143	0.650121	0.893467	0.00226081	0.000754829	0.000811775	0.243345
FLJ45832	0.396818	0.232084	0.678481	0.000508765	0.000755163	0.000731811	0.446397
LOC643903	0.347501	0.1873	0.644723	0.00065263	0.000761822	0.000802564	0.457422
ZYX	0.621774	0.470398	0.821864	0.00129408	0.000775574	0.000843415	0.351465
DHDH	0.723478	0.598477	0.874588	0.00109416	0.000784604	0.000824062	0.276112
CHN1	0.479668	0.311169	0.739411	0.00084775	0.00078751	0.000876996	0.428242
LOC641700	0.673669	0.534264	0.849449	0.000701117	0.000787567	0.000839845	0.315185
MAP7D2	1.34291	1.12857	1.59795	0.00106637	0.000788974	0.000889539	0.469377
GPR114	0.651445	0.50645	0.837953	0.000809772	0.000791877	0.000849128	0.331503
C14orf144	0.267755	0.123749	0.57934	0.000913739	0.000795294	0.000819444	0.455591
RASL12	0.663317	0.521097	0.844353	0.000772973	0.000796529	0.000855873	0.323257
PSAP	0.412244	0.245962	0.690943	0.000812591	0.00080113	0.000770952	0.444981
GPR82	0.317773	0.162245	0.62239	0.000390892	0.000806232	0.000830237	0.460145
FAM80B	1.38251	1.14482	1.66954	0.00115247	0.000808209	0.000765229	0.524726
HOXA3	0.258103	0.116324	0.572686	0.000492696	0.000810747	0.000866	0.456362
LOC554175	0.401869	0.236313	0.68341	0.000588118	0.00081847	0.000765185	0.447098
FZD3	1.42325	1.15675	1.75113	0.000858065	0.00082071	0.000848189	0.594382
PTGER4	0.757651	0.643765	0.891684	0.00130498	0.000826483	0.000839582	0.24792
LYZ	0.771626	0.662233	0.899089	0.000805559	0.00082705	0.000888382	0.236856
MOXD1	0.719302	0.592018	0.873952	0.00126607	0.000828037	0.000913404	0.281934
ZC3H12A	0.672174	0.532037	0.849224	0.000727664	0.000831642	0.000868451	0.317187
KIF14	1.53218	1.19212	1.96925	0.000761357	0.000833528	0.000861013	0.777134
PHF15	0.579828	0.419816	0.800827	0.000652643	0.000834698	0.000939359	0.381011
C8G	1.40625	1.14822	1.72226	0.00257668	0.000835518	0.000979853	0.574046
CFD	0.748326	0.630578	0.888062	0.000880197	0.00083564	0.00090331	0.257484
WNT8B	0.190173	0.0715456	0.505491	0.000643517	0.000839333	0.000875526	0.433945
GAB3	0.674765	0.534882	0.851229	0.00081471	0.000848497	0.000903796	0.316347
TACC1	0.585404	0.427553	0.801533	0.000883683	0.000849304	0.000838149	0.37398
FLJ23322	1.50633	1.18232	1.91912	0.00124103	0.000849706	0.000915361	0.736799
C2orf32	0.66526	0.522593	0.846874	0.00114343	0.000849791	0.000934507	0.324281
OPTN	0.551997	0.388499	0.784303	0.000812394	0.000852277	0.000914267	0.395804
EBI2	0.71727	0.589665	0.872488	0.000981643	0.000853588	0.000885082	0.282823
HLA-H	0.75088	0.633723	0.889695	0.00167557	0.000860596	0.000931706	0.255971
PTPRC	0.587579	0.428512	0.805693	0.000768067	0.000869166	0.000962313	0.377181
FGF11	1.36528	1.13402	1.6437	0.0013378	0.000871409	0.00100846	0.509678
BPIL1	1.33556	1.12323	1.58803	0.00263565	0.000875733	0.0010551	0.464806
FLJ11000	0.570893	0.409907	0.795104	0.000814539	0.000880204	0.000911507	0.385198
MGC33212	1.54906	1.19561	2.007	0.000699039	0.000882616	0.000926339	0.811385
BTN3A3	0.702417	0.569971	0.86564	0.0018563	0.000890942	0.000921585	0.295669
SAT2	0.552801	0.389654	0.784257	0.00128322	0.000892662	0.000894196	0.394603
CCL2	0.706333	0.574842	0.8679	0.000867198	0.000893359	0.000939627	0.293058
VAMP8	0.419308	0.251223	0.699852	0.00116933	0.000896037	0.000882781	0.448629
FAM64A	1.37958	1.14137	1.66751	0.000850955	0.000896039	0.000877164	0.526142
SYK	0.586589	0.428202	0.803562	0.000807373	0.000896962	0.000894033	0.37536
DNASE1	1.581	1.20467	2.07489	0.00150269	0.000898194	0.000958357	0.870217
SYT11	0.551411	0.388754	0.782125	0.00140506	0.000905172	0.000844091	0.393372
HLA-F	0.794454	0.690615	0.913906	0.00526801	0.000919614	0.00128341	0.223292
LST1	0.619123	0.465453	0.823526	0.000945628	0.000920886	0.000988272	0.358074
LOC90925	0.656812	0.511855	0.842821	0.000678839	0.000922656	0.000953026	0.330966
OSCAR	0.669966	0.529836	0.847159	0.000644361	0.000923739	0.000821816	0.317323
LXN	0.727973	0.602288	0.879885	0.00127783	0.000938361	0.00102609	0.277597
ID2	0.687283	0.552573	0.854833	0.00154072	0.000947694	0.000754127	0.30226
PNMA6A	1.48676	1.17188	1.88623	0.00192312	0.000948751	0.0010898	0.714347
HLA-DRB6	0.752904	0.635326	0.892241	0.00137265	0.000953842	0.0010526	0.256914
LOC203413	1.28781	1.10598	1.49954	0.00140267	0.000958859	0.00112593	0.393563
TARP	0.588433	0.428848	0.807403	0.000663924	0.000960251	0.00101856	0.378555
RARRES3	0.69932	0.56461	0.866171	0.000974397	0.000961821	0.00105297	0.301562
LOC652793	0.476172	0.305045	0.743298	0.00083787	0.00096541	0.00109219	0.438253
APOC4	0.449719	0.282456	0.716029	0.000400206	0.000966081	0.000758207	0.433572
KCNMB1	0.716008	0.587459	0.872687	0.001784	0.000966635	0.000937135	0.285228
LOC441261	0.377117	0.210172	0.676671	0.000950925	0.000967794	0.00107797	0.466499
KLHDC8B	0.561911	0.398526	0.79228	0.00100543	0.00097274	0.00100813	0.393754
RARRES2	0.699515	0.564316	0.867105	0.00130613	0.000975174	0.00110924	0.30279
ATP8B1	1.49777	1.1757	1.90806	0.00123018	0.000978054	0.0010742	0.732359
OR2Y1	0.307173	0.151269	0.623761	0.000829201	0.000979204	0.00109109	0.472492
SIPA1	0.535768	0.372001	0.771632	0.00101468	0.000979406	0.000799969	0.399631
SLC9A9	0.721612	0.593462	0.877433	0.001391	0.000981159	0.00107268	0.283971
TNFRSF1B	0.702809	0.570563	0.865707	0.001939	0.000981272	0.000913727	0.295144
AACS	1.65032	1.22559	2.22225	0.00102451	0.000982669	0.000967217	0.996663
LDB2	0.67246	0.530275	0.85277	0.000963499	0.000983029	0.00106021	0.322495
LOC374973	0.338227	0.176437	0.648376	0.00104965	0.000986176	0.00109484	0.471939
ZAP70	0.42312	0.253858	0.705241	0.000710559	0.000986241	0.000967858	0.451383
PLXDC2	0.765579	0.653237	0.897243	0.00249109	0.000987683	0.000969866	0.244006
LOC650919	0.571983	0.409251	0.799423	0.001088	0.000989876	0.00107328	0.390172
PLK1	1.57606	1.20221	2.06616	0.00207003	0.000990734	0.000991118	0.863953
C16orf78	0.269744	0.12301	0.591512	0.000891713	0.000992719	0.00107317	0.468502
DSG2	1.34755	1.12878	1.60871	0.000587686	0.000993333	0.000966111	0.479935
RRM2	1.35839	1.12964	1.63344	0.00108199	0.00099874	0.00113121	0.503802
ZNF218	0.663379	0.521552	0.843774	0.00120259	0.00100756	0.000825466	0.322222
LAPTM5	0.6759	0.535283	0.853457	0.00133744	0.00101705	0.000996597	0.318173
EMILIN1	0.68068	0.540669	0.856947	0.00134986	0.00101883	0.00106074	0.316278
PRB4	1.3238	1.11255	1.57517	0.0067827	0.00102236	0.00156473	0.462613
TGFBR2	0.71503	0.584227	0.875118	0.00292139	0.00102675	0.00113767	0.290891
FCGRT	0.59911	0.442429	0.811278	0.000992992	0.00103171	0.000926035	0.368849
PRICKLE2	0.735863	0.610934	0.886338	0.003375	0.00103458	0.00123358	0.275404
HAVCR2	0.654134	0.507041	0.8439	0.00127475	0.00103861	0.00109119	0.336859
PITPNM2	0.662203	0.517163	0.847918	0.000708916	0.00104536	0.00108349	0.330755
CXCR6	0.762664	0.647666	0.898082	0.00128203	0.00105426	0.00115813	0.250416
GPX3	0.710039	0.577665	0.872747	0.000919362	0.00105473	0.00114228	0.295082
RASSF4	0.637241	0.486484	0.834716	0.000965317	0.00106608	0.00106906	0.348233
DOK3	0.665764	0.520464	0.851628	0.000981521	0.00107201	0.00120184	0.331164
LOC440871	0.669847	0.525696	0.853524	0.000552833	0.00108053	0.0011912	0.327828
HOM-TES-103	0.419264	0.247967	0.708894	0.000924001	0.00108157	0.00117909	0.460927
TCL1A	0.632581	0.478919	0.835544	0.000650373	0.00108314	0.0012578	0.356625
CETP	0.462765	0.291715	0.734113	0.000856906	0.00108429	0.0010648	0.442399
C1QR1	0.754504	0.636343	0.894606	0.0019727	0.0010864	0.0011888	0.258263
PLA2G4C	0.680465	0.540625	0.856476	0.00121539	0.00109057	0.00103836	0.31585
LOH3CR2A	0.698093	0.561822	0.867417	0.000742034	0.00109181	0.00118006	0.305595
LOC652628	0.463521	0.292192	0.735308	0.00103705	0.00109255	0.00109106	0.443116
IL2RB	0.789488	0.684858	0.910104	0.00166549	0.00110185	0.00111992	0.225246
DENND3	0.662972	0.517651	0.84909	0.00177934	0.00111394	0.00113076	0.33144
CELP	1.60823	1.21377	2.13088	0.00390398	0.00111709	0.000935197	0.917109
NKG7	0.796413	0.694486	0.913298	0.00133833	0.00112373	0.00112216	0.218812
HCK	0.769293	0.656541	0.901409	0.00171032	0.00113281	0.00118034	0.244867
STX11	0.779664	0.671222	0.905626	0.00204626	0.00113593	0.00112489	0.234404
HLA-A	0.631406	0.476246	0.837116	0.00416287	0.00113644	0.0013954	0.36087
SH3PXD2A	0.542884	0.376651	0.782484	0.00160781	0.00114801	0.00105665	0.405833
TRIM9	1.50226	1.173	1.92395	0.0022931	0.00115642	0.00126396	0.750946
CTLA4	0.594641	0.433777	0.815161	0.000802974	0.00116116	0.00123855	0.381384
BLR1	0.512114	0.341233	0.768569	0.00066437	0.00116555	0.00123473	0.427336
LOC643713	0.522135	0.351833	0.774871	0.000927292	0.00116589	0.00125407	0.423038
SEMA4A	0.62151	0.465988	0.828937	0.00125316	0.00116832	0.00120888	0.362949
PLA2G7	0.72657	0.599143	0.881099	0.000977603	0.00116972	0.00116806	0.281956
SLAMF6	0.676597	0.533663	0.857814	0.00105028	0.00116985	0.00125253	0.324151
AMACR	1.53842	1.19093	1.9873	0.00247046	0.00117553	0.000975009	0.796369
FAM13C1	0.311826	0.153984	0.631465	0.000329326	0.00118015	0.00120823	0.47748
GMIP	0.628553	0.47491	0.831901	0.00175445	0.00118942	0.00116675	0.35699
KIF21B	0.272539	0.12493	0.594554	0.00123521	0.00119257	0.00108917	0.469623
MAP3K3	0.426467	0.254334	0.715098	0.000928263	0.00120183	0.00123136	0.460764
TAGLN	0.565013	0.398833	0.800435	0.00176429	0.00120683	0.00131556	0.401602
GBP2	0.618968	0.461852	0.829532	0.00116885	0.00121081	0.00132291	0.367681
CD7	0.735312	0.609722	0.88677	0.00097738	0.0012112	0.00129305	0.277048
ALAD	0.224533	0.090224	0.558779	0.0012955	0.0012292	0.00132226	0.468555
MAN2B1	0.565343	0.400284	0.798466	0.000862592	0.00123274	0.00120538	0.398182
CASP1	0.601869	0.441579	0.820343	0.0015276	0.00123487	0.0013122	0.378764
CD79A	0.69754	0.560063	0.868761	0.000917314	0.0012351	0.00129929	0.308698
LOC440016	0.336144	0.173498	0.651266	0.00109	0.00124181	0.00123441	0.477768
LOC645868	0.408612	0.236505	0.705962	0.00125929	0.00124246	0.00133637	0.469456
LOC285513	0.655883	0.507439	0.847753	0.00110304	0.00124631	0.0012752	0.340314
SELP	0.552757	0.385378	0.792835	0.000851372	0.00125168	0.00127574	0.407457
PTPN22	0.520238	0.348941	0.775627	0.00100377	0.0012546	0.00134189	0.426686
GJC1	0.560173	0.395397	0.793618	0.00205925	0.00125795	0.00111213	0.398221
OXER1	0.550664	0.383303	0.791098	0.000918865	0.00126899	0.00124807	0.407795
ST8SIA4	0.604911	0.445154	0.822003	0.00173813	0.00127158	0.00131479	0.376849
C3orf29	0.544746	0.376421	0.788341	0.00210473	0.00127791	0.00127703	0.41192
EHD4	0.556481	0.388357	0.797387	0.00185433	0.00128413	0.00140489	0.409031
LOC442535	0.669695	0.523724	0.856351	0.00111795	0.00128466	0.00139245	0.332627
NPR2	0.396959	0.225536	0.698677	0.00108638	0.00128708	0.00135986	0.473141
LOC283278	0.371532	0.202555	0.681474	0.0009906	0.0012964	0.00137895	0.478919
CLIC5	0.802984	0.701713	0.91887	0.00166591	0.00130916	0.00142222	0.217157
ESAM	0.749897	0.62943	0.893421	0.00225184	0.00131121	0.00127621	0.263991
AGTRL1	0.767525	0.652694	0.902558	0.00232411	0.00132109	0.00137494	0.249864
SPRED1	0.526115	0.356193	0.777098	0.0015751	0.00132172	0.00125008	0.420905
LOC644683	0.353106	0.186664	0.667955	0.00066066	0.00132513	0.00137094	0.481291
CCL17	0.683247	0.540494	0.863702	0.000470276	0.0013272	0.00144595	0.323208
TCIRG1	0.294232	0.138921	0.623174	0.0012832	0.00133297	0.00139778	0.484253
SLD5	1.62884	1.20852	2.19535	0.0014316	0.00135583	0.00135692	0.986827
C17orf66	0.318648	0.157453	0.644869	0.00121775	0.00136709	0.00147437	0.487416
LOC642883	0.438046	0.26459	0.725213	0.00121991	0.00137107	0.00133173	0.460623
MUC2	1.57768	1.19137	2.08924	0.00322556	0.00137309	0.0014626	0.897866
STK10	0.665202	0.520046	0.850875	0.00211708	0.00138062	0.00117164	0.33083
MID1IP1	0.689322	0.548202	0.86677	0.00183728	0.00138204	0.00145569	0.318567
NCF1B	0.558901	0.390497	0.799931	0.000696925	0.0013828	0.00147166	0.409434
MFSD1	0.622959	0.465477	0.833722	0.00187111	0.00138418	0.00145733	0.368245
CACNA1E	1.43869	1.14611	1.80597	0.00486019	0.00138706	0.00171527	0.659862
ARHGAP30	0.657195	0.508108	0.850025	0.00168346	0.00139169	0.00138485	0.341916
DKFZp762E1312	1.33957	1.11874	1.60401	0.00113239	0.00141973	0.00146957	0.485272
TCF21	0.739558	0.613578	0.891404	0.00110849	0.00142016	0.00154288	0.277826
JAM2	0.7096	0.574415	0.876599	0.00211595	0.00142243	0.00146594	0.302185
IGFBP1	1.41601	1.13354	1.76887	0.0091197	0.00142724	0.00218303	0.635329
LOC653261	0.584724	0.419599	0.814832	0.000737007	0.00144498	0.0015274	0.395232
SPATA20	0.58189	0.41786	0.81031	0.00104662	0.00144617	0.0013509	0.39245
RASGRP1	0.729302	0.600037	0.886414	0.00207832	0.00145053	0.00151789	0.286376
PTGIS	0.780313	0.668759	0.910475	0.00248708	0.00146252	0.00162425	0.241716
RAB39	0.318422	0.157453	0.643955	0.00117463	0.00147038	0.00144825	0.486502
CCL23	0.681104	0.538121	0.862078	0.00111881	0.00147101	0.00140111	0.323957
ADRA2A	0.626794	0.469969	0.835951	0.00132192	0.00147375	0.00147477	0.365982
BTBD4	0.628257	0.471918	0.836388	0.0016219	0.00148411	0.00145391	0.36447
LRRK2	0.680838	0.535968	0.864865	0.00117862	0.00148938	0.00163657	0.328897
SEMA4D	0.589307	0.426053	0.815115	0.00182819	0.00149158	0.00139763	0.389061
GPR132	0.687271	0.544404	0.867631	0.00193857	0.00149475	0.0016096	0.323227
KIAA0513	0.602111	0.440895	0.822279	0.0020414	0.00149873	0.00141968	0.381384
FAM26B	0.683501	0.539212	0.866401	0.00194702	0.00151638	0.001659	0.327189
HLA-DRB4	0.811632	0.712426	0.924652	0.00155376	0.00153108	0.00170286	0.212225
LOC644474	0.572834	0.405015	0.81019	0.00108131	0.00153119	0.00163283	0.405176
LOC389111	0.449447	0.27472	0.735304	0.000982569	0.00153645	0.00145171	0.460583
POMC	0.514736	0.339189	0.781139	0.000600522	0.00154623	0.00180457	0.44195
CCR1	0.729035	0.599395	0.886715	0.00142646	0.00155047	0.00155896	0.28732
HIST3H2A	1.28594	1.10002	1.50328	0.00135667	0.00155441	0.00159713	0.403257
LOC643734	0.331131	0.166047	0.660342	0.00112917	0.00156366	0.00169894	0.494294
C22orf18	1.38081	1.12895	1.68886	0.0010409	0.00156993	0.0016871	0.559912
FLJ11795	0.499861	0.323323	0.772792	0.000837617	0.00157174	0.00181178	0.449469
LOC131873	0.800468	0.696366	0.920134	0.0017097	0.00157223	0.0017426	0.223768
MELL1	1.40489	1.13568	1.73792	0.00203963	0.00157386	0.00173517	0.602243
POU2AF1	0.778265	0.665721	0.909834	0.00163404	0.00157794	0.00165702	0.244112
FLJ40365	0.297635	0.14048	0.630599	0.000911392	0.00158945	0.00155818	0.490119
LOC284988	0.634767	0.479321	0.840625	0.00178547	0.0016007	0.00151719	0.361303
PRC1	1.53438	1.17304	2.00703	0.001291	0.00160355	0.00177879	0.83399
COX7A1	0.650393	0.497058	0.851029	0.00167701	0.00161386	0.00171361	0.353972
PLA2G5	0.573394	0.404892	0.812019	0.00152087	0.00161466	0.00173086	0.407127
KCTD12	0.654519	0.504382	0.849347	0.0035344	0.00161844	0.00143162	0.344965
POPDC3	1.4621	1.15373	1.85289	0.00394332	0.00162301	0.001671	0.69916
FGD3	0.607556	0.445122	0.829266	0.00144568	0.00162415	0.00169268	0.384144
FCN1	0.780512	0.668709	0.911008	0.00196349	0.00162802	0.00168055	0.242299
CMKLR1	0.727377	0.596094	0.887575	0.00102535	0.00163548	0.00172263	0.291481
LOC642856	0.389027	0.21454	0.705425	0.00123011	0.00164878	0.00187628	0.490885
PRPF8	0.505693	0.330087	0.774722	0.00125951	0.00167076	0.00173173	0.444635
TMEM48	1.52755	1.17226	1.99054	0.00175698	0.00167816	0.00170924	0.818283
CCDC69	0.602717	0.43944	0.82666	0.00162073	0.00168226	0.0016845	0.387221
CUGBP2	0.628308	0.4696	0.840653	0.00196168	0.00168844	0.00175733	0.371053
WASPIP	0.72958	0.599944	0.887229	0.00219673	0.00169258	0.0015847	0.287285
NCOA1	0.39974	0.22494	0.710376	0.00261647	0.00171213	0.00177427	0.485435
TNIP1	0.463975	0.286442	0.751538	0.00244272	0.00171255	0.001804	0.465096
ZNF664	1.54681	1.17653	2.03361	0.00217254	0.00171737	0.00178119	0.857078
KIAA0323	0.548117	0.375735	0.799586	0.00177632	0.00171866	0.00180312	0.423851
ZNF643	1.62815	1.20892	2.19275	0.00466151	0.00172048	0.00133197	0.983833
FLJ22688	1.6138	1.19476	2.1798	0.00157834	0.00172615	0.00180839	0.985046
C16orf30	0.644434	0.488533	0.850086	0.00189789	0.00174486	0.00187513	0.361552
OR1C1	0.431868	0.255712	0.729375	0.00112981	0.00174567	0.00168859	0.473663
ANXA6	0.654155	0.501172	0.853836	0.0027529	0.00175726	0.00179296	0.352664
TRIM38	0.721521	0.588324	0.884873	0.0039454	0.00176576	0.00172084	0.296549
LHFP	0.657844	0.505062	0.856843	0.00186312	0.00176586	0.00189799	0.351781
GBP4	0.787794	0.67927	0.913656	0.00334287	0.00177598	0.00161013	0.234386
ALDH1A2	0.735255	0.605454	0.892884	0.00133546	0.0017903	0.00191445	0.287431
KIAA0240	0.474725	0.297299	0.758037	0.00173663	0.00179187	0.00180768	0.460738
CALCRL	0.738549	0.611511	0.891978	0.00219598	0.00179254	0.00164977	0.280467
HLA-DRB3	0.799764	0.69556	0.919579	0.00318372	0.00179563	0.00170655	0.224019
COL6A1	0.731926	0.601609	0.890472	0.00252551	0.00180153	0.00181125	0.288863
DEF6	0.571673	0.40287	0.811204	0.00155984	0.00180382	0.00173726	0.408334
LOC651922	0.309991	0.147422	0.651834	0.00123997	0.00180498	0.00201157	0.504413
HLA-DQA1	0.781508	0.669098	0.912803	0.00236307	0.00180654	0.00186174	0.243704
OACT5	0.534317	0.36022	0.792557	0.00195655	0.00181352	0.00183513	0.432337
IL16	0.547207	0.374714	0.799105	0.000867676	0.00181358	0.00180396	0.424392
KCNMA1	0.468991	0.29174	0.753936	0.0016171	0.00182514	0.00177145	0.462196
MMP23B	0.559353	0.387971	0.80644	0.00167699	0.001848	0.00185537	0.418469
PFKP	1.49486	1.15955	1.92713	0.00210514	0.00184972	0.00192074	0.767582
CD8A	0.735991	0.606467	0.893178	0.0020063	0.00185247	0.00191034	0.286711
LOC196463	0.669686	0.519249	0.863709	0.00289886	0.00187734	0.0020105	0.34446
RAI2	0.518656	0.347484	0.774148	0.000768409	0.00188591	0.00131508	0.426664
LOC442316	0.41267	0.235272	0.72383	0.00158436	0.00189223	0.00201986	0.488559
CDCA8	1.43802	1.14461	1.80664	0.00119515	0.00189774	0.00180842	0.662029
LOC653576	0.319921	0.155037	0.660161	0.00147665	0.00189926	0.00204565	0.505124
FCER2	0.455426	0.275947	0.751642	0.00140583	0.00191059	0.0020924	0.475695
HIST1H2BE	1.51371	1.16251	1.97102	0.00274847	0.00192634	0.00208448	0.808518
TMEM106A	0.537605	0.362474	0.797352	0.00211689	0.00192675	0.00202868	0.434878
POU3F1	0.311676	0.148562	0.65388	0.00124958	0.00192817	0.00204433	0.505318
HS3ST2	0.806338	0.70344	0.924289	0.00138296	0.00192873	0.00199979	0.220849
YBX2	1.26087	1.0877	1.46162	0.0030418	0.00193184	0.00210368	0.37392
CLEC12A	0.619495	0.457027	0.839717	0.00136434	0.0019379	0.00203112	0.382689
NFKB1	0.409063	0.232852	0.71862	0.00199045	0.0019417	0.00187523	0.485768
APOB48R	0.666649	0.515792	0.86163	0.00180729	0.00194198	0.00195033	0.345838
C18orf16	0.508213	0.331624	0.778835	0.00173572	0.00194888	0.00188643	0.447211
MSN	0.588689	0.420067	0.825	0.0028503	0.00195178	0.00208975	0.404934
CXCR3	0.732547	0.600672	0.893375	0.00140672	0.00196335	0.00211666	0.292702
TEK	0.778078	0.663378	0.912611	0.00280126	0.00197003	0.00204382	0.249233
EGR2	0.691499	0.547042	0.874102	0.0019008	0.00197475	0.00203282	0.32706
MAN2B2	0.52949	0.353684	0.792684	0.00234365	0.00197613	0.00201199	0.439
TBXAS1	0.753543	0.629255	0.90238	0.00297397	0.0019789	0.00209166	0.273125
PODN	0.701937	0.561317	0.877784	0.00175075	0.00199738	0.00191698	0.316467
XRCC4	0.340379	0.171697	0.674782	0.00132312	0.00200293	0.00202469	0.503085
DNAJB12	0.361409	0.189138	0.690587	0.00241682	0.00200738	0.00206628	0.501448
LOC648694	0.429145	0.250045	0.73653	0.00213317	0.00201651	0.00214353	0.486484
LOC285095	1.57328	1.17881	2.09974	0.00495006	0.00201705	0.00209117	0.920927
FLJ90805	1.30657	1.10063	1.55104	0.00333999	0.0020187	0.00224572	0.450409
CD300LF	0.788745	0.67857	0.916808	0.00295019	0.00202374	0.00199189	0.238238
MBP	0.608214	0.443544	0.83402	0.00146448	0.00202582	0.00202426	0.390476
CST9	1.55832	1.17297	2.07027	0.00175028	0.00204088	0.00220817	0.897306
LOC441461	1.5486	1.17105	2.04787	0.00202696	0.00204883	0.00215884	0.876815
LOC647152	1.54944	1.17097	2.05025	0.00300579	0.00206542	0.00218017	0.879275
UCP2	0.705852	0.565536	0.880981	0.00281076	0.00206659	0.00206593	0.315445
C15orf41	1.57623	1.18264	2.1008	0.0024308	0.00208115	0.00190644	0.918159
COL4A1	0.599367	0.431527	0.832487	0.00288025	0.00208567	0.0022605	0.40096
PMP22	0.625307	0.462727	0.84501	0.00236672	0.00208831	0.00224188	0.382283
LOC649189	0.452717	0.272972	0.750817	0.0017886	0.00209337	0.00213848	0.477845
DCAL1	0.763054	0.641476	0.907673	0.00180874	0.00209996	0.00225872	0.266197
SLA	0.695029	0.550694	0.877194	0.00219869	0.00211214	0.00218977	0.3265
PIP5K2A	0.672624	0.522137	0.866484	0.00276413	0.00211338	0.00214734	0.344347
C4orf7	0.82566	0.730018	0.933834	0.00237585	0.00211425	0.00229006	0.203816
BLM	1.54499	1.16967	2.04076	0.00238767	0.00211577	0.00218631	0.871089
LOC648064	0.444715	0.264199	0.748572	0.00231463	0.00212851	0.00228892	0.484373
TPX2	1.34741	1.11323	1.63086	0.00164359	0.00212992	0.00220518	0.517631
DGKZ	0.197435	0.0699709	0.557095	0.00146822	0.00213415	0.00217438	0.487124
LOC653108	1.35652	1.1153	1.64991	0.00171181	0.00215205	0.00227119	0.534609
FOXRED2	1.43388	1.13761	1.8073	0.00383081	0.0021603	0.00227476	0.669682
IRF6	1.3618	1.1172	1.65996	0.00362181	0.0021646	0.00223467	0.542754
ATG7	0.52881	0.351206	0.796228	0.00205166	0.00217076	0.00227893	0.445023
FOXF2	0.649014	0.492051	0.856049	0.0023772	0.0021794	0.00221173	0.363998
AGT	1.25612	1.08499	1.45425	0.0035622	0.0022058	0.00227666	0.369261
C7orf13	1.42995	1.13465	1.8021	0.00271784	0.00220736	0.00244287	0.667452
MERTK	0.7289	0.594935	0.893031	0.00402991	0.00220999	0.00227464	0.298096
PODXL	0.507522	0.329375	0.782022	0.00383732	0.00221001	0.0021079	0.452647
PGK2	0.274189	0.120117	0.625889	0.00189404	0.0022155	0.00212129	0.505772
LOC653703	0.296334	0.138542	0.63384	0.000885102	0.00221635	0.00171647	0.495298
LY96	0.630085	0.467638	0.848962	0.00202517	0.00221989	0.00239489	0.381324
NOTCH2	0.347765	0.176608	0.684795	0.00216242	0.00222875	0.00224922	0.508186
LOC652002	0.550908	0.376637	0.805816	0.00157398	0.00223851	0.00212134	0.429178
CRTAP	0.525306	0.346584	0.796189	0.0035169	0.00224465	0.00241201	0.449604
NEK2	1.43955	1.13856	1.82011	0.00221637	0.00224493	0.00233281	0.681553
IGJ	0.84953	0.764551	0.943955	0.00341907	0.00224594	0.00242492	0.179403
LOC642653	0.342084	0.171399	0.68274	0.00175561	0.00225487	0.00234726	0.51134
PDCD4	0.503485	0.324224	0.78186	0.00286209	0.00226927	0.00224449	0.457636
PLAC9	0.760038	0.63654	0.907497	0.00239873	0.00227258	0.00242267	0.270957
VGLL3	0.71594	0.576526	0.889068	0.00246154	0.00228366	0.0024942	0.312543
ZNFN1A4	0.479429	0.299124	0.768416	0.00131721	0.00228721	0.00225484	0.469292
CLEC3B	0.800808	0.693312	0.924971	0.00209426	0.00229743	0.00252381	0.231659
DDX17	0.686933	0.540477	0.873076	0.00246322	0.00231614	0.00214475	0.332599
GJA4	0.744429	0.614837	0.901335	0.00333573	0.00233362	0.00249068	0.286498
HEM1	0.715368	0.576076	0.888339	0.00234824	0.00233979	0.00243289	0.312263
PRRX1	0.541534	0.364115	0.805401	0.00254499	0.00234455	0.00245716	0.441286
LOC650783	0.361083	0.186471	0.699201	0.00172782	0.0023494	0.00251761	0.51273
C9orf19	0.647635	0.488529	0.858559	0.00237671	0.00235411	0.00252652	0.370029
PRB3	1.28117	1.08735	1.50953	0.00966709	0.00236679	0.00306999	0.422175
C1QA	0.79415	0.684763	0.921012	0.00326289	0.0023686	0.00230245	0.236249
TTN	0.197226	0.0696248	0.558683	0.00129662	0.0023705	0.00224447	0.489058
NLGN2	0.695076	0.549333	0.879485	0.00359644	0.00237675	0.002449	0.330152
HMCN1	0.435766	0.253821	0.748134	0.00243425	0.00237734	0.0025933	0.494313
BANK1	0.776168	0.658426	0.914966	0.00278867	0.00238305	0.00253868	0.25654
MMP23A	0.678903	0.528279	0.872473	0.00212704	0.00238411	0.00247925	0.344195
LOC646176	0.333261	0.163488	0.679334	0.00226843	0.00239487	0.00249444	0.515847
THAP5	0.199197	0.070276	0.564621	0.00161238	0.00239924	0.00240324	0.494345
NECAP2	0.500377	0.320075	0.782244	0.00326166	0.00242179	0.00238736	0.462169
C20orf194	0.375752	0.200033	0.705831	0.00213084	0.00242257	0.00234217	0.505799
LOC653744	0.458388	0.275942	0.761463	0.00203629	0.00244252	0.00259225	0.485521
GUCA1C	1.37593	1.11873	1.69227	0.00614409	0.00244984	0.00250677	0.573549
SPINT2	1.55216	1.16904	2.06084	0.00219936	0.00245071	0.00236699	0.891803
HNMT	0.548887	0.372283	0.809269	0.00284179	0.00246218	0.00245919	0.436986
ABTB2	1.40819	1.12684	1.75981	0.00277304	0.0024667	0.00261259	0.632971
BEAN	0.569245	0.393742	0.822975	0.00228552	0.00247011	0.00273642	0.429233
EMCN	0.704029	0.560057	0.885013	0.00246821	0.00247568	0.00264321	0.324956
DOCK11	0.741166	0.610839	0.899298	0.00384622	0.00248401	0.00239994	0.288458
CXorf21	0.400581	0.221004	0.726072	0.00218822	0.00248799	0.00257077	0.505068
FPRL2	0.719565	0.58105	0.8911	0.00303885	0.00249201	0.00255389	0.310051
PPFIA4	1.3885	1.12122	1.71951	0.00346048	0.00249275	0.00262279	0.598289
KIAA1893	1.4465	1.13729	1.83977	0.00396874	0.00250157	0.00262625	0.702484
LOC645325	0.411254	0.230264	0.734505	0.00242686	0.00250687	0.00267608	0.504241
LYPD3	1.22479	1.07259	1.3986	0.00388957	0.00252653	0.00274506	0.326016
BTN2A2	0.518329	0.338375	0.793986	0.00191154	0.00253067	0.00252612	0.455612
GNGT2	0.666685	0.511627	0.868737	0.00325498	0.00253102	0.00268393	0.35711
TGOLN2	0.542399	0.36325	0.809902	0.00352108	0.00253977	0.00278314	0.446651
MBNL1	0.608615	0.440572	0.840751	0.00652004	0.00254241	0.00259402	0.400179
GIPC2	0.289656	0.12934	0.648683	0.0021685	0.00254536	0.00259437	0.519343
FST	1.25374	1.08048	1.45478	0.00553658	0.00254917	0.00288159	0.374293
PLUNC	1.12346	1.0407	1.2128	0.00363323	0.00255191	0.00286573	0.172103
PTGER2	0.741615	0.60974	0.902011	0.00280658	0.00255961	0.0027688	0.292271
ATXN1	0.605903	0.436822	0.840428	0.00310311	0.0025635	0.00268804	0.403606
SMC2L1	1.38894	1.12079	1.72124	0.00320835	0.00256387	0.00268325	0.600453
KIF17	0.565131	0.389491	0.819973	0.0021049	0.00257748	0.0026548	0.430482
APOL3	0.457582	0.276324	0.757739	0.00423283	0.00258076	0.00238179	0.481415
SNRK	0.46954	0.287358	0.767226	0.00324176	0.00258932	0.00254764	0.479868
LOC642161	0.588477	0.415928	0.83261	0.00193519	0.00260008	0.00274808	0.416682
Septin 1	0.575987	0.403063	0.823099	0.00155714	0.0026037	0.00245534	0.420036
GNG2	0.69538	0.548148	0.882157	0.00350681	0.00260985	0.00276334	0.334009
C20orf100	0.674598	0.522187	0.871493	0.00243068	0.00262905	0.00258965	0.349306
JAK2	0.586043	0.412809	0.831975	0.00258137	0.00263786	0.00280002	0.419166
RBMS2	0.578489	0.403973	0.828394	0.00269888	0.00263926	0.00281175	0.424421
ABR	0.391794	0.212269	0.723149	0.00253399	0.00265744	0.00273051	0.510879
ADAM19	0.383884	0.205734	0.716298	0.00247919	0.00266609	0.0026264	0.510564
ITGB7	0.712518	0.571305	0.888636	0.00259081	0.00267094	0.00263303	0.317331
STAMBPL1	0.754742	0.62711	0.90835	0.00799328	0.00267818	0.0029112	0.28124
MAP3K8	0.765007	0.64213	0.911397	0.00463755	0.00268455	0.00271321	0.269267
FYB	0.618519	0.452123	0.846153	0.0023679	0.00268725	0.00265754	0.394029
PTPRE	0.618127	0.450591	0.847955	0.00376817	0.00268882	0.00285924	0.397364
LOC81691	1.54148	1.15914	2.04994	0.00413958	0.00268989	0.00292648	0.890791
LOC649813	0.436102	0.252407	0.753484	0.00309752	0.00269236	0.00293496	0.501077
KLK12	1.19547	1.0622	1.34545	0.00565677	0.00269284	0.00307099	0.283257
LOC63920	1.43848	1.13419	1.82439	0.00272185	0.00269402	0.00271377	0.690197
C1S	0.719346	0.579286	0.89327	0.00311737	0.0026949	0.00286816	0.313984
NFIX	0.725598	0.587892	0.895561	0.00222081	0.00269575	0.00281507	0.307669
AOX1	0.72027	0.580407	0.893835	0.00302327	0.00269982	0.0028933	0.313428
C22orf25	0.679412	0.529018	0.872562	0.00453108	0.00272763	0.00246316	0.343543
GZMA	0.808129	0.702947	0.929049	0.00389118	0.00273796	0.0027499	0.226102
GBP5	0.799131	0.690238	0.925204	0.00303884	0.00275753	0.00269884	0.234966
RGC32	0.713793	0.571356	0.89174	0.00280611	0.00277251	0.00298846	0.320384
CDKN2A	1.30159	1.09286	1.55019	0.00357744	0.00281666	0.00312024	0.457333
HSD11B1	0.699142	0.552001	0.885505	0.00175007	0.00282198	0.00299241	0.333504
LOC643189	0.381753	0.202194	0.72077	0.00245082	0.00282593	0.0029805	0.518576
NID2	0.590405	0.417693	0.834531	0.00243552	0.00282687	0.00284103	0.416837
CYYR1	0.70035	0.553598	0.886003	0.00324514	0.00283803	0.00298939	0.332405
POLQ	1.50606	1.15051	1.9715	0.0021761	0.00284719	0.00287902	0.820995
CRYAA	0.432938	0.249462	0.751358	0.00208065	0.00287283	0.00291736	0.501896
ITGA4	0.653801	0.494215	0.86492	0.00400497	0.00287454	0.00291677	0.370706
LOC644760	1.35121	1.10473	1.65267	0.00885273	0.0028797	0.00339709	0.547936
SNRPN	0.656212	0.496073	0.868045	0.00453357	0.00288382	0.0031636	0.371972
LOC644281	0.510169	0.32749	0.794749	0.00201102	0.00288908	0.0029232	0.467259
GEMIN5	1.51873	1.15431	1.99821	0.00236048	0.00290965	0.00283508	0.843896
RAB8B	0.689379	0.539176	0.881427	0.004086	0.00291847	0.00301141	0.342251
BTN3A2	0.76318	0.638603	0.912059	0.00622169	0.00292237	0.00295535	0.273455
MAP6D1	1.55462	1.16017	2.08318	0.00476073	0.00292789	0.0031276	0.923013
C1orf155	1.50462	1.15123	1.96649	0.00191394	0.00294864	0.00278044	0.815261
FGB	1.15369	1.04804	1.26999	0.00648902	0.00303055	0.00352885	0.22195
LOC391124	0.427013	0.243859	0.747728	0.00299181	0.00303591	0.00291043	0.503869
CENTA2	0.705503	0.560387	0.888197	0.00408586	0.00303773	0.00298716	0.32781
SDCBP2	1.35552	1.10639	1.66074	0.00407329	0.00303931	0.00332729	0.554349
TCL1B	0.372367	0.19369	0.715871	0.00241355	0.00303994	0.00305377	0.52218
SP140	0.651671	0.490861	0.865163	0.00230854	0.00304468	0.0030593	0.374303
LMCD1	0.695924	0.546995	0.885403	0.00392361	0.00304905	0.00317133	0.338408
WWP1	0.363677	0.186495	0.709192	0.00309879	0.00305211	0.00299344	0.522696
GBF1	0.575691	0.399636	0.829306	0.00491984	0.00306187	0.00302732	0.42967
KCNA4	0.395231	0.212645	0.734593	0.00341727	0.00307792	0.00333273	0.521947
UCK2	1.43729	1.12854	1.83049	0.00318157	0.00308952	0.00328162	0.70195
PIM1	0.69153	0.542357	0.881731	0.00445155	0.00309943	0.00292747	0.339374
MMP7	0.844858	0.755377	0.944939	0.00385352	0.00311329	0.00316254	0.189562
C5orf5	0.513467	0.328833	0.801768	0.00407299	0.00315249	0.00337142	0.472935
TBX2	0.748624	0.618298	0.906421	0.00293825	0.00315601	0.00300936	0.288122
FLJ33790	1.32259	1.09713	1.59439	0.00374197	0.00315924	0.00336688	0.497257
PRKCH	0.644994	0.481022	0.864861	0.00431113	0.00316956	0.00338887	0.383839
HSPA4L	1.44383	1.1295	1.84563	0.00352928	0.00318798	0.00336737	0.716132
GZMM	0.690216	0.537639	0.886093	0.00184189	0.00318894	0.00362868	0.348454
C15orf42	1.4604	1.13425	1.88033	0.00422229	0.00319224	0.00331579	0.746083
LOC647082	0.374224	0.195079	0.717885	0.00274422	0.003197	0.00310492	0.522806
RRP22	0.526508	0.344322	0.805091	0.00213941	0.00321095	0.00307133	0.460769
DYSF	0.677239	0.522379	0.878006	0.00356368	0.00323601	0.00325982	0.355627
LOC644361	0.402669	0.218693	0.741416	0.00285873	0.0032362	0.00349376	0.522723
LRAT	1.55055	1.15523	2.08116	0.00582513	0.00323827	0.00349027	0.925938
TOR1AIP2	1.58156	1.16379	2.1493	0.00339716	0.00323899	0.0033983	0.985506
RBP2	0.592207	0.421759	0.831539	0.000920958	0.00325697	0.00248462	0.409781
FRZB	0.765682	0.64023	0.915717	0.00472262	0.00326243	0.00345152	0.275487
PRIM1	1.45693	1.13249	1.87432	0.00365398	0.00326306	0.00341163	0.741831
CFLAR	0.632004	0.465169	0.858674	0.00388247	0.00326704	0.0033429	0.393505
JUNB	0.680307	0.525417	0.880857	0.00424914	0.00327839	0.00347371	0.35544
LOC646769	0.495468	0.30954	0.793076	0.00249621	0.00328102	0.00343462	0.483536
OXCT1	1.39841	1.11813	1.74895	0.00484335	0.00329403	0.00329924	0.630819
ZNF311	1.4214	1.12173	1.80111	0.0038198	0.00330797	0.00360403	0.679383
C1orf172	1.42736	1.12464	1.81157	0.00224369	0.00330869	0.00343595	0.686934
CD97	0.66617	0.507894	0.87377	0.00535598	0.0033181	0.00333656	0.365877
NLRP3	0.744154	0.610166	0.907564	0.00495322	0.00332852	0.00352777	0.297398
PTPRO	0.699573	0.550843	0.888462	0.00333492	0.00336021	0.00339263	0.337619
TRPM1	0.37783	0.196072	0.728076	0.00342302	0.00336249	0.00363533	0.532003
METTL7A	0.688454	0.536556	0.883354	0.00339756	0.00340856	0.00333384	0.346798
CST11	0.221291	0.0800997	0.611358	0.00346408	0.00341	0.00362555	0.531259
FLJ40296	0.200647	0.0696142	0.578322	0.00159296	0.00341652	0.00294048	0.508708
LOC91353	0.713579	0.568472	0.895724	0.00306924	0.00341862	0.00362165	0.327252
LIMS1	0.369985	0.189926	0.720748	0.00301728	0.00342533	0.00347277	0.530822
LOC139735	0.364534	0.189586	0.700924	0.00114748	0.00343966	0.00248399	0.511338
LOC440053	0.222111	0.0815765	0.60475	0.00330143	0.00345109	0.00323897	0.523173
CA13	0.643358	0.478899	0.864293	0.00391568	0.0034539	0.00340881	0.385394
STK4	0.43014	0.24473	0.756021	0.0026639	0.00345745	0.0033681	0.511291
LOC644055	1.45269	1.12471	1.87631	0.012106	0.00346198	0.00423409	0.751592
EPAS1	0.706738	0.559297	0.893047	0.004063	0.00346637	0.00364331	0.33375
CLDN20	0.533803	0.350565	0.812819	0.00280689	0.00348154	0.0034336	0.462254
PIK3CB	1.47718	1.13422	1.92383	0.00264285	0.00348457	0.00379924	0.789606
RGS19	0.592029	0.416004	0.842536	0.00368582	0.00351847	0.00359506	0.426532
CCDC127	1.54811	1.15289	2.0788	0.00176987	0.00352507	0.00366072	0.925903
FCRLM1	0.816956	0.712642	0.936539	0.00373839	0.00353308	0.00372383	0.223897
OSBP2	1.46264	1.13366	1.8871	0.00431612	0.00354308	0.00344496	0.753439
AURKA	1.28179	1.0853	1.51384	0.00350937	0.00354569	0.00345402	0.428541
STGC3	0.474507	0.287811	0.78231	0.00385699	0.00357709	0.00347373	0.494499
C9orf28	0.673886	0.516076	0.879952	0.0041796	0.00357867	0.00373839	0.363876
LOC642233	0.637268	0.470193	0.863712	0.0034148	0.00358566	0.00367909	0.393519
HPCAL1	0.380902	0.198497	0.730923	0.00329132	0.00359745	0.00370143	0.532426
CYP2B7P1	0.801553	0.690125	0.930972	0.00270794	0.00360457	0.00377273	0.240847
LOC652577	0.488837	0.299902	0.796801	0.00213585	0.00361375	0.0040892	0.4969
CLEC7A	0.55559	0.373003	0.827554	0.00239192	0.00361706	0.00383963	0.454551
P2RY12	0.610093	0.437897	0.850001	0.00296757	0.00362584	0.0034951	0.412104
P2RY10	0.656582	0.493274	0.873956	0.00366182	0.00363698	0.00393543	0.380683
LOC652483	0.400116	0.215321	0.743507	0.00423115	0.00364068	0.00376211	0.528186
FLJ00312	0.270212	0.113844	0.641354	0.00142806	0.00364615	0.003006	0.52751
CHEK1	1.36637	1.1059	1.68817	0.00343629	0.0036526	0.00381765	0.582265
LOC646100	0.730658	0.591602	0.902399	0.00284107	0.00365356	0.00357495	0.310797
C1orf135	1.3583	1.10406	1.67108	0.00371126	0.0036576	0.00377759	0.567029
LOC643630	0.45833	0.270679	0.776074	0.00372982	0.00366204	0.00369137	0.505395
FOXF1	0.724178	0.581974	0.90113	0.00397369	0.00366697	0.0038119	0.319156
PRB2	1.26089	1.0716	1.48363	0.0139541	0.00367902	0.00521918	0.412026
COL13A1	0.659928	0.498712	0.87326	0.00337661	0.0036795	0.00363454	0.374548
SF1	0.484896	0.296694	0.792479	0.00365433	0.0036973	0.00387737	0.495785
MXRA8	0.715104	0.56961	0.897762	0.00360757	0.00369872	0.00386209	0.328152
C7	0.827482	0.727433	0.941291	0.00368679	0.00370269	0.00397465	0.213859
MGC29671	0.597246	0.42097	0.847336	0.00403029	0.00370397	0.00387395	0.426366
HIST1H4H	1.26438	1.07838	1.48247	0.00380544	0.00370467	0.00386002	0.404096
MPPED2	1.48039	1.12593	1.94645	0.0155983	0.00371001	0.0049641	0.820513
PHACTR2	0.728503	0.587449	0.903427	0.00787971	0.00372416	0.00391505	0.315978
ANKRD42	0.449198	0.262428	0.768895	0.00272745	0.00372485	0.00351979	0.506468
MSC	0.717402	0.572867	0.898403	0.0035129	0.00376782	0.00381224	0.325536
RENBP	0.700602	0.54993	0.892557	0.00348623	0.0037733	0.00397713	0.342627
RNASE3	0.55746	0.374262	0.830332	0.00183501	0.00377813	0.00404562	0.45607
MAPK12	1.49926	1.13824	1.97477	0.00501453	0.00380411	0.00396172	0.836531
CDH12	1.27778	1.07681	1.51627	0.0131101	0.00380866	0.0049928	0.439466
HSPC196	0.465248	0.277776	0.779245	0.00275334	0.00380889	0.0036393	0.501469
CA9	1.13579	1.04099	1.23921	0.00484342	0.00381842	0.0041898	0.198217
PRDM6	0.597934	0.421051	0.849125	0.00360865	0.00383102	0.00405407	0.428074
MGP	0.77266	0.648241	0.92096	0.00494157	0.00386135	0.00398806	0.272719
LOC652703	0.413077	0.226847	0.752193	0.00354922	0.00386784	0.00383817	0.525346
ADH1B	0.83277	0.734696	0.943936	0.00333021	0.00387177	0.00420357	0.20924
LOC652589	1.5546	1.15187	2.09814	0.0060757	0.00387304	0.00392436	0.946272
PRAM1	0.748346	0.614094	0.911947	0.00364848	0.00388246	0.00405732	0.297854
FBLN1	0.612749	0.438733	0.855786	0.00449327	0.00390174	0.0040574	0.417053
FLJ45300	0.433942	0.245452	0.767178	0.00389529	0.00390229	0.00408386	0.521725
LOC284293	1.45352	1.1258	1.87663	0.0064378	0.00391525	0.00411773	0.750823
LOC400451	1.40089	1.11267	1.76378	0.00303122	0.00393171	0.00412612	0.651114
IL18RAP	0.732379	0.592455	0.90535	0.00384607	0.00394206	0.00398756	0.312894
LOC122258	0.356037	0.175527	0.722183	0.00363416	0.00397048	0.00421044	0.546656
Rgr	0.692039	0.538513	0.889334	0.00375334	0.00397279	0.00402243	0.350821
SPARCL1	0.792228	0.675468	0.929171	0.0058912	0.00398151	0.00419654	0.253704
OLFML1	0.730347	0.590876	0.902738	0.00450723	0.00398677	0.00365677	0.311861
ARHGDIA	0.56737	0.385316	0.83544	0.00512394	0.00400907	0.00409604	0.450124
TUFT1	1.3832	1.10774	1.72716	0.00453757	0.00401292	0.00419658	0.619419
C20orf186	1.30594	1.08327	1.57439	0.0138559	0.00402561	0.00513373	0.491122
CD300C	0.678808	0.520527	0.885219	0.00369785	0.00402697	0.00423623	0.364691
LOC653598	0.544569	0.358879	0.826337	0.00285997	0.00405992	0.00428324	0.467458
LOC642622	0.411621	0.223205	0.759086	0.00251243	0.00407164	0.00447332	0.535881
HCA112	0.781452	0.660515	0.924532	0.0050301	0.00410004	0.0040444	0.264016
PRMT2	0.640804	0.472278	0.869466	0.00570101	0.00410222	0.00425831	0.397188
ALDH1A3	0.763143	0.633753	0.91895	0.00499348	0.00411872	0.00434927	0.285197
NEUROG2	1.45639	1.1217	1.89094	0.0144322	0.00412269	0.00477205	0.769235
ADPGK	0.510763	0.323112	0.807393	0.00428312	0.00413197	0.00403125	0.484281
ANKRD1	0.772902	0.64688	0.923475	0.00320607	0.0041523	0.00455957	0.276595
ISGF3G	0.551499	0.3672	0.8283	0.00524979	0.00417513	0.00413432	0.4611
CCL3	0.788042	0.669449	0.927645	0.00415181	0.00419164	0.00420268	0.258196
LCK	0.455189	0.265152	0.781426	0.00323648	0.0041949	0.00431091	0.516273
CCR10	1.54734	1.14747	2.08656	0.00906949	0.00419945	0.00421301	0.93909
DYRK2	0.500415	0.312046	0.802492	0.00432658	0.00422046	0.00406477	0.490446
LOC648859	0.466462	0.276906	0.785778	0.0027159	0.00422972	0.00415657	0.508872
CYP27A1	0.759384	0.628537	0.917471	0.003557	0.0042306	0.00433553	0.288934
CTSO	0.779492	0.656242	0.92589	0.00954468	0.00424098	0.00455659	0.269648
LOC402560	0.706627	0.556043	0.897991	0.00418942	0.00425986	0.00451287	0.341949
KRTAP19-7	1.5657	1.14902	2.13348	0.010238	0.00427081	0.00451357	0.984459
CSK	0.574596	0.392664	0.840821	0.0042342	0.00427179	0.00433718	0.448156
KLRD1	0.628461	0.455973	0.866199	0.0034643	0.00427754	0.00454764	0.410226
KCNA5	0.715259	0.567507	0.901478	0.00342585	0.00428746	0.00453264	0.333972
OR10H1	0.395413	0.209054	0.747899	0.00338222	0.00428941	0.00432703	0.538845
C10orf56	0.63355	0.462704	0.867477	0.00486943	0.00429118	0.00441827	0.404773
GPR84	0.776381	0.65191	0.924619	0.00329236	0.00429948	0.00452479	0.272709
VWF	0.65725	0.492435	0.877228	0.0041824	0.00430334	0.00438259	0.384793
MMP19	0.517286	0.329438	0.812249	0.00335877	0.00432106	0.00419317	0.482811
GNG11	0.769487	0.642362	0.921771	0.00429158	0.00432979	0.00445332	0.279409
PCOLCE	0.730228	0.588013	0.906839	0.0048371	0.00434175	0.0044438	0.318827
ALOX12P2	1.45096	1.12043	1.87899	0.00812554	0.00436701	0.00477058	0.758558
UNQ830	1.29655	1.08413	1.55059	0.00603416	0.0043748	0.00444362	0.46646
NRTN	1.42446	1.11428	1.82099	0.00591413	0.00440582	0.00474962	0.706711
RBPSUH	0.491907	0.301087	0.803663	0.00346343	0.0044105	0.0046162	0.502576
PLEKHH2	0.76278	0.632282	0.920212	0.00536967	0.00442165	0.00467621	0.28793
FLJ43692	1.3213	1.09079	1.60051	0.00251262	0.00443047	0.00439342	0.509716
TLR7	0.785273	0.66458	0.927885	0.00473664	0.00444088	0.00452483	0.263305
LOC654123	0.446909	0.256483	0.778717	0.00387498	0.00445	0.0044727	0.522234
CTSK	0.757125	0.624719	0.917594	0.00450868	0.00445753	0.00455641	0.292875
AP1S2	0.717832	0.571028	0.902376	0.00506122	0.00446579	0.00451223	0.331348
NGB	1.30162	1.0841	1.56279	0.00739025	0.0044869	0.00472185	0.47869
DPYSL3	0.689949	0.535045	0.889699	0.00747462	0.00451098	0.00422504	0.354654
CD1D	0.740139	0.600553	0.912169	0.00578981	0.00452196	0.00477082	0.311616
MGC7036	0.735148	0.59424	0.909468	0.00699438	0.00452747	0.00459645	0.315228
LOC644591	0.65588	0.489302	0.879166	0.00447336	0.00456545	0.00478101	0.389864
CDCA7L	1.32091	1.0877	1.60412	0.00356794	0.00457539	0.00498266	0.516417
ONECUT1	1.50573	1.13122	2.00424	0.00853406	0.00459746	0.00503246	0.873023
C8orf16	0.744452	0.606185	0.914259	0.00285269	0.00460731	0.00487662	0.308074
CENTD2	0.404944	0.217353	0.754438	0.00487682	0.00461676	0.00440562	0.537085
C5orf14	0.658145	0.492897	0.878795	0.00815682	0.00463105	0.00457073	0.385898
LOC651675	0.393616	0.205866	0.752596	0.00305304	0.00463151	0.00481069	0.54673
C12orf35	0.696765	0.54436	0.891839	0.00506825	0.00465883	0.00411921	0.347479
SPANXE	1.21326	1.05406	1.39649	0.0222505	0.00466073	0.0070674	0.342431
PLSCR3	0.598387	0.419047	0.854481	0.00677009	0.0046778	0.00472588	0.435434
CAMK2B	1.46039	1.11934	1.90534	0.00950857	0.00468181	0.00525783	0.786
HEG1	0.61367	0.436828	0.862104	0.00454948	0.00469002	0.00486994	0.425277
ESPNL	0.754245	0.619442	0.918383	0.00342019	0.00469778	0.00499319	0.298941
CARD11	0.708331	0.55677	0.90115	0.00422307	0.00470741	0.00499614	0.34438
ALOX5AP	0.813168	0.704057	0.939189	0.00567824	0.00471423	0.00490168	0.235132
LOC645254	0.346111	0.165245	0.724939	0.00355822	0.00473032	0.00491266	0.559694
IKZF3	0.636103	0.464826	0.870491	0.00219687	0.00477105	0.00470544	0.405666
MGC99813	1.47001	1.12527	1.92037	0.00659917	0.00479252	0.00472054	0.7951
PACS1	0.726752	0.582189	0.907212	0.00787138	0.00479681	0.0047949	0.325024
CRISPLD2	0.802242	0.687843	0.935666	0.0097418	0.00480631	0.00499902	0.247823
MSI2	1.54662	1.14058	2.09721	0.00648999	0.00481586	0.00500792	0.956629
WDR37	0.57109	0.388262	0.840008	0.00561155	0.00481679	0.00443383	0.451746
TCTEX1D1	0.589039	0.407494	0.851464	0.00416753	0.00482478	0.00487331	0.44397
SCGB1D2	1.55095	1.14729	2.09664	0.0117829	0.0048256	0.00432739	0.94935
LOC646470	0.436485	0.245396	0.776372	0.00286883	0.00482581	0.0047807	0.530976
LOC647156	0.474774	0.281799	0.7999	0.00415938	0.00482812	0.00512864	0.518102
ARRDC2	0.350717	0.16963	0.725123	0.00520378	0.00488153	0.00469498	0.555492
PCSK1	1.34603	1.09107	1.66058	0.0130722	0.00488381	0.00554657	0.569504
TDRD5	1.2724	1.07321	1.50856	0.0084938	0.00489423	0.00554862	0.435354
ZNF96	1.55857	1.14177	2.12754	0.00837783	0.00490952	0.00519072	0.985775
LOC647784	1.52873	1.1318	2.06486	0.0100756	0.00491616	0.00565484	0.933064
PCDH11Y	0.136212	0.033849	0.548132	0.00504393	0.00492664	0.00501083	0.514283
CARD12	0.638575	0.466955	0.873271	0.00431988	0.0049379	0.00497748	0.406316
SAMD3	0.623071	0.446985	0.868524	0.00403378	0.00498147	0.00524185	0.421539
OR9I1	0.526174	0.337125	0.821237	0.00217566	0.00498438	0.00469809	0.484112
SLC1A1	0.766712	0.635585	0.924892	0.00423569	0.0050093	0.00550599	0.289308
SYNPO2	0.325061	0.144186	0.732836	0.00076245	0.00501047	0.00674047	0.588649
C1orf45	0.515245	0.323919	0.819579	0.00519505	0.00501133	0.00510814	0.49566
HAS2	0.384392	0.197559	0.747914	0.00356669	0.00502456	0.00487377	0.550354
PREX1	0.727275	0.582089	0.908674	0.00550174	0.00504075	0.0050648	0.326586
LOC92691	1.44825	1.11619	1.87909	0.00725063	0.00505883	0.00531611	0.762897
CYBB	0.823046	0.717917	0.943571	0.00616695	0.00506211	0.00522201	0.225653
LOC388015	0.440019	0.247255	0.783068	0.00479091	0.00507511	0.00524688	0.535813
PTAFR	0.72417	0.57786	0.907524	0.00641598	0.00508071	0.00506878	0.329664
ZNF655	0.399217	0.210129	0.758458	0.00409151	0.00508075	0.00504291	0.548329
EBI3	0.75824	0.624577	0.920508	0.0051804	0.00508455	0.00515617	0.29593
RASIP1	0.695092	0.539552	0.895469	0.00542747	0.00510323	0.00488908	0.355917
AP1M2	1.54819	1.13855	2.10521	0.00499406	0.00511986	0.00531183	0.966652
PTPN3	1.4041	1.10716	1.78067	0.00559572	0.00513173	0.00511495	0.67351
ACCN1	0.381093	0.193877	0.749097	0.00348083	0.00516322	0.00514567	0.55522
PDE4B	0.60612	0.426018	0.862363	0.00698342	0.00516883	0.00538452	0.436345
HSPC105	1.36595	1.09562	1.70298	0.00733526	0.00518184	0.00557899	0.607362
OR4F21	0.320457	0.143908	0.713598	0.00512629	0.00518775	0.00533502	0.569689
LSP1	0.559271	0.371238	0.842542	0.00635201	0.00519282	0.00544569	0.471304
FMO1	0.781702	0.656868	0.930259	0.0047466	0.00519997	0.00553179	0.273391
RAB5B	0.383301	0.195321	0.752196	0.00525445	0.00520542	0.00530653	0.556875
LILRA5	0.651197	0.481104	0.881426	0.00379579	0.00521807	0.00548432	0.400322
DGAT2L4	0.371174	0.184797	0.745522	0.00449046	0.00522096	0.00534823	0.560725
SIX4	1.30437	1.08287	1.57118	0.00558316	0.00522298	0.00513578	0.488314
P2RY5	0.747196	0.608999	0.916753	0.00892228	0.00523283	0.005223	0.307754
NKX2-6	0.450258	0.256335	0.79089	0.00651997	0.00524048	0.00550035	0.534556
LOC645448	0.420562	0.228951	0.772535	0.0041672	0.00524856	0.00524169	0.543584
C1orf112	1.42308	1.11421	1.81756	0.00440619	0.00526736	0.00470928	0.703352
SLC2A6	0.706053	0.552323	0.902571	0.00495042	0.0052767	0.00546691	0.350248
TINF2	0.630766	0.455229	0.873992	0.00836704	0.00528653	0.0056165	0.418763
TNFAIP3	0.730393	0.585024	0.911883	0.00495444	0.00528923	0.00552682	0.326859
CIRBP	0.58977	0.406385	0.855909	0.00565525	0.00529813	0.0054563	0.449523
DIAPH3	1.54814	1.13671	2.10849	0.00767651	0.0053118	0.00555517	0.971783
CBX6	0.671858	0.507423	0.889579	0.00631858	0.00531548	0.00548721	0.382156
FAM63A	0.672762	0.50895	0.889299	0.00463258	0.00532216	0.00536902	0.380349
INSM1	1.32172	1.08283	1.6133	0.0146349	0.00537273	0.00609981	0.530467
ENPP2	0.818312	0.709875	0.943313	0.00735121	0.00538884	0.00569998	0.233438
ATPBD1C	0.336785	0.15674	0.723644	0.00525054	0.00539186	0.00528992	0.566904
SASH1	0.662368	0.495331	0.885734	0.00764868	0.00540109	0.00546354	0.390403
BCL6B	0.748081	0.608978	0.918957	0.00604564	0.00540651	0.00568988	0.309979
OR2D2	0.403509	0.212687	0.765534	0.00370661	0.00540769	0.00547433	0.552847
CENPF	1.26007	1.07001	1.48388	0.00712975	0.00544778	0.00558555	0.413869
GLIPR1	0.789711	0.668384	0.93306	0.00774142	0.00547742	0.00553587	0.264676
LOC649466	0.423849	0.230517	0.779327	0.00472577	0.00548025	0.00573954	0.54881
LOC440005	0.500841	0.30638	0.818727	0.00541922	0.00553446	0.005823	0.512347
RHOA	0.43151	0.237457	0.784146	0.00714192	0.00553463	0.00581813	0.546689
LHFPL1	0.534128	0.342391	0.833238	0.00560334	0.00553756	0.00570876	0.490848
LCP2	0.657815	0.488925	0.885045	0.00537661	0.00554119	0.00566417	0.39612
SDPR	0.791352	0.670423	0.934092	0.00622331	0.00555494	0.00567879	0.263669
IL3RA	0.616472	0.437514	0.868631	0.00450757	0.00558474	0.00569306	0.431117
LOC388199	0.432864	0.238345	0.786134	0.00501459	0.00558589	0.00595327	0.547789
SPARC	0.73007	0.583769	0.913037	0.00701779	0.00559955	0.00582789	0.329268
IL18BP	0.353261	0.168467	0.74076	0.00398914	0.00561074	0.00588273	0.572293
EIF2S2	1.4953	1.12434	1.98865	0.00570428	0.00562218	0.00568186	0.864303
PIK3C2B	0.644384	0.471884	0.879944	0.00644247	0.00565197	0.00570046	0.40806
CXCL6	0.833517	0.731629	0.949595	0.00353032	0.00565236	0.00619169	0.217965
GPR55	0.519228	0.325502	0.828254	0.00506327	0.00566216	0.00594405	0.502753
ABTB1	0.607331	0.426806	0.864213	0.00603062	0.00566856	0.00559128	0.437407
LOC392481	0.492709	0.302353	0.80291	0.00242422	0.0056801	0.00449708	0.500557
DNAJC5B	0.638143	0.460623	0.884076	0.00214907	0.00570238	0.00691782	0.423453
KLK10	1.54047	1.1311	2.09799	0.00862241	0.00570567	0.00611359	0.966889
RFC4	1.46034	1.11882	1.90611	0.00442544	0.00571291	0.00533662	0.787297
TIE1	0.67091	0.505263	0.890862	0.00520835	0.00572801	0.00580198	0.385599
PRG4	0.83869	0.739561	0.951106	0.00582225	0.00572975	0.00612357	0.211545
LOC647765	0.4736	0.27788	0.807171	0.00615926	0.00575597	0.00600615	0.529291
HNRPUL1	0.549737	0.360132	0.839166	0.0090657	0.00576173	0.00556292	0.479034
LOC645690	0.480707	0.285034	0.810706	0.00301997	0.00577541	0.00601594	0.525672
ORC1L	1.51317	1.12688	2.03187	0.00560489	0.00578215	0.00588245	0.904995
ELOVL2	1.55531	1.13603	2.12934	0.0111581	0.00578427	0.0058567	0.993316
MRAP	0.335368	0.153758	0.731484	0.00539141	0.00578826	0.00603615	0.577726
SOCS3	0.707313	0.553021	0.904651	0.0059576	0.00580312	0.00581399	0.35163
ROBO4	0.664061	0.495701	0.889603	0.00390744	0.00582661	0.00606814	0.393902
GCM1	0.626456	0.450013	0.872081	0.00265472	0.00584789	0.00558993	0.422069
FXYD2	1.32851	1.07984	1.63444	0.0185142	0.00585636	0.00722175	0.554598
LOC641825	0.685655	0.524836	0.895751	0.00619571	0.00586513	0.00565313	0.370915
ZXDB	1.35785	1.09337	1.6863	0.00811292	0.00586839	0.00564774	0.592934
ARHGEF4	1.51472	1.12636	2.03699	0.00846187	0.00587529	0.00601012	0.910633
SCOTIN	0.658768	0.48899	0.887493	0.01219	0.00587551	0.0060531	0.398503
NR1H3	0.675041	0.510427	0.892745	0.00515536	0.00587792	0.00586066	0.382318
NPAS1	1.43418	1.10991	1.85319	0.00884375	0.00588733	0.0058268	0.743281
VAMP5	0.774393	0.644943	0.929826	0.0073202	0.00588997	0.00615212	0.284883
HK3	0.793579	0.673118	0.935599	0.00704494	0.00589006	0.00591493	0.262481
SP110	0.54712	0.355823	0.841261	0.00592808	0.00590372	0.0060068	0.485438
PIM2	0.753297	0.615398	0.922096	0.00636778	0.00592138	0.00602942	0.306698
PLCD1	0.638599	0.463567	0.879718	0.0059629	0.00592399	0.00606786	0.416152
KIAA1344	1.41875	1.10548	1.8208	0.00686098	0.005945	0.00600065	0.715315
FKSG14	1.38479	1.09716	1.74782	0.00530773	0.0059531	0.00613436	0.650666
SEPN1	0.50356	0.310994	0.815361	0.00582511	0.00600333	0.00526885	0.504367
L2HGDH	1.4683	1.11452	1.93439	0.00732695	0.00600466	0.00631888	0.819878
MAP3K7IP1	0.356936	0.171333	0.743599	0.00349633	0.00600765	0.0059397	0.572266
SLC1A3	0.75662	0.61969	0.923806	0.00584029	0.00603987	0.00618101	0.304117
CASP4	0.450843	0.254263	0.799406	0.00681255	0.00606884	0.00640859	0.545143
PRDM1	0.567293	0.377692	0.852074	0.00547422	0.0061079	0.00630952	0.474381
RIPK4	1.37045	1.09374	1.71718	0.00756366	0.00611856	0.00617039	0.623441
MIST	0.709459	0.554187	0.908236	0.00466267	0.0061246	0.00645503	0.354048
FLJ46072	1.39178	1.09755	1.7649	0.00561351	0.00613793	0.00637025	0.667349
ZNF154	0.55833	0.368085	0.846904	0.00407834	0.00614041	0.00611289	0.478818
SSH2	0.50793	0.312184	0.826413	0.00808387	0.00615929	0.00637813	0.51423
HLA-DQB1	0.875768	0.795962	0.963577	0.00845778	0.00618227	0.0065077	0.167615
LOC652541	0.660214	0.490503	0.888645	0.00692126	0.0062008	0.00616825	0.398142
KIAA0040	0.580847	0.392762	0.859001	0.00643837	0.00620524	0.0065032	0.466239
C17orf53	1.46556	1.11439	1.9274	0.00641473	0.00622864	0.00624071	0.813014
LOC642563	0.468311	0.271163	0.808795	0.0049638	0.00623126	0.00650549	0.537632
CLEC11A	0.759509	0.622993	0.92594	0.00948294	0.00623413	0.00650621	0.302946
KLK8	1.39572	1.0952	1.7787	0.0115262	0.00624642	0.00703905	0.683508
AGER	0.791609	0.668381	0.937557	0.0053386	0.00626034	0.00679319	0.269176
SCTR	0.866806	0.781794	0.961062	0.00665179	0.00628654	0.00664612	0.179268
MYD88	0.703106	0.546358	0.904823	0.0111572	0.00628672	0.0061977	0.358465
MMP2	0.72644	0.578098	0.912847	0.00761163	0.00628827	0.00609873	0.334748
SNFT	0.704337	0.5472	0.906598	0.00599706	0.00630787	0.00650311	0.359398
ARID3B	0.536168	0.34341	0.837122	0.00741023	0.00630951	0.006105	0.493712
ENO2	1.36003	1.09026	1.69654	0.00607021	0.0063144	0.00640942	0.606282
C2orf15	1.30315	1.07679	1.57709	0.00690719	0.0063334	0.00652955	0.500301
KLHDC6	1.26907	1.06754	1.50864	0.00891818	0.00635405	0.00691797	0.441097
FAM89A	0.644383	0.469198	0.884976	0.00615088	0.00636147	0.00663074	0.415777
NRBP1	0.623695	0.444559	0.875014	0.00975848	0.00636723	0.00627865	0.430454
RAB40C	1.43938	1.10661	1.8722	0.00711341	0.00638784	0.00662378	0.765589
C9orf106	0.638498	0.462233	0.88198	0.0057602	0.00639489	0.00649086	0.419748
SCUBE3	0.688041	0.524547	0.902493	0.00459899	0.00639787	0.00691091	0.377946
PECAM1	0.790851	0.66787	0.936478	0.0101515	0.00641597	0.00650818	0.268608
MAPKAPK3	0.561231	0.37023	0.850769	0.00538902	0.00643663	0.00650085	0.480539
CD1B	0.737709	0.592034	0.919228	0.00494344	0.00643803	0.00672162	0.327194
CASQ2	0.734796	0.587814	0.918531	0.00502961	0.0064385	0.00680487	0.330717
PCSK5	0.724498	0.574127	0.914252	0.00565798	0.00644653	0.00662188	0.340125
KCNH1	0.27502	0.108228	0.69886	0.00618763	0.00645696	0.0066682	0.590633
LOC643420	0.374765	0.184873	0.759703	0.00394641	0.00646599	0.00648388	0.574829
NDST2	0.503381	0.307306	0.824559	0.00483449	0.00647287	0.00640874	0.517253
IL1B	0.807219	0.69155	0.942236	0.00614378	0.00648047	0.00664796	0.250686
PFN1	0.538662	0.344882	0.841322	0.00831889	0.00649391	0.00653901	0.49644
FLJ35880	0.766712	0.632338	0.929642	0.00666654	0.00654211	0.00689135	0.297304
HIST1H4L	0.410452	0.217214	0.775598	0.00389404	0.0065425	0.00609499	0.558384
LOC652271	0.420533	0.224466	0.78786	0.00647629	0.00655111	0.00684377	0.563393
B2M	0.629821	0.450677	0.880174	0.0103055	0.00655272	0.0067809	0.429497
PCDH19	1.27787	1.0689	1.52768	0.0133963	0.00656805	0.00711637	0.458781
WWC3	0.580382	0.391177	0.861101	0.00616767	0.00660056	0.00687418	0.469924
SMARCA3	1.47726	1.11418	1.95866	0.0071709	0.00660498	0.00670384	0.844482
TM7SF4	0.808433	0.692733	0.943458	0.00570704	0.00661106	0.0069642	0.250725
GUCY1A3	0.666464	0.497069	0.893587	0.00965503	0.00661648	0.00668926	0.396518
TBC1D2B	0.787629	0.660924	0.938624	0.0186424	0.00661843	0.00763518	0.2777
HAPLN3	0.728013	0.579261	0.914964	0.00562205	0.00662292	0.00648816	0.335703
IER2	0.646678	0.471868	0.886249	0.00751697	0.00670095	0.00670851	0.41438
LOC651868	0.472917	0.273943	0.81641	0.00608939	0.00675579	0.00718612	0.542466
CLIPR-59	0.698784	0.54099	0.902603	0.00758479	0.00675958	0.00605683	0.361613
CDC20	1.28155	1.07003	1.53489	0.00702203	0.00676673	0.00703082	0.464858
LAMA4	0.721995	0.569562	0.915223	0.00703365	0.00677044	0.00710015	0.345661
LOC390110	0.431476	0.234241	0.794787	0.0053157	0.00677612	0.00699876	0.560545
AP1M1	0.524194	0.327778	0.838308	0.00669068	0.00679121	0.00701364	0.51053
LOC145845	0.408384	0.213023	0.782906	0.00626123	0.00680973	0.00699604	0.569882
CES1	0.622956	0.442489	0.877027	0.00456901	0.00681121	0.00669136	0.434537
ARHGAP4	0.651603	0.478171	0.887938	0.00465864	0.0068246	0.00667366	0.409767
CMTM7	0.685286	0.52167	0.900217	0.00749531	0.00682767	0.00662348	0.378547
BSN	1.40255	1.09657	1.7939	0.0114317	0.00683879	0.00705623	0.697322
C1orf73	1.54321	1.12738	2.11241	0.0064074	0.00685067	0.00676023	0.985033
ZNF659	0.695202	0.534243	0.904655	0.00593976	0.00685273	0.00681592	0.370411
TPM4	0.630037	0.449946	0.882208	0.00708571	0.00685926	0.00715351	0.432263
LIN9	1.43559	1.10353	1.86755	0.00700469	0.00687645	0.00706018	0.76402
SOCS1	0.72816	0.578788	0.916082	0.00843561	0.00689112	0.00676434	0.337294
C20orf118	1.30939	1.07503	1.59484	0.0113705	0.00690055	0.00738334	0.519806
CD80	0.719618	0.566014	0.914906	0.00587361	0.00690677	0.00723264	0.348892
FNDC6	1.1775	1.04459	1.32732	0.0114336	0.00691057	0.00749934	0.282735
RHBDF2	0.530765	0.335174	0.840491	0.0074252	0.00691147	0.00691542	0.505317
CD1C	0.763409	0.62668	0.929968	0.00689116	0.00691275	0.00734014	0.303288
IL6ST	0.576672	0.386809	0.859728	0.00505823	0.00691758	0.00689758	0.472919
RAB33A	0.666834	0.496096	0.896333	0.00680494	0.00693921	0.00724852	0.400237
TM4SF18	0.730461	0.581032	0.918321	0.00653037	0.00694891	0.00715245	0.337289
LOC389787	0.676905	0.509165	0.899906	0.00711862	0.00695606	0.00723415	0.390741
USP27X	1.36382	1.08553	1.71347	0.0144869	0.0069695	0.00770461	0.627937
C20orf195	1.39144	1.09196	1.77304	0.010192	0.00697823	0.00755241	0.681076
LOC651113	0.489219	0.291121	0.822115	0.0040743	0.00698038	0.00694298	0.530995
PLEKHM2	0.539582	0.344547	0.845018	0.00636975	0.00699592	0.00702271	0.50047
LOC643109	1.35513	1.08671	1.68986	0.0116409	0.00699594	0.00696934	0.603145
LOC90379	0.509236	0.311042	0.833718	0.00690057	0.00701431	0.00729671	0.522676
PYCARD	0.6835	0.517358	0.902996	0.00767585	0.0070177	0.00740447	0.385638
RNF125	0.587445	0.398334	0.866339	0.0054804	0.00704488	0.00727854	0.468005
PTCRA	0.585786	0.395777	0.867017	0.00557035	0.00708269	0.00751205	0.471239
FLJ43582	0.445232	0.248523	0.797638	0.00492005	0.00710031	0.00652811	0.549115
STXBP2	0.692598	0.529691	0.905607	0.0111738	0.00710223	0.00726036	0.375915
AQP7	1.4315	1.09976	1.86332	0.0135128	0.00711986	0.00765513	0.76356
LOC388135	0.669566	0.500034	0.896575	0.00425891	0.00712439	0.00708385	0.396541
FLJ39155	0.521304	0.325056	0.836035	0.00759714	0.00713785	0.00687007	0.510979
PEBP1	0.589235	0.401146	0.865516	0.00886788	0.00714112	0.00701396	0.464371
C1orf90	0.537129	0.340775	0.84662	0.00648279	0.00715592	0.00742458	0.505844
LOC647306	0.473392	0.27359	0.81911	0.00829884	0.00721323	0.00751222	0.54552
FCN3	0.832618	0.727844	0.952475	0.0064119	0.00722754	0.00759477	0.22463
SORD	1.53246	1.11969	2.0974	0.00860793	0.00725831	0.00767605	0.977715
LOC649367	0.414195	0.216753	0.791488	0.00858494	0.00726623	0.00763714	0.574736
TMEM24	0.664313	0.491763	0.897406	0.00892429	0.00729469	0.00768996	0.405643
CAMTA2	0.566009	0.373253	0.858309	0.00812143	0.00730302	0.00737931	0.485055
LOC646433	0.52428	0.326728	0.841281	0.00909106	0.00730912	0.0074447	0.514553
LOC650005	0.538091	0.342364	0.845713	0.007135	0.00731556	0.0072235	0.503349
LOC645349	0.520286	0.321785	0.841237	0.00947055	0.00732571	0.00769525	0.519452
FLJ44048	1.52525	1.11546	2.08558	0.0175638	0.00732596	0.00818347	0.970121
ATM	0.608599	0.423054	0.875522	0.0147415	0.00736822	0.00744124	0.452468
LOC441459	0.522324	0.323388	0.843636	0.00839635	0.00737737	0.00792907	0.520248
ICAM2	0.671248	0.500573	0.900115	0.00711023	0.00738672	0.00774537	0.399542
KA21	0.525846	0.328261	0.84236	0.00642972	0.00738874	0.00750595	0.514099
UNQ5783	0.765547	0.629094	0.931596	0.00708766	0.00739256	0.00764427	0.302502
CD33	0.809378	0.692839	0.945519	0.00843397	0.00740437	0.00767115	0.252681
LOC650361	0.427292	0.230428	0.792346	0.00424518	0.00740687	0.00696096	0.561918
RBM5	0.555784	0.360929	0.855837	0.00608638	0.00742664	0.0076589	0.494908
PRAME	1.34826	1.08128	1.68116	0.00897862	0.00745216	0.0079535	0.599877
TNRC4	1.34545	1.08006	1.67604	0.0163759	0.00746625	0.00812031	0.595979
LRRN3	0.684258	0.517381	0.90496	0.00667612	0.00746715	0.00781149	0.387579
GPR98	1.1792	1.04447	1.33132	0.0112621	0.00747824	0.00774887	0.286846
APOB	1.34199	1.07829	1.67018	0.0226273	0.00747903	0.00840808	0.591895
LOC441763	0.718235	0.562903	0.916431	0.0073614	0.00748058	0.00777131	0.353529
FLJ20718	0.450246	0.250629	0.80885	0.00793127	0.0074869	0.00759144	0.558221
CTSL2	1.23453	1.05726	1.44153	0.00842152	0.00752041	0.00772082	0.384265
CFB	0.817508	0.705331	0.947525	0.00898038	0.00753041	0.00745618	0.242194
BTLA	0.664495	0.492468	0.896612	0.00620523	0.00755344	0.00749741	0.404144
GNLY	0.764804	0.627571	0.932046	0.00688439	0.00756592	0.00787439	0.304475
FOXC1	1.24104	1.05836	1.45525	0.00723033	0.00757651	0.00785569	0.396881
CXCL13	0.869229	0.783811	0.963957	0.0077986	0.00757906	0.00791879	0.180146
TM6SF1	0.738899	0.591667	0.922768	0.00757855	0.00759849	0.00760996	0.331101
GSTA3	0.440581	0.243079	0.798553	0.00450371	0.00761051	0.00690608	0.555474
SIGLECP3	0.480992	0.280439	0.824966	0.00627891	0.00761624	0.0078374	0.544527
GAS6	0.59949	0.412646	0.870937	0.00906446	0.00761861	0.0072504	0.458291
ARHGEF16	1.33483	1.07871	1.65176	0.00692253	0.0076562	0.00788369	0.573047
GPR18	0.720053	0.56477	0.918032	0.00630314	0.00766681	0.00804837	0.353262
FASTKD3	1.5185	1.11659	2.06508	0.00641615	0.00769036	0.0077445	0.948486
FAM107A	0.844377	0.744964	0.957056	0.00771539	0.00769118	0.00812663	0.212092
NEU4	1.40228	1.09645	1.79342	0.0141044	0.00769927	0.00707022	0.696971
DAPK1	0.726742	0.574375	0.919526	0.0116352	0.00770528	0.00784132	0.345151
FLJ32675	1.43686	1.10118	1.87487	0.00887919	0.00770867	0.00758769	0.773697
MAST1	1.40259	1.09083	1.80347	0.0129438	0.00771765	0.00834518	0.712639
EPB41L2	0.59329	0.404419	0.870365	0.0083129	0.00772355	0.00758405	0.465946
PHKA1	1.36421	1.08844	1.70985	0.00911359	0.00773235	0.0070296	0.621415
LOC112703	1.32028	1.07658	1.61916	0.00939609	0.00773325	0.00761523	0.54258
MYO9B	0.635235	0.454751	0.887351	0.00639337	0.00774505	0.00779596	0.4326
CREB3L4	1.31492	1.07371	1.61031	0.0107556	0.00775196	0.00810089	0.536593
EVI2A	0.655689	0.480061	0.89557	0.00669596	0.00776298	0.00797019	0.415509
C6orf199	1.40925	1.09572	1.8125	0.0125084	0.00776361	0.00754172	0.716777
LOC644733	0.555373	0.359281	0.858491	0.008296	0.00778017	0.00813089	0.499211
PKD1L3	0.481811	0.281694	0.824092	0.00801238	0.00778293	0.00766534	0.542398
FAM101B	0.742714	0.595977	0.925579	0.00980424	0.0078071	0.00808262	0.329602
MRM1	1.48109	1.1068	1.98194	0.00961659	0.00783122	0.00822434	0.875137
SH2D1A	0.727541	0.574917	0.920682	0.00781701	0.00784006	0.00809909	0.345765
OSR1	0.803457	0.683483	0.944491	0.00829492	0.00784939	0.0079995	0.261008
CCDC51	1.43459	1.10269	1.86638	0.00699462	0.00785253	0.0071855	0.763691
JOSD2	0.693356	0.528331	0.909927	0.00890904	0.00786757	0.00827667	0.381596
ZNF551	1.47657	1.1083	1.96719	0.0106099	0.00786922	0.00775669	0.858891
CACNA2D3	0.727031	0.573689	0.92136	0.00733056	0.00787629	0.00834836	0.34767
MGC34774	0.743104	0.595604	0.927132	0.00440214	0.00788088	0.00853433	0.331529
KL	0.704155	0.543422	0.91243	0.00775829	0.00791845	0.00797391	0.369008
AOAH	0.735482	0.585609	0.92371	0.0079529	0.00792678	0.00822907	0.338101
WBP2	0.47459	0.273921	0.822264	0.00883832	0.00793727	0.00786461	0.548343
KIF1C	0.674405	0.503721	0.902924	0.00892412	0.00794643	0.00814863	0.399203
LOC653093	0.438297	0.238592	0.805157	0.00603947	0.00796274	0.00785083	0.566565
EGLN2	0.393232	0.196622	0.78644	0.00811461	0.00796531	0.00830771	0.589818
BTK	0.75146	0.608456	0.928074	0.00786256	0.00796779	0.00797769	0.319619
PGM5	0.687114	0.520373	0.907283	0.00785502	0.0079678	0.0081434	0.386911
HTR3A	1.5106	1.11204	2.052	0.00945977	0.00798084	0.00830391	0.939962
CCDC48	0.624323	0.440328	0.885204	0.00542734	0.00798657	0.00818202	0.444876
ECGF1	0.678484	0.509019	0.90437	0.00810406	0.00799559	0.00815681	0.395351
PRKCD	0.467411	0.265777	0.822017	0.00918976	0.00800826	0.0082808	0.55624
C19orf21	1.38279	1.08669	1.75958	0.00999995	0.00801601	0.00838545	0.672896
CTPS	1.49517	1.1259	1.98554	0.00786779	0.00804356	0.00544666	0.859636
ITLN1	0.812664	0.697171	0.94729	0.00430094	0.00804473	0.00799357	0.250119
SOD3	0.794818	0.670191	0.94262	0.00800524	0.00805339	0.00831403	0.272429
LOC650799	0.639878	0.458917	0.892196	0.00764279	0.00805466	0.00847469	0.433279
CD84	0.676611	0.507439	0.902183	0.00843015	0.00806285	0.00778664	0.394743
DRP2	0.418492	0.219425	0.798156	0.00791554	0.00808207	0.00818462	0.578731
ZRANB1	0.714607	0.556125	0.918254	0.00628952	0.00810293	0.00862477	0.362129
OVCH2	0.423693	0.22968	0.781591	0.00393521	0.00812713	0.00598257	0.551911
SMOC1	1.37158	1.08235	1.73812	0.0136036	0.00812882	0.00892755	0.655773
PRKAR1B	1.33414	1.07756	1.65181	0.0105473	0.00813188	0.00815752	0.574246
LOC392982	0.47095	0.269821	0.822003	0.00748984	0.00813189	0.0080565	0.552183
A4GNT	0.5209	0.320537	0.846505	0.00662757	0.00816613	0.00847327	0.525968
LOC344988	0.422321	0.222768	0.800632	0.00599861	0.00817854	0.00825893	0.577865
FKBP4	1.37206	1.0842	1.73636	0.00913488	0.00818416	0.00846695	0.652155
C2	0.769859	0.633569	0.935468	0.00724748	0.00818769	0.00851301	0.301898
LOC651997	0.555075	0.358339	0.859822	0.00653603	0.00818952	0.00837964	0.501482
C10orf11	0.755463	0.613084	0.930908	0.0119197	0.00822115	0.00849058	0.317824
PLK4	1.42076	1.096	1.84176	0.0070591	0.00823875	0.00799658	0.745767
MGC33556	0.706175	0.546136	0.913111	0.00649234	0.00824999	0.00797347	0.366976
UBE2E2	0.661096	0.485495	0.90021	0.00997342	0.00825754	0.00860494	0.414715
FBLN2	0.710985	0.553139	0.913876	0.0115261	0.00826002	0.00774257	0.360737
LOC643233	0.573361	0.378672	0.868147	0.00832524	0.00826026	0.00858917	0.489475
SLC25A4	1.49227	1.10897	2.00805	0.00743166	0.00827372	0.00822081	0.899077
TNFRSF9	0.777048	0.643752	0.937946	0.00746936	0.00827581	0.00860973	0.294194
PPAP2A	0.613231	0.425885	0.882989	0.00659513	0.00828503	0.00856427	0.457104
EDNRB	0.508659	0.3075	0.841412	0.00921505	0.00828685	0.00847864	0.533912
LOC651603	0.332126	0.146125	0.754886	0.00746378	0.00828852	0.00850841	0.608761
CTDSP2	0.651658	0.474367	0.89521	0.0129506	0.00829611	0.00821201	0.420843
KIAA1862	1.46036	1.10265	1.9341	0.0124741	0.0083104	0.00825128	0.831455
P2RX1	0.708517	0.548386	0.915405	0.00658447	0.00833723	0.00838496	0.367019
RGS9	0.266356	0.0996652	0.711837	0.0051412	0.00835521	0.00834754	0.612171
RPS6KA4	0.69533	0.531445	0.909753	0.013164	0.00836695	0.00805753	0.378308
ABI1	0.482739	0.280838	0.829793	0.00732279	0.00838593	0.00841277	0.548955
C1QC	0.833973	0.728462	0.954767	0.0139947	0.0084001	0.00852177	0.226305
ST3GAL5	0.737331	0.587142	0.925938	0.00948369	0.00841673	0.00873892	0.338796
TAGLN3	1.42267	1.09313	1.85157	0.023475	0.00846746	0.0087337	0.75844
CCL18	0.847569	0.748839	0.959316	0.0078554	0.00851873	0.00886377	0.210478
PIK3CG	0.752402	0.608146	0.930877	0.00896312	0.00855128	0.00880552	0.32273
C1QTNF5	0.700457	0.537014	0.913646	0.0109164	0.00855973	0.00863597	0.376632
HSPB2	0.712777	0.553179	0.918421	0.00946559	0.0085667	0.008846	0.365242
LOC642662	0.487947	0.284997	0.835422	0.0072805	0.00856831	0.00891275	0.550425
TRAP1	1.52756	1.11364	2.09534	0.00795909	0.00857705	0.00860295	0.981708
XRCC3	1.42861	1.09416	1.86531	0.00981307	0.00860287	0.00876237	0.771154
SIGLEC7	0.48892	0.285744	0.836561	0.00537082	0.00866886	0.00902306	0.550816
ARRDC5	0.756142	0.613425	0.932064	0.0077856	0.00866945	0.00881408	0.31864
CTSC	0.69402	0.527886	0.91244	0.00732229	0.00869476	0.00888777	0.384553
SDHC	1.52913	1.11174	2.10323	0.0115144	0.00870152	0.00902149	0.991493
LOC440386	0.49787	0.295733	0.83817	0.00690695	0.00874613	0.00868462	0.542437
LOC146053	1.41595	1.09132	1.83716	0.0103346	0.0087533	0.00885348	0.745839
FANCE	1.43237	1.0939	1.87556	0.0110519	0.00879253	0.0089879	0.781658
FLJ36888	1.52088	1.11015	2.08355	0.00904325	0.00880152	0.00903858	0.973403
DEFB4	0.854865	0.758492	0.963484	0.00443527	0.00881633	0.0101838	0.204991
PDE3B	0.743826	0.595582	0.928968	0.00926431	0.00884493	0.00906261	0.333386
ADCY4	0.746595	0.600074	0.928891	0.00702787	0.00884831	0.00874864	0.328817
CLIP2	0.720373	0.563649	0.920673	0.00937725	0.00885459	0.00878655	0.357024
TPPP	1.33713	1.07375	1.66513	0.0125804	0.00886142	0.00943989	0.591379
LOC648374	0.45469	0.252032	0.820305	0.00669165	0.00888027	0.00884695	0.568272
XLKD1	0.794146	0.667352	0.94503	0.00835233	0.00890716	0.00940404	0.277679
ANKRD47	0.719415	0.561386	0.921927	0.00959891	0.00891624	0.00925949	0.360541
TTK	1.28052	1.06279	1.54286	0.00936804	0.0089629	0.00931287	0.480077
RAD51AP1	1.30361	1.06829	1.59078	0.00686652	0.00898887	0.00904681	0.522491
C1orf66	1.4589	1.0978	1.93877	0.00939024	0.00900709	0.00923968	0.840968
SAMD9L	0.765881	0.627088	0.935393	0.0124557	0.00902555	0.00893112	0.308305
SSX2IP	1.41554	1.09142	1.83591	0.0103524	0.00904137	0.00881034	0.744491
BIRC5	1.34349	1.0755	1.67824	0.00820339	0.00904259	0.00928928	0.60274
APOC2	0.762852	0.622073	0.93549	0.00872348	0.00904473	0.00930523	0.313417
PLCG2	0.791704	0.66417	0.943727	0.0182677	0.00908158	0.0091543	0.279557
SLC25A45	0.540027	0.339938	0.857891	0.00817923	0.00908929	0.0090802	0.517953
SEC22L1	0.573238	0.376974	0.871683	0.00747966	0.00909546	0.00926376	0.494709
LOC651483	0.548571	0.348964	0.862353	0.00653586	0.00910572	0.0092785	0.513389
LAG3	0.789344	0.660018	0.94401	0.00802546	0.00916038	0.00956743	0.283992
CA6	1.49019	1.10292	2.01346	0.0106268	0.00917697	0.00937837	0.910538
SOSTDC1	0.820949	0.7069	0.953399	0.00786318	0.00918217	0.00972923	0.246498
NT5M	1.43451	1.09171	1.88496	0.0101733	0.00918391	0.00960475	0.793249
CGNL1	0.684959	0.514423	0.91203	0.011756	0.00918423	0.00958882	0.397607
ZNF683	0.800742	0.676963	0.947153	0.00820576	0.00918985	0.00949543	0.27019
ENTPD6	1.51418	1.10718	2.07079	0.0114631	0.00924635	0.00939353	0.963612
C17orf49	0.5635	0.364764	0.870514	0.0101383	0.00924638	0.00974105	0.50575
KRT17	1.11675	1.02708	1.21426	0.0115	0.00926985	0.00972326	0.187184
NCOA4	0.52007	0.317222	0.852629	0.0113353	0.00927665	0.00954064	0.535407
SLC43A2	0.62659	0.440651	0.89099	0.009136	0.0092802	0.00925273	0.450339
PPM1F	0.664012	0.488637	0.902329	0.00854714	0.00929349	0.00887599	0.413692
MGC71993	0.609995	0.420147	0.885627	0.0129625	0.00929401	0.00936456	0.465479
CCL3L1	0.724967	0.569155	0.923435	0.00663096	0.00929977	0.00918302	0.354279
CLCN5	1.47234	1.10085	1.96921	0.0138072	0.00930861	0.00911781	0.868357
PTMS	0.682559	0.511411	0.910985	0.00894733	0.00933097	0.00951584	0.399574
UNQ9391	0.555789	0.356352	0.866844	0.00901304	0.00933271	0.00959509	0.510492
LOC647219	0.547425	0.34757	0.862199	0.00780346	0.00936626	0.00933079	0.514629
FIS	1.2684	1.05833	1.52018	0.0201242	0.00937181	0.0100655	0.461851
KIAA0888	0.214503	0.0676344	0.680296	0.00948292	0.00937315	0.00894573	0.612661
ADCY9	0.705091	0.542372	0.916628	0.0104698	0.00937703	0.00904728	0.374256
MXD4	0.679824	0.508794	0.908347	0.0101972	0.00939749	0.00905108	0.399553
COL6A2	0.727698	0.572138	0.925554	0.0117143	0.00942078	0.0095858	0.353416
LOC389816	1.37798	1.08036	1.75758	0.011418	0.00949523	0.0098068	0.677225
IFNA6	0.413098	0.211167	0.808127	0.0101595	0.00950526	0.0098172	0.59696
RAB7B	0.799355	0.674227	0.947706	0.00991343	0.0095205	0.00992756	0.273479
BIN1	0.644323	0.461811	0.898966	0.0127599	0.00953173	0.00968783	0.437155
PSMB9	0.764433	0.624236	0.936117	0.0123531	0.00953217	0.00936101	0.31188
ITPKB	0.680456	0.508739	0.910132	0.00961359	0.00955459	0.00947076	0.401392
PTPRB	0.768833	0.630064	0.938165	0.0100231	0.00957268	0.00964073	0.308101
IFNAR2	0.53465	0.331373	0.862624	0.0165897	0.00957527	0.0103047	0.531251
LOC649461	0.431367	0.22782	0.816776	0.00967809	0.00958399	0.00984228	0.588956
TRIP13	1.25644	1.05727	1.49314	0.00736676	0.00960324	0.00953254	0.43587
C1R	0.726933	0.570289	0.926604	0.012934	0.00960483	0.0100069	0.356314
GPR65	0.749064	0.601545	0.932759	0.00912184	0.00961304	0.0098226	0.331214
ALDH1A1	0.801874	0.678076	0.948275	0.0114438	0.00963787	0.0098595	0.270199
KLF12	0.621839	0.433061	0.892908	0.00704372	0.009657	0.0100652	0.459847
FGA	1.21734	1.04689	1.41554	0.0154977	0.00967322	0.0106078	0.36865
GJB7	1.40261	1.0837	1.81537	0.0145685	0.00967382	0.0101503	0.731677
RMI1	1.46177	1.10127	1.94029	0.00837266	0.00967605	0.00859892	0.839018
MGC42638	0.515058	0.310824	0.853487	0.0090747	0.00969216	0.0100308	0.542663
FLJ46831	0.444915	0.239913	0.82509	0.0102036	0.00969915	0.0101668	0.585177
LOC653670	0.416524	0.21404	0.81056	0.00959514	0.00970117	0.00992987	0.59652
LOC650667	1.45351	1.09288	1.93314	0.0094465	0.0097026	0.0101571	0.840253
UBD	0.861883	0.770159	0.964531	0.0114973	0.00971561	0.00962562	0.194372
CD320	1.43649	1.09815	1.87908	0.00804506	0.00973594	0.008212	0.780925
DPEP2	0.798772	0.67449	0.945953	0.00853633	0.0097437	0.00921727	0.271464
OTX1	1.31564	1.06799	1.62071	0.0138927	0.00978204	0.00993193	0.552717
LOC402055	1.35779	1.07536	1.71438	0.00719629	0.00978552	0.0101507	0.63902
PRB1	1.31931	1.06159	1.63959	0.0275821	0.00978959	0.0124561	0.578003
LOC400221	0.306176	0.124691	0.751809	0.00851709	0.00979699	0.00981229	0.627118
HIGD1B	0.828179	0.717077	0.956495	0.0095877	0.00979952	0.0103122	0.239418
BRF2	1.40952	1.08679	1.82808	0.013151	0.0098306	0.00967335	0.741294
APS	0.671424	0.495402	0.909987	0.0105422	0.00987997	0.0102274	0.414584
LOC650030	0.505357	0.30083	0.848939	0.00894706	0.00989015	0.00991575	0.548109
C14orf72	1.45226	1.09492	1.92623	0.00925856	0.00989105	0.0096199	0.831311
FAS	0.709489	0.545543	0.922704	0.00914333	0.00990578	0.0104667	0.377162
ID3	0.766505	0.625683	0.939023	0.0120628	0.00991225	0.0102458	0.31334
LOC645478	0.513135	0.30824	0.85423	0.00847143	0.00991872	0.010292	0.54599
RCSD1	0.573057	0.375516	0.874516	0.00790841	0.00992838	0.00983142	0.499001
TNFRSF18	0.727403	0.570126	0.928066	0.00940598	0.00993007	0.0104507	0.35794
LOC644782	0.494243	0.288669	0.846213	0.00846869	0.00993548	0.0102115	0.557544
LOC651586	0.543901	0.341703	0.865746	0.00893368	0.00993621	0.0102335	0.524043
B3GALT4	0.631207	0.444826	0.895681	0.0111704	0.00993849	0.00996624	0.450855
FMO2	0.769444	0.63014	0.939544	0.0109306	0.00997055	0.0101135	0.309404
WDR72	1.12292	1.02741	1.22731	0.0115808	0.0099758	0.0105837	0.199898
LOC648502	0.370623	0.173393	0.792196	0.00886072	0.009985	0.010437	0.618804
LOC283398	0.475603	0.270179	0.837217	0.00709892	0.00999616	0.0100021	0.567038
FAM89B	0.519518	0.315528	0.855387	0.00985452	0.00999748	0.0100555	0.539859
ASGR1	0.752226	0.606289	0.93329	0.0108167	0.0100111	0.00967179	0.327001
LOC649188	0.489302	0.283155	0.84553	0.0104221	0.0100524	0.0104311	0.562374
LOC441126	1.36382	1.07545	1.72952	0.0205778	0.0100869	0.0104649	0.654075
LRRC3	1.51655	1.10268	2.08576	0.00939729	0.01009	0.0104343	0.98308
SLAMF8	0.823327	0.71033	0.9543	0.0122997	0.0100963	0.00985117	0.24397
SETDB2	0.630605	0.443515	0.896618	0.00832741	0.0100998	0.0102384	0.453103
GTSE1	1.36372	1.07652	1.72755	0.00851145	0.0101023	0.0101377	0.651023
AGPAT5	1.45939	1.09426	1.94634	0.00773354	0.0101126	0.0100777	0.852078
LRFN4	1.29881	1.06347	1.58622	0.0120977	0.0101554	0.0103684	0.522748
IBRDC1	1.31328	1.06818	1.61463	0.0135989	0.0101612	0.00971776	0.546449
NXF1	0.538252	0.335689	0.863044	0.00874372	0.0101755	0.0101289	0.527354
IGSF2	0.498628	0.292299	0.850601	0.00822805	0.0101936	0.0106561	0.558302
CCKAR	0.425764	0.222147	0.816014	0.00697517	0.0102277	0.0100956	0.593867
LOC653217	0.426483	0.221745	0.820256	0.00997544	0.010249	0.0106578	0.598511
MYO5A	0.755898	0.611294	0.934709	0.0121824	0.0102563	0.00978793	0.323415
PAG1	0.724287	0.565905	0.926996	0.0139322	0.0102871	0.0104049	0.36109
MAF	0.640099	0.454748	0.900996	0.0104386	0.0103058	0.0105382	0.446247
SBEM	1.16315	1.03417	1.30821	0.0211178	0.0103225	0.0117274	0.274045
KIAA1794	1.35482	1.07293	1.71078	0.0090315	0.0103642	0.0107298	0.63785
CLDN5	0.78584	0.65316	0.945472	0.00941206	0.0103666	0.0106426	0.292312
IGFBP7	0.754917	0.607759	0.937707	0.0141527	0.0103783	0.0110428	0.329948
TFAP2A	1.49424	1.0974	2.0346	0.0104561	0.010382	0.0107693	0.937201
UBE2T	1.27928	1.06019	1.54366	0.00668777	0.0104043	0.0101776	0.483474
PAEP	1.1438	1.03088	1.26908	0.0166911	0.0104069	0.0112977	0.238208
ACSS2	0.454082	0.24792	0.83168	0.00937129	0.0104198	0.0105616	0.58376
DPRXP4	0.609807	0.41757	0.890544	0.00790731	0.0104312	0.0104691	0.472974
GPR146	0.585502	0.388206	0.883069	0.00924192	0.0104995	0.010678	0.494863
URB	0.696213	0.527963	0.918081	0.00966074	0.0105027	0.0103018	0.390118
ATF4	0.646578	0.462403	0.904109	0.0158724	0.0105176	0.0107944	0.441706
TIMP2	0.6611	0.481212	0.908236	0.0123584	0.0105222	0.0106509	0.427024
LOC643647	0.449981	0.243016	0.833209	0.00827072	0.0105438	0.0110705	0.590194
CLEC1B	0.509339	0.302799	0.856758	0.00792993	0.0105489	0.0110023	0.553959
LOC440577	1.37826	1.07754	1.76291	0.0201346	0.0105547	0.0106309	0.685373
PHF11	0.541615	0.33805	0.867762	0.0112941	0.0105712	0.0107804	0.529712
C19orf40	1.43954	1.09149	1.89858	0.0116706	0.0105788	0.00988376	0.807089
PHF1	0.574297	0.375018	0.879467	0.00876231	0.010583	0.0107521	0.504449
RELN	0.540469	0.336821	0.867249	0.00774745	0.0105833	0.0107634	0.530428
LOC441476	1.3154	1.06195	1.62933	0.0218455	0.0106018	0.0120609	0.567385
PCNX	0.535252	0.330803	0.866056	0.00923603	0.0106212	0.0109064	0.535252
LOC115749	1.17791	1.03785	1.33687	0.0126684	0.0106238	0.0112418	0.299026
RAD54L	1.45385	1.091	1.93739	0.00925492	0.0106309	0.010635	0.846394
TRIM17	1.29398	1.061	1.57811	0.0189134	0.0106932	0.0109412	0.517114
KIF22	1.49953	1.09731	2.04919	0.0124699	0.0106981	0.0109984	0.951886
SPN	0.353446	0.159364	0.783891	0.00842796	0.0107347	0.0104949	0.624527
RAP1A	0.588548	0.391149	0.885566	0.0115977	0.0107476	0.0109919	0.494416
ARID5B	0.77323	0.632736	0.94492	0.0247753	0.0107751	0.0119463	0.312184
C14orf58	0.751914	0.603427	0.936939	0.0149757	0.010776	0.0110764	0.333511
PSD4	0.591217	0.395009	0.884887	0.00947409	0.0108181	0.0106391	0.489878
PDZRN3	0.325461	0.13686	0.773963	0.00854801	0.0108324	0.0110952	0.637103
ITLN2	0.844379	0.740537	0.962782	0.0100284	0.0108343	0.011522	0.222245
LOC641741	0.41105	0.207244	0.815284	0.00842473	0.010854	0.0109453	0.60804
GADD45A	0.686164	0.513682	0.916562	0.0120657	0.0108627	0.0107787	0.40288
FMNL1	0.65	0.466447	0.905782	0.0114242	0.0108892	0.0109447	0.439335
TSPAN7	0.838331	0.731621	0.960604	0.0112643	0.0108911	0.0111308	0.228983
ANLN	1.28742	1.05952	1.56433	0.00905392	0.0108983	0.0110335	0.504807
SOX9	1.15182	1.03252	1.28492	0.011001	0.010905	0.0112918	0.252401
AHSA2	0.678118	0.502801	0.914567	0.0109463	0.0109514	0.0109243	0.411766
C4orf32	0.656565	0.474221	0.909024	0.0109884	0.0109529	0.0112585	0.434804
DKFZp434O0320	0.401211	0.197927	0.813281	0.010747	0.010976	0.0113008	0.615354
FRMPD2	0.21545	0.0659061	0.704317	0.00942097	0.0110045	0.0110861	0.638411
RBPMS	0.641549	0.455424	0.903741	0.0119465	0.0110141	0.0111206	0.448317
LOC51035	0.318408	0.131894	0.768674	0.0127193	0.0110463	0.0109266	0.636779
LRP1	0.73502	0.579319	0.93257	0.0122171	0.0110472	0.0112524	0.353251
C17orf76	0.562361	0.360022	0.878416	0.0116619	0.0110716	0.0114167	0.518394
ALS2CR15	1.48023	1.09307	2.00452	0.0127982	0.0110796	0.0112386	0.911454
RSC1A1	1.48854	1.0951	2.02333	0.00729446	0.011154	0.0110831	0.92823
CLDN7	1.3795	1.07591	1.76874	0.00870973	0.0111598	0.0111818	0.692824
FLJ33167	1.4675	1.09241	1.97139	0.0131385	0.0111689	0.0108704	0.878985
ZMYND17	0.412627	0.207947	0.818772	0.0108946	0.0111736	0.0113461	0.610825
LOC284194	0.622342	0.430713	0.899228	0.0097374	0.0111893	0.0115499	0.468516
OR8D4	0.398732	0.195325	0.81396	0.00917157	0.0111916	0.0115595	0.618635
IFI35	0.620126	0.428163	0.898155	0.0115444	0.0112197	0.0114614	0.469992
CPE	1.24487	1.05067	1.47497	0.0116232	0.0112235	0.0113682	0.424302
MGC50722	1.40287	1.07919	1.82362	0.0176299	0.0112737	0.0114257	0.744434
FLJ10260	0.68362	0.508694	0.918699	0.0142155	0.0112919	0.0116593	0.410005
CLDN14	0.245374	0.0826207	0.728734	0.00949513	0.0112992	0.0114145	0.646114
ANKRD33	0.705214	0.537552	0.925168	0.00973122	0.0113074	0.0116852	0.387616
CCL4L1	0.798192	0.670246	0.950563	0.0111829	0.0113322	0.0114466	0.280317
LOC647748	0.512076	0.304457	0.861279	0.00802157	0.0113341	0.0116392	0.556822
CXADR	1.47177	1.10731	1.9562	0.00384437	0.0113387	0.00776587	0.848893
FOSB	0.868493	0.778319	0.969114	0.011765	0.0113417	0.0117057	0.190795
SPC25	1.49944	1.09871	2.04633	0.0150172	0.0113751	0.0106709	0.947626
GIOT-1	0.414232	0.209131	0.820481	0.00960015	0.0113758	0.0114918	0.61135
FCGR2A	0.69632	0.526264	0.921329	0.0138857	0.0113794	0.0112928	0.395065
JPH4	0.49777	0.289265	0.856566	0.0107358	0.0114079	0.0117683	0.5673
C15orf38	0.607345	0.412645	0.893912	0.0164553	0.0114129	0.0114499	0.481266
PSPH	1.29827	1.06147	1.58789	0.0139593	0.0114383	0.0110678	0.526422
LOC646447	0.457418	0.248932	0.840518	0.00983818	0.0114514	0.0117474	0.591586
LOC648943	0.387438	0.187027	0.802601	0.00787535	0.0115031	0.0107187	0.615574
LOC643324	0.465522	0.257468	0.841698	0.00906352	0.0115184	0.0113976	0.58423
UNC84B	0.558462	0.355001	0.878534	0.010983	0.0115404	0.0117294	0.523533
SERPINB5	1.11481	1.02388	1.21382	0.0150688	0.0116037	0.0122945	0.189936
APOBEC3G	0.740982	0.587225	0.934997	0.0108216	0.0116135	0.0115241	0.347772
DEFB110	0.420326	0.214219	0.824737	0.0123097	0.0116163	0.0117264	0.610518
KIF20A	1.29101	1.05881	1.57412	0.0104476	0.0116523	0.0115752	0.515315
DNMT3A	0.421084	0.215006	0.824684	0.01299	0.0116691	0.0116684	0.609678
LOC653082	0.365242	0.166809	0.799729	0.0106564	0.0117124	0.0117734	0.63292
NFKBIA	0.622874	0.430023	0.902211	0.0104869	0.0117411	0.0122681	0.472188
MAPRE2	0.594746	0.39731	0.890296	0.0114399	0.0117488	0.0115858	0.492986
RPS6KA1	0.531815	0.324787	0.870808	0.00904423	0.0117786	0.0120807	0.546021
C20orf20	1.48214	1.09048	2.01448	0.0116206	0.0117977	0.011965	0.924002
HTN1	0.455758	0.250615	0.828821	0.00751511	0.0118028	0.0100159	0.578206
LOC650217	0.484523	0.275113	0.853331	0.010254	0.0118106	0.0121	0.578218
AXL	0.689254	0.515541	0.921502	0.0117293	0.0118321	0.0120143	0.405961
LOC643576	1.46667	1.08338	1.98556	0.0290777	0.0118329	0.0132064	0.902177
LOC651118	0.460285	0.251219	0.843335	0.0121879	0.0118406	0.0120222	0.592115
LOC649418	1.51985	1.10155	2.09699	0.0091014	0.01185	0.0108074	0.995441
PTPN6	0.381196	0.179718	0.808548	0.0117849	0.0118817	0.0119403	0.628831
PRKCB1	0.671297	0.492016	0.915903	0.0117134	0.0118988	0.0119333	0.423886
C1QB	0.815635	0.695637	0.956333	0.0149065	0.0119159	0.0120775	0.260695
THOC3	1.49824	1.09343	2.0529	0.0132278	0.0119168	0.0118763	0.959471
DPP4	0.817627	0.698742	0.956741	0.0126865	0.0119252	0.0120187	0.257999
CHI3L2	0.719195	0.556126	0.930079	0.010851	0.0119514	0.0119891	0.373953
APOA2	1.16819	1.02663	1.32925	0.0480703	0.0119618	0.0183339	0.302621
GHRH	0.461683	0.25234	0.844699	0.0120898	0.0119685	0.0121575	0.59236
LOC649864	0.682707	0.506947	0.919402	0.00924032	0.0120126	0.0119613	0.412454
FLII	0.519111	0.311452	0.865226	0.0123814	0.01202	0.0118914	0.553775
PLEKHC1	0.606817	0.410033	0.898043	0.0120229	0.0120328	0.0125018	0.48801
DSCR6	1.17188	1.03479	1.32714	0.0149871	0.0120421	0.0124644	0.292347
MRCL3	0.490872	0.281053	0.85733	0.0121021	0.0121016	0.0123844	0.576277
NINJ1	0.613203	0.418047	0.899463	0.0112923	0.0121057	0.0123479	0.481416
MT3	1.31813	1.06045	1.63843	0.0196413	0.012175	0.0128174	0.577982
LOC646332	0.698702	0.526772	0.926746	0.00942301	0.0122108	0.0128515	0.399973
SPON1	0.820309	0.702116	0.958398	0.0167209	0.0122708	0.0125861	0.256282
OR1J1	0.44912	0.23957	0.841961	0.0135942	0.012271	0.0125441	0.602391
SH3YL1	1.42824	1.07997	1.88882	0.0137575	0.0123019	0.0124394	0.80885
APOBEC2	1.49375	1.09375	2.04003	0.0251287	0.0123125	0.0116192	0.946277
SPATA13	0.748039	0.595979	0.938896	0.0130222	0.012327	0.0122881	0.342916
SIGLEC10	0.815468	0.695235	0.956495	0.0112454	0.0123723	0.0121933	0.261259
C20orf71	0.376414	0.174425	0.812312	0.0113326	0.012373	0.0127875	0.637887
CDCA7	1.51302	1.09697	2.08685	0.0114281	0.0123754	0.0115995	0.989883
OR8D1	0.47747	0.267411	0.852539	0.0107683	0.0124039	0.0124425	0.585128
LOC646537	0.470503	0.260355	0.850274	0.0102002	0.0124134	0.0125186	0.589919
OR4F5	0.431478	0.222453	0.836908	0.00903576	0.0124221	0.0128938	0.614454
C9orf40	1.4547	1.08268	1.95454	0.0121468	0.0124594	0.0128788	0.871864
KIAA1434	0.755622	0.607563	0.939762	0.0172417	0.0124971	0.0117916	0.332199
PLXNC1	0.727003	0.565519	0.934599	0.0123669	0.0125053	0.0128561	0.36908
TCF7L2	0.758219	0.610688	0.94139	0.0122321	0.012544	0.0121751	0.330703
MTMR7	1.19543	1.03624	1.37908	0.0288319	0.01255	0.0143597	0.342845
MLXIP	0.442477	0.232557	0.841884	0.00961103	0.0125524	0.0129775	0.609327
SAMSN1	0.675017	0.49585	0.918924	0.0114702	0.0125607	0.0125179	0.423075
CMAH	0.799248	0.67085	0.952221	0.0130425	0.0125872	0.0121455	0.281371
ACTA2	0.682055	0.504375	0.922327	0.0159507	0.0126001	0.0129524	0.417952
LOC653045	0.421728	0.213633	0.832525	0.0122256	0.0126156	0.0128397	0.618893
SLC6A4	0.725686	0.563233	0.934994	0.010847	0.0126159	0.0131455	0.371761
PPP2R5B	0.646118	0.458626	0.910257	0.0143346	0.0126425	0.0125018	0.451631
NTE	0.661189	0.47918	0.91233	0.0127555	0.0126492	0.011785	0.43315
LOC400759	0.764162	0.617579	0.945536	0.011388	0.0126799	0.0133102	0.327956
TIMM8A	1.5033	1.09003	2.07326	0.010685	0.0127156	0.0129341	0.983224
LOC440748	0.530969	0.322728	0.873579	0.0106784	0.0127223	0.0127023	0.550851
LOC642198	0.572954	0.369466	0.888514	0.0130552	0.0127223	0.012846	0.519047
DBNL	0.425022	0.216864	0.832983	0.0117619	0.012727	0.0126933	0.616119
ARHGAP5	1.37618	1.07193	1.76678	0.0199911	0.0127474	0.0122488	0.694842
RECQL4	1.25573	1.04981	1.50205	0.0144128	0.012767	0.0127078	0.452243
LRCH1	0.329013	0.13696	0.790373	0.0117244	0.0127967	0.0129163	0.653412
TIGD7	1.40299	1.07481	1.83138	0.00998532	0.0128515	0.0127509	0.756566
MEF2C	0.731569	0.570925	0.937414	0.0164929	0.0128651	0.0134781	0.366489
PLDN	0.423491	0.215824	0.830976	0.0126264	0.0128696	0.012478	0.615152
CRBN	0.50452	0.294098	0.865494	0.0143467	0.0128739	0.0129709	0.571396
MAGEF1	1.45984	1.08251	1.9687	0.0102928	0.0128995	0.0131534	0.886193
GRIN3A	0.543149	0.333922	0.883472	0.00723488	0.0129377	0.0139276	0.549551
CHRM3	1.28126	1.05234	1.55996	0.0162989	0.0129503	0.0135858	0.507619
DEFB126	1.4449	1.08142	1.93055	0.0212569	0.0129765	0.012796	0.849131
LOC440995	0.581057	0.377972	0.893259	0.0118885	0.0129893	0.0133446	0.515287
LOC645723	0.529192	0.321934	0.869881	0.0112784	0.0130263	0.0120836	0.547946
SELM	0.684132	0.506018	0.924941	0.0167341	0.0130405	0.0136231	0.418923
HERC1	0.70294	0.532019	0.928773	0.0220392	0.0130462	0.0131454	0.396753
NGFB	0.748707	0.595452	0.941405	0.0124966	0.0130499	0.0132602	0.345952
KMO	0.716165	0.54966	0.933109	0.0134858	0.0130969	0.0134069	0.383449
PBX2	0.619979	0.426129	0.902014	0.0105787	0.0131054	0.0124531	0.475885
LOC651686	0.448059	0.237413	0.845603	0.0123199	0.0131199	0.0132308	0.60819
AKAP7	0.467838	0.256393	0.853662	0.0148006	0.0131631	0.0133015	0.597269
LOC653301	0.416648	0.207954	0.834777	0.0120743	0.0131723	0.0135377	0.626823
FLJ39378	0.729492	0.567829	0.937182	0.0216299	0.0132135	0.0136052	0.369353
HIST2H2BE	1.28742	1.05398	1.57256	0.0125553	0.0132206	0.0133237	0.518584
INPP5A	0.315556	0.127015	0.783968	0.0118998	0.0132219	0.012986	0.656953
NPHS1	0.488392	0.27635	0.863132	0.0094189	0.0132244	0.0136417	0.586783
HIST2H2AA3	1.2857	1.05397	1.56837	0.0120001	0.0132322	0.0131975	0.514396
PDGFRA	0.813556	0.690778	0.958157	0.0171422	0.0132366	0.013434	0.267379
NOL3	1.46348	1.08145	1.98047	0.0130055	0.0132697	0.0136133	0.899015
LOC647062	0.462746	0.25062	0.854417	0.012936	0.0132864	0.0137848	0.603797
ING3	0.349245	0.151335	0.805974	0.0137118	0.0132955	0.013682	0.654639
LGALS3	0.717083	0.55086	0.933462	0.0148002	0.0133047	0.0134468	0.382602
PPM1E	1.30448	1.05495	1.61303	0.0209359	0.0133102	0.0141359	0.558077
MFSD7	0.711249	0.543189	0.931306	0.0121606	0.0133102	0.0132338	0.388117
LOC651213	0.546598	0.338095	0.883687	0.0132608	0.0133351	0.0137219	0.545592
HYLS1	1.49578	1.08968	2.05322	0.0106788	0.0133393	0.0127243	0.96354
FLJ36070	1.34747	1.06332	1.70755	0.0154449	0.0133483	0.0135853	0.64423
GALGT	1.34029	1.06347	1.68916	0.0180836	0.0133509	0.0130892	0.625683
HIST1H4A	0.522144	0.311856	0.87423	0.0123893	0.0133745	0.0134697	0.562374
C1orf186	0.772345	0.62876	0.948719	0.0137096	0.0133762	0.0138319	0.319959
FBLN5	0.772939	0.63025	0.947933	0.0140088	0.0133767	0.0133802	0.317683
SLC25A10	1.34962	1.06411	1.71173	0.0137082	0.0133788	0.0134217	0.647622
MS4A4A	0.667286	0.48345	0.921026	0.0101127	0.0133803	0.0138825	0.437576
MESP1	1.25127	1.04731	1.49495	0.0141024	0.0134209	0.0135429	0.447639
C14orf85	0.669436	0.486108	0.921903	0.0127325	0.013447	0.0139712	0.435795
DMXL2	0.685926	0.509666	0.923143	0.0131518	0.0134483	0.0128578	0.413477
LOC649853	0.871689	0.780906	0.973025	0.0161018	0.0134911	0.0143931	0.192119
LOC648754	0.445362	0.233856	0.848163	0.0136001	0.0134948	0.0138543	0.614308
LOC647958	0.480335	0.267606	0.86217	0.0142673	0.0135318	0.0140157	0.594564
LOC649578	0.471323	0.258751	0.858529	0.0140815	0.0135379	0.0139518	0.599778
LOC644802	0.379678	0.175417	0.821789	0.0105375	0.0135641	0.0139651	0.646372
TAS2R60	0.494471	0.2821	0.866719	0.014581	0.0136617	0.013913	0.584619
PTPRR	1.47131	1.08093	2.00268	0.0185775	0.0136661	0.0141026	0.921754
LOC645585	0.462244	0.249613	0.856003	0.0126455	0.0136739	0.0141071	0.606389
OR5F1	0.345315	0.148297	0.804078	0.00872074	0.0136865	0.0136782	0.655781
LOC646067	1.44723	1.07979	1.93971	0.0214277	0.0136898	0.0133722	0.859918
MOBKL2A	0.700732	0.5279	0.930149	0.0115651	0.0137026	0.0138524	0.402249
SLC34A2	0.853851	0.752428	0.968946	0.0160111	0.0137101	0.0143286	0.216519
HSPB7	0.730464	0.568363	0.938798	0.0117759	0.0137136	0.0141561	0.370435
LOC648554	0.330316	0.137206	0.795217	0.0127085	0.0137229	0.0134681	0.658011
GNGT1	1.17553	1.03359	1.33697	0.0168914	0.0137386	0.0137717	0.303383
GATA2	0.722115	0.556971	0.936225	0.0148284	0.0138026	0.013996	0.379254
MARVELD3	1.36088	1.06424	1.7402	0.0140179	0.0138877	0.0140386	0.675957
EBP	1.40554	1.09086	1.81098	0.00993439	0.0139128	0.00847523	0.720112
KRTCAP3	1.31114	1.05617	1.62765	0.0129507	0.0139238	0.0140777	0.571484
AK3L2	1.21856	1.0397	1.4282	0.016534	0.0139343	0.0146633	0.388509
FLJ11259	0.756253	0.605118	0.945135	0.013885	0.0140078	0.0140485	0.340016
SPAG7	0.602638	0.402185	0.902999	0.0138015	0.0140343	0.014109	0.500814
NRGN	0.828854	0.713259	0.963183	0.0140061	0.0140353	0.0143071	0.249924
FAM65A	0.721506	0.556413	0.935584	0.0161587	0.0140552	0.0138078	0.379171
PRSS16	1.32078	1.05665	1.65092	0.0131546	0.0140731	0.0145236	0.594267
RECK	0.702717	0.529521	0.932562	0.0152437	0.0140757	0.0145439	0.403041
CDH23	0.539039	0.328283	0.885098	0.0140683	0.0140767	0.0145914	0.556815
TAF4B	0.609809	0.410196	0.906559	0.0134871	0.0141033	0.0144903	0.496362
CG018	0.66529	0.479929	0.922243	0.0206823	0.0141213	0.014455	0.442315
GPR162	0.591346	0.388738	0.899552	0.0125161	0.0141346	0.014106	0.510814
LOC338588	1.39014	1.06881	1.80807	0.0250252	0.0141394	0.0140436	0.739259
TREM2	0.792266	0.657475	0.954692	0.0140899	0.0141416	0.0143945	0.297217
TUBB2C	1.48534	1.08088	2.04116	0.0133873	0.014144	0.0147064	0.960274
LOC158730	0.488091	0.274865	0.866727	0.0150288	0.0141495	0.0143586	0.591862
TMEM118	1.25978	1.04608	1.51714	0.018385	0.014209	0.0148954	0.471067
FXYD6	0.775003	0.632623	0.949428	0.015102	0.014212	0.0138537	0.316805
AJAP1	0.493283	0.280605	0.867155	0.0112364	0.0142129	0.0140815	0.586551
STON1	0.756522	0.604443	0.946863	0.0135362	0.0142388	0.0148175	0.34242
MGC2408	1.29869	1.05347	1.601	0.0118422	0.0142567	0.0143708	0.547522
OSTbeta	1.49113	1.08277	2.0535	0.0219689	0.0142875	0.0144047	0.970727
SERPINF1	0.785286	0.647128	0.95294	0.015898	0.0142939	0.0143571	0.305812
LOC650805	0.403812	0.194741	0.837338	0.0132558	0.0143005	0.0148065	0.642597
LPL	0.833423	0.719994	0.964721	0.0139564	0.0143093	0.0146413	0.244728
SIGLEC9	0.71716	0.548868	0.937055	0.0134024	0.0143417	0.0148335	0.388187
TPSAB1	0.853212	0.750887	0.96948	0.0178613	0.0144036	0.0148717	0.218593
LOC343927	0.371188	0.167443	0.822851	0.0137514	0.0144092	0.0146866	0.655408
FGF7	0.602056	0.400397	0.90528	0.0113388	0.0144143	0.0147638	0.504883
CD63	0.785573	0.646855	0.954039	0.0253049	0.0144387	0.0149081	0.307183
NEUROG3	0.471013	0.257504	0.861554	0.0116669	0.0144658	0.0145398	0.60405
RG9MTD2	1.44997	1.07808	1.95016	0.0200577	0.0144725	0.0140042	0.872078
ANKAR	0.547525	0.336813	0.890058	0.0128005	0.0144917	0.015108	0.553245
SNTG1	0.348828	0.150975	0.805967	0.0136196	0.0145319	0.0137086	0.654991
OVOL2	1.32628	1.05641	1.66509	0.0105026	0.0145386	0.0149847	0.608674
DUSP3	0.586541	0.382629	0.899123	0.013992	0.0145811	0.0143712	0.516494
C20orf166	0.368753	0.166807	0.815185	0.011393	0.0146118	0.0137081	0.648378
Gcom1	0.340984	0.143309	0.811323	0.0125486	0.0146195	0.0149856	0.668014
EDG1	0.772042	0.626946	0.950719	0.0176742	0.0146501	0.0148608	0.323774
CTSZ	0.80198	0.672691	0.956117	0.0208295	0.0146682	0.0138828	0.283425
TMTC4	1.41001	1.06878	1.86018	0.0157291	0.0146857	0.015077	0.791398
DRAP1	0.64225	0.449172	0.918322	0.0163021	0.0147388	0.0152238	0.46915
TMCO3	1.4006	1.0687	1.83559	0.0137191	0.0147682	0.0146295	0.766891
SCAMP2	0.745549	0.589877	0.942304	0.0213706	0.0148241	0.0139992	0.352427
TIAL1	0.566222	0.358494	0.894318	0.0190881	0.0148263	0.0147316	0.535825
MSR1	0.730736	0.567694	0.940605	0.0150509	0.0148473	0.0148788	0.372911
GMPS	1.4625	1.0763	1.98727	0.0155897	0.0148535	0.0151	0.91097
CBL	0.728407	0.565019	0.939041	0.0221749	0.0148543	0.0144735	0.374022
SRrp35	1.42095	1.06876	1.8892	0.0188643	0.0148866	0.0156241	0.820433
LOC653907	0.708482	0.536403	0.935763	0.0117653	0.0149024	0.0151969	0.399359
LOC116412	0.346529	0.1474	0.814672	0.0126461	0.0149139	0.0151019	0.667273
OR2F2	0.478802	0.267607	0.856675	0.0084296	0.0149606	0.0130966	0.589068
LOC650681	1.31538	1.05102	1.64623	0.033437	0.0149614	0.0166371	0.595211
SLC9A3R2	0.754725	0.601274	0.947337	0.0144183	0.0149685	0.015247	0.346063
STAB1	0.766993	0.619089	0.950231	0.0172604	0.0149986	0.0152236	0.331143
GYPE	0.411171	0.200802	0.841932	0.0124041	0.0150302	0.0150784	0.641131
UBE2B	0.634894	0.440184	0.915731	0.0155143	0.0150665	0.0150552	0.475547
POU1F1	0.355986	0.154443	0.820534	0.0145338	0.0150679	0.0153415	0.666091
RIT2	0.506325	0.29189	0.878291	0.0149939	0.0150683	0.0154454	0.5864
SRGN	0.813396	0.688015	0.961626	0.017683	0.0151219	0.0156022	0.273611
ROR2	0.767477	0.620429	0.949378	0.0167533	0.0151284	0.0147419	0.328949
VAMP2	0.725749	0.5607	0.939384	0.0213989	0.0151634	0.0148932	0.378684
ANXA5	0.557764	0.348299	0.8932	0.0176246	0.0152555	0.0150954	0.544901
ZNF117	0.471329	0.256377	0.866501	0.0142089	0.0152662	0.0154696	0.610124
MEI1	0.764901	0.615467	0.950618	0.014189	0.0152903	0.0156661	0.335152
NOTUM	1.39548	1.06488	1.82872	0.0229664	0.0152945	0.0157056	0.763836
SLC22A14	0.576724	0.368348	0.90298	0.00888679	0.0153165	0.0161234	0.534632
LOC646515	0.523798	0.309826	0.885541	0.0128802	0.015379	0.0157921	0.575715
FLJ10847	0.844007	0.736153	0.967662	0.0147083	0.0154195	0.0150487	0.231509
C9orf125	1.25004	1.04197	1.49965	0.0199071	0.0154492	0.0162796	0.457678
SPIB	0.769109	0.621208	0.952223	0.0105954	0.0154711	0.0159854	0.331015
LOC647374	0.404419	0.193515	0.845179	0.0145111	0.0154799	0.0160739	0.651664
MYCBPAP	0.591502	0.386409	0.905452	0.014546	0.0155022	0.0156416	0.519043
LOC286334	0.670987	0.485937	0.926506	0.0165242	0.0155123	0.0153661	0.44057
KLF13	0.61841	0.419031	0.912654	0.0175684	0.015521	0.0155108	0.493623
FLJ45910	1.49621	1.08045	2.07195	0.0259782	0.0155318	0.0152735	0.991491
TMEM150	0.668376	0.481841	0.927124	0.0159535	0.0155524	0.0158142	0.445282
LOC644710	0.528968	0.31573	0.886224	0.0132125	0.0155634	0.0155754	0.570494
S100A4	0.737203	0.575902	0.943681	0.0147852	0.0155879	0.0155171	0.367779
KLHL5	0.589538	0.383723	0.905746	0.0165741	0.015602	0.0158737	0.522023
FLJ12571	1.46823	1.07605	2.00335	0.0147174	0.0156791	0.0154264	0.927308
MASS1	1.15208	1.02705	1.29234	0.0177788	0.0156848	0.0157203	0.265286
C21orf124	1.32355	1.05399	1.66205	0.0178071	0.0157108	0.0158414	0.608057
CD22	0.664708	0.475877	0.928469	0.010029	0.0157677	0.0166093	0.452591
DPY19L4	1.46075	1.07215	1.99019	0.0125937	0.0158363	0.0163302	0.918043
ANGPT1	0.78391	0.642383	0.956617	0.0153357	0.0158494	0.0165503	0.314235
GBP1	0.833326	0.718795	0.966106	0.0182826	0.0158953	0.0156459	0.247311
HBEGF	0.814338	0.689638	0.961586	0.0196061	0.015911	0.0154405	0.271948
SIRPG	0.654588	0.462805	0.925844	0.0138745	0.015916	0.0165959	0.463039
ADAMTS1	0.808195	0.679614	0.961103	0.0167841	0.0159558	0.0160088	0.28149
MIPOL1	1.45627	1.07191	1.97845	0.0205712	0.0159593	0.0162105	0.90654
ZNF266	0.546668	0.334893	0.892364	0.0151174	0.0159673	0.0157158	0.557472
TSGA10	1.4848	1.07401	2.05272	0.0217764	0.0160284	0.016756	0.978708
FLJ35773	1.20535	1.03435	1.40462	0.0183493	0.0160437	0.0167301	0.37027
NSD1	0.538817	0.325081	0.893082	0.0134349	0.0160487	0.0164594	0.568001
EGR1	0.799712	0.666925	0.958937	0.0226926	0.0161193	0.0158408	0.292013
LOC642062	0.564274	0.353336	0.90114	0.0125337	0.016145	0.0165843	0.547804
CORO1C	0.653452	0.461519	0.925205	0.0184273	0.0161456	0.0164796	0.463687
HIST1H1E	0.689698	0.508493	0.935477	0.0111351	0.0161557	0.0169011	0.426984
ATP8B4	0.702011	0.526473	0.936076	0.0172971	0.0161671	0.0159563	0.409603
OPHN1	1.43914	1.06826	1.93879	0.0192307	0.0161967	0.0166545	0.870526
ZFYVE26	0.636983	0.44465	0.91251	0.0145	0.0162044	0.0139253	0.467859
FABP4	0.849786	0.744048	0.970551	0.0124933	0.016253	0.0163565	0.226503
LOC650296	1.35635	1.05767	1.73938	0.0261664	0.0162551	0.0163145	0.681706
PRSS21	0.701186	0.525003	0.936493	0.0117955	0.0162729	0.0162001	0.411491
LOC642995	0.37272	0.165999	0.836874	0.0159293	0.0163193	0.0167803	0.670875
LOC653354	1.43584	1.0683	1.92984	0.0148894	0.0163289	0.0164897	0.861545
TMEM130	0.800797	0.666867	0.961623	0.0119338	0.0163392	0.0173575	0.294756
RSU1	0.592097	0.385328	0.909818	0.0169057	0.0163568	0.0167944	0.524489
TNFRSF10D	1.46994	1.07209	2.01543	0.0158217	0.0163575	0.016745	0.943339
GMDS	1.35859	1.05906	1.74284	0.0163735	0.0163788	0.0158859	0.683781
LOC645333	0.414441	0.201442	0.852656	0.0155397	0.0163961	0.0167105	0.651214
RARRES1	0.74408	0.585502	0.945607	0.0123467	0.0164056	0.0156354	0.360105
LOC400696	0.527747	0.313443	0.888573	0.0149617	0.0164286	0.0161994	0.57513
USF2	0.550425	0.337351	0.898081	0.0166555	0.0164607	0.0168339	0.56073
ITGA8	0.837842	0.724603	0.968778	0.0146707	0.0164725	0.0169352	0.244175
LOC650543	0.474019	0.25697	0.8744	0.0181845	0.0164743	0.0168667	0.61743
LOC613266	1.4795	1.07429	2.03756	0.0257308	0.0164853	0.0164486	0.963267
MYO7A	0.687852	0.508305	0.93082	0.0139833	0.0164953	0.0153309	0.422515
PIK3R1	0.337596	0.138655	0.821979	0.014928	0.0164966	0.0167681	0.683324
SLC8A2	1.4213	1.06504	1.89673	0.0209777	0.0165485	0.0169437	0.831696
HERC4	0.482416	0.265057	0.878021	0.0182269	0.0166024	0.0170463	0.612964
LOC652671	0.548205	0.335796	0.894973	0.0158575	0.016636	0.0162313	0.559177
FLJ36131	0.564094	0.352775	0.901996	0.0140153	0.0166521	0.0168185	0.549221
PTTG1	1.28923	1.0473	1.58705	0.0160699	0.0166826	0.0165832	0.539745
MGAT1	0.579293	0.371056	0.904392	0.0144473	0.0167001	0.0163004	0.533337
FAM55C	0.698469	0.520046	0.938109	0.0136322	0.0167051	0.0171034	0.418063
FASLG	0.741315	0.579319	0.94861	0.0145658	0.0167108	0.0173442	0.36929
LOC641926	0.575575	0.365426	0.906578	0.018146	0.0167302	0.0171678	0.541152
LOC641953	0.480715	0.263111	0.878289	0.0138223	0.0167702	0.0172187	0.615178
LOC648790	0.476447	0.259232	0.87567	0.0178101	0.0167767	0.0169631	0.616438
SNAG1	0.496106	0.279005	0.882139	0.0186383	0.0167883	0.016986	0.603134
MLSTD1	0.677995	0.493219	0.931992	0.0153217	0.0167938	0.0166747	0.438773
TGFB1I1	0.629286	0.430067	0.920789	0.0182179	0.0167963	0.0170844	0.490722
C20orf179	0.398761	0.187013	0.85026	0.0162465	0.0167989	0.0173196	0.663247
BMF	0.610472	0.407067	0.915515	0.0185145	0.0168127	0.0169928	0.508448
SGIP1	0.728546	0.561839	0.944718	0.0171493	0.0168262	0.0168976	0.38288
ALDH2	0.693219	0.513094	0.936578	0.0187266	0.0168272	0.0169969	0.423484
SPTAN1	0.561835	0.350227	0.901296	0.0152451	0.016843	0.0168062	0.551069
JAKMIP2	1.40528	1.06197	1.85959	0.0222082	0.0168529	0.017283	0.797627
TROAP	1.25274	1.0409	1.50769	0.0184358	0.016873	0.0171227	0.466795
CCL14	0.856469	0.753706	0.973244	0.0192882	0.0168953	0.0175096	0.219539
LOC647718	0.499251	0.281615	0.88508	0.0126898	0.0169097	0.017414	0.603465
LOC619383	0.813486	0.686652	0.963748	0.0143774	0.016986	0.0169895	0.277097
RFC3	1.46227	1.07162	1.99533	0.0168177	0.0169933	0.0165698	0.923713
LOC391045	0.639712	0.442728	0.92434	0.0163529	0.0170031	0.0173635	0.481612
GTPBP5	1.35792	1.05539	1.74718	0.0198605	0.0170434	0.0173505	0.691789
SLC35C1	0.739948	0.577325	0.948378	0.0244785	0.0170521	0.017381	0.371054
DCI	1.39497	1.06736	1.82314	0.0123694	0.0170586	0.0147975	0.755776
TMSL8	1.22517	1.03658	1.44808	0.0223525	0.0170663	0.0172532	0.411493
OR6C70	0.428461	0.213136	0.861324	0.0182859	0.0171042	0.0173602	0.648188
TAF7L	1.39898	1.06095	1.8447	0.0270006	0.0171277	0.017348	0.783744
LOC130940	1.43956	1.06568	1.94461	0.0228397	0.0171346	0.0175709	0.878929
CD209	0.800182	0.666105	0.961248	0.0177556	0.0171354	0.0172021	0.295143
FAAH	1.24732	1.03923	1.49707	0.0195426	0.0171467	0.0176364	0.457842
CLEC4C	0.482375	0.266207	0.874077	0.010255	0.0171517	0.0162295	0.60787
LOC649970	1.12414	1.02041	1.23841	0.0168811	0.0171548	0.0178316	0.218
IGFBP3	1.33579	1.05262	1.69515	0.016589	0.0172218	0.0172276	0.642529
MALT1	0.601293	0.395163	0.914948	0.0280071	0.0172262	0.01755	0.519785
FAM14A	0.799253	0.664665	0.961093	0.0239592	0.017244	0.0172294	0.296428
DOK2	0.67432	0.487881	0.932006	0.0150992	0.0172687	0.0170136	0.444125
USP4	0.513148	0.295968	0.889693	0.0171844	0.0172821	0.0174905	0.593725
IRAK2	0.799404	0.665763	0.95987	0.0223441	0.017353	0.0164496	0.294107
RNASE1	0.799108	0.663946	0.961786	0.0181248	0.0173684	0.0176874	0.29784
DYNC1I1	1.28562	1.04406	1.58307	0.022205	0.0174075	0.0179798	0.539008
MPP2	1.34919	1.05155	1.73108	0.0338539	0.0174518	0.0185121	0.679529
KIF2C	1.23785	1.03813	1.47599	0.0158737	0.0174549	0.0174613	0.437856
XAGE5	0.412439	0.198576	0.856628	0.0162469	0.0174707	0.0175522	0.658052
LOC441773	0.665894	0.47567	0.932192	0.0117558	0.0174742	0.0178336	0.456523
LOC646990	0.680567	0.49552	0.934717	0.01965	0.017521	0.0174559	0.439197
SERPINB9	0.506259	0.28862	0.888012	0.0180928	0.017534	0.0175861	0.599391
LOC646445	0.369312	0.162488	0.839393	0.0174476	0.017535	0.0174115	0.676906
LAMP3	0.832646	0.715507	0.968962	0.0213426	0.0175362	0.0179062	0.253455
WARS	0.776043	0.630057	0.955854	0.0176772	0.0175518	0.0170977	0.325797
KIAA0746	0.715483	0.542044	0.944417	0.0225931	0.0176066	0.0180929	0.402373
KIAA0514	0.771516	0.622044	0.956905	0.0186791	0.0177434	0.018231	0.334861
HCG27	0.68313	0.498118	0.93686	0.0169262	0.0177488	0.0180454	0.438743
FLJ36748	0.75781	0.602184	0.953656	0.0196665	0.0177568	0.0180512	0.351472
MMACHC	1.39626	1.05856	1.84169	0.0124111	0.0177696	0.0181392	0.783137
CACNA1B	0.690778	0.508777	0.937886	0.0246917	0.0177896	0.0177421	0.42911
ZNF533	0.859262	0.757579	0.974594	0.0197013	0.0177945	0.0182529	0.217014
AKAP2	0.507047	0.288922	0.889848	0.0153706	0.0178169	0.0179502	0.600926
MAL	0.789553	0.649425	0.959918	0.0166527	0.0178179	0.0177725	0.310494
LOC653626	1.33197	1.05016	1.68942	0.0159758	0.0178275	0.0181046	0.639257
MMP25	0.546256	0.331907	0.899034	0.0186857	0.0178397	0.0173757	0.567127
ABCA2	0.524462	0.307846	0.893501	0.0153132	0.0179057	0.0175858	0.585655
LOC652871	0.509279	0.291158	0.890805	0.0142672	0.017914	0.018016	0.599647
CBLN3	0.771173	0.621843	0.956362	0.0210538	0.0179348	0.0179675	0.334519
C21orf125	1.34719	1.04946	1.7294	0.0344361	0.0179546	0.0193464	0.679947
CAMK1G	0.850326	0.743335	0.972717	0.0180091	0.0179983	0.0181203	0.229382
RGS10	0.70309	0.524298	0.942853	0.017765	0.0180521	0.0186215	0.418555
SMAD7	0.688997	0.505793	0.938558	0.0168725	0.0180677	0.0181752	0.432765
LOC646064	0.627339	0.425885	0.924085	0.0146777	0.0180949	0.0183003	0.4982
CXCL9	0.879555	0.790692	0.978404	0.0201654	0.0181418	0.0181903	0.187713
SLITL2	0.721712	0.550758	0.945729	0.0182738	0.0181474	0.0180532	0.39497
ARG2	1.33889	1.05052	1.70643	0.0226719	0.0181675	0.0183652	0.655913
OSBPL8	0.648997	0.452779	0.930248	0.01968	0.0182101	0.0185933	0.477469
OGDHL	1.23176	1.03491	1.46604	0.024351	0.0182313	0.0189638	0.431129
ANKDD1A	0.72073	0.549124	0.945964	0.0177606	0.0182363	0.0182585	0.39684
LOC144817	0.479917	0.260095	0.885523	0.0183898	0.0182426	0.0188259	0.625428
MORN3	1.36733	1.05425	1.77339	0.0223512	0.0182483	0.0183656	0.71914
LOC643785	0.429016	0.212527	0.866029	0.0190331	0.0183654	0.0182105	0.653502
ZDHHC14	0.721995	0.550866	0.946287	0.0164636	0.0183813	0.0182769	0.39542
MAML3	0.499595	0.28125	0.88745	0.0163062	0.0183885	0.0179193	0.6062
L3MBTL2	0.382816	0.171587	0.854075	0.0202229	0.018417	0.0190157	0.682488
GOLGA2LY1	0.498392	0.280828	0.884507	0.0140088	0.0184566	0.0173467	0.603679
GZMH	0.809122	0.678278	0.965206	0.0183411	0.018458	0.0185993	0.286927
SUHW2	1.42267	1.05982	1.90974	0.0219055	0.0184645	0.0189399	0.849917
CSF2	0.777639	0.630344	0.959352	0.0130154	0.0184654	0.0189117	0.329009
C20orf172	1.40819	1.06603	1.86018	0.0149951	0.0184667	0.015946	0.794156
ZC3H12B	0.632016	0.432296	0.924005	0.0156811	0.0184673	0.0178923	0.491709
SPOP	0.410677	0.197455	0.854146	0.0180603	0.0184688	0.0172227	0.65669
SULT1C1	0.819791	0.694348	0.967897	0.0134237	0.0184828	0.0190248	0.273549
FCN2	0.395421	0.182464	0.856926	0.0188383	0.0184859	0.0187102	0.674463
LOC643865	1.34916	1.05134	1.73135	0.0309129	0.0185015	0.0186029	0.680005
CEL	1.1528	1.02321	1.2988	0.0258537	0.0185051	0.0194337	0.275585
DNASE2B	0.577418	0.364535	0.914622	0.0103303	0.0185961	0.0192703	0.550088
ST3GAL2	0.67143	0.481667	0.935953	0.019716	0.0186039	0.0187466	0.454286
MYO1B	0.772506	0.623564	0.957024	0.0247919	0.018607	0.0181802	0.333459
NISCH	0.65338	0.457958	0.932195	0.0178263	0.0186382	0.0189152	0.474237
NT5C3	1.43945	1.06272	1.94973	0.0240779	0.0186482	0.0186267	0.887007
PPP1R15A	0.728698	0.559498	0.949066	0.0190389	0.0186632	0.0188872	0.389569
ATP6V1B2	0.643849	0.446946	0.927499	0.0203827	0.018664	0.0180747	0.480553
RPIP8	1.25976	1.03755	1.52955	0.0349374	0.0186768	0.0196871	0.492004
SLC4A7	0.6947	0.512636	0.941425	0.0279317	0.0187525	0.0188122	0.428789
LRRC51	1.32425	1.04729	1.67445	0.018634	0.0187836	0.0189801	0.627157
DHCR7	1.4589	1.06493	1.99862	0.0158039	0.0188075	0.0186881	0.933685
C14orf140	1.35963	1.05126	1.75846	0.0195522	0.0188272	0.0192395	0.707205
ACP5	0.844236	0.733038	0.972301	0.0196508	0.018841	0.0187847	0.239263
BARD1	1.39415	1.05541	1.84162	0.0216071	0.0188446	0.0192997	0.78621
FLJ22662	0.81647	0.689809	0.966389	0.0274518	0.0188526	0.0184005	0.276581
NR5A1	0.49904	0.278952	0.892776	0.0181616	0.0188863	0.0191729	0.613824
PDLIM1	0.631192	0.429292	0.928047	0.0203293	0.0188908	0.0193022	0.498755
CD81	0.557052	0.341558	0.908505	0.0239958	0.0188999	0.0190551	0.566947
INSRR	0.53334	0.314586	0.904211	0.0210878	0.0189214	0.0196057	0.589625
CDH6	0.571281	0.358043	0.911516	0.0175193	0.0189389	0.0188441	0.553473
LOC653603	1.34848	1.04962	1.73244	0.0189892	0.018944	0.0193475	0.682823
VHL	0.646934	0.45164	0.926676	0.0217278	0.0189628	0.0175348	0.475036
LOC646858	0.564352	0.349626	0.910954	0.0179809	0.0189892	0.0191949	0.561328
PTHR2	1.25251	1.03645	1.51361	0.0266475	0.0190237	0.0197762	0.477156
LEPROT	0.488427	0.268274	0.889243	0.0177714	0.0190651	0.0190814	0.620969
C6orf203	1.47386	1.06612	2.03754	0.0225701	0.0190997	0.0189028	0.971418
LOC649035	0.467173	0.248187	0.879382	0.0187254	0.019133	0.0183611	0.631195
LOC648349	0.563532	0.348038	0.91245	0.0199594	0.0191424	0.0196693	0.564412
IFI16	0.757675	0.600518	0.955959	0.0209609	0.0191849	0.0192985	0.355441
FLJ11151	0.603793	0.395075	0.922777	0.0166856	0.0191932	0.0197361	0.527703
TMEM97	1.27395	1.03943	1.56137	0.0213805	0.0192032	0.0196728	0.521944
LOC91461	0.779556	0.63399	0.958544	0.0167614	0.0192107	0.0182035	0.324554
FLJ40629	1.24518	1.03639	1.49603	0.0174452	0.0192114	0.019195	0.459632
ADORA2A	0.690171	0.505648	0.942031	0.0159515	0.0192132	0.0194813	0.436383
DKFZp761P0423	0.779609	0.633128	0.95998	0.0280195	0.0192554	0.0190475	0.326852
CDT1	1.24957	1.0367	1.50616	0.0174801	0.0192574	0.0193787	0.469467
C3orf26	1.39742	1.05705	1.84739	0.0185183	0.0192796	0.0187961	0.790336
RAB4B	0.600325	0.392232	0.918819	0.0169667	0.0192973	0.018781	0.526587
LAIR2	0.850606	0.741788	0.975387	0.0119061	0.0193077	0.0205153	0.233599
EDAR	1.25466	1.03611	1.51931	0.0292829	0.019312	0.0201657	0.483195
DMBX1	1.37254	1.05386	1.78758	0.0268087	0.0193306	0.0188179	0.733724
LOC150223	1.44438	1.06081	1.96666	0.0202695	0.019334	0.0195542	0.905857
FLJ33641	0.738117	0.57206	0.952376	0.0189988	0.0193453	0.0195319	0.380316
WWC2	0.641667	0.441648	0.932273	0.0194893	0.0193601	0.0199165	0.490625
SLC36A1	0.766852	0.613754	0.958141	0.0214891	0.0193738	0.019476	0.344387
MGC17330	0.796007	0.657817	0.963228	0.0317515	0.0194306	0.0190242	0.305411
LOC648277	0.570274	0.355604	0.914535	0.0199428	0.0194345	0.0197688	0.558931
KIAA1912	0.790859	0.648932	0.963826	0.0186976	0.019448	0.0200687	0.314894
SUSD3	0.796197	0.657287	0.964465	0.0222904	0.019471	0.0198147	0.307178
CAPN3	0.644995	0.445852	0.933088	0.0156715	0.0194732	0.0199352	0.487236
IDS	0.598274	0.387826	0.922919	0.0189198	0.0195578	0.0201985	0.535092
RPP40	1.38287	1.05237	1.81718	0.021204	0.0195585	0.0200049	0.764812
LOC387873	0.45895	0.238849	0.881874	0.0181145	0.0195793	0.0194285	0.643025
ACOT6	0.39886	0.18418	0.863768	0.0156601	0.0195813	0.0197301	0.679588
CD24	1.25003	1.0359	1.50843	0.0202806	0.0195883	0.0199196	0.472529
LOC391276	0.426483	0.208061	0.874203	0.022092	0.0196142	0.0199603	0.666142
LOC388955	0.421079	0.203067	0.87315	0.0182657	0.0196341	0.0200976	0.670083
SGOL1	1.36628	1.04988	1.77802	0.0204514	0.0196543	0.0202232	0.728137
ANXA11	0.674496	0.484631	0.938745	0.0163212	0.0197185	0.0195573	0.454114
SOX7	0.769708	0.617529	0.959389	0.0187824	0.0197674	0.0198675	0.34186
NALP9	0.545851	0.327362	0.910165	0.0191357	0.0197803	0.0202975	0.582804
LOC644634	0.604827	0.396161	0.923402	0.0168147	0.01981	0.0198536	0.527241
TNNC2	0.890797	0.807508	0.982676	0.0154473	0.0198188	0.0209496	0.175168
TIFA	1.42828	1.05731	1.9294	0.0198901	0.0198258	0.020171	0.872091
ARHGAP1	0.550005	0.332021	0.911104	0.0222574	0.0198694	0.0202609	0.579083
RN7SL1	0.438165	0.218378	0.879159	0.0232284	0.0198727	0.0202088	0.660781
MAP2K3	0.221707	0.0625839	0.78541	0.0172783	0.0198766	0.0195821	0.722826
GTSCR1	0.559327	0.342684	0.912929	0.0155684	0.0198832	0.0201041	0.570245
LOC652287	0.517028	0.296166	0.902595	0.0186621	0.0198867	0.0203162	0.60643
GMPPB	0.539945	0.320743	0.908954	0.0213693	0.0199199	0.0203842	0.588211
RAB30	0.739931	0.574126	0.95362	0.0189457	0.0199212	0.0199739	0.379494
RPRC1	0.564386	0.348547	0.913883	0.0233083	0.0199265	0.0200093	0.565336
CCBP2	0.837872	0.72138	0.973176	0.0166009	0.0199388	0.0205607	0.251796
EOMES	0.813383	0.683268	0.968276	0.0195873	0.0199491	0.0202091	0.285008
PTPN20A	1.31205	1.04281	1.65079	0.0235055	0.0199584	0.0204641	0.607981
TNFRSF25	0.662862	0.468556	0.937746	0.0177432	0.019978	0.0201732	0.46919
SPOCK	1.19643	1.02796	1.3925	0.0189002	0.0199825	0.0205536	0.364544
MVD	1.38421	1.05374	1.81834	0.0192471	0.0200117	0.0194891	0.764598
RALGDS	0.49258	0.271335	0.894228	0.0160482	0.0200136	0.0199431	0.622893
LAYN	0.769137	0.616996	0.958793	0.0227763	0.0200139	0.0195875	0.341797
UNQ5810	0.433867	0.214321	0.87831	0.020447	0.020036	0.0203105	0.663989
LOC644556	0.495987	0.27461	0.895828	0.0175017	0.0200676	0.0200899	0.621217
EDN1	0.81294	0.68217	0.968779	0.020796	0.0200757	0.0206437	0.286609
ULBP1	1.36129	1.04833	1.76768	0.0233174	0.0200911	0.0206655	0.719356
C12orf53	0.516997	0.295781	0.903659	0.0184301	0.0200936	0.0205843	0.607878
SRPX	0.855348	0.749228	0.9765	0.0248807	0.0201236	0.0207873	0.227272
PLEKHA2	0.42897	0.209642	0.877761	0.0190752	0.0201336	0.0205106	0.668119
[truncated: 925 more rows]
